# Supplementary material for: ONCOPLEX: an oncology-inspired hypergraph model integrating diverse biological knowledge for cancer driver gene prediction
Source: Sci Rep. 2026 Jan 13;16:5164. doi: 10.1038/s41598-026-36127-8 (PMC12881423; doi:10.1038/s41598-026-36127-8)
Supplement: Supplementary file 2 — Supplementary Information 2. [file 41598_2026_36127_MOESM2_ESM.xlsx]

## Sheet: S1
Table S1: Comparison of the performance of ONCOPLEX and the baseline methods in the prediction task of the pan-cancer driver gene. The mean ± standard deviation of the AUPRC, AUROC and F1-score is reported for each method in the evaluation runs.
	EMOGI	MTGCN	HGCN	DISHyper	ONCOPLEX
AUPRC	0.830 ± 0.020	0.847 ± 0.021	0.839 ± 0.033	0.876 ± 0.005	0.925 ± 0.014
AUROC	0.866 ± 0.015	0.881 ± 0.018	0.853 ± 0.027	0.929 ± 0.006	0.934 ± 0.014
F1	0.726 ± 0.024	0.756 ± 0.018	0.736 ± 0.027	0.717 ± 0.025	0.838 ± 0.013

## Sheet: S2
Table S2: Comparison of the performance of ONCOPLEX and the baseline methods in 11 types of individual cancers. The mean ± standard deviation of the AUPRC, AUROC and F1-score are reported for each method and cancer type.
Cancer Type	EMOGI	MTGCN	HGCN	DisHyper	OncoPlex	EMOGI	MTGCN	HGCN	DisHyper	OncoPlex	EMOGI	MTGCN	HGCN	DisHyper	OncoPlex
BRCA	0.450 ± 0.103	0.649 ± 0.158	0.434 ± 0.171	0.719 ± 0.133	0.920 ± 0.074	0.920 ± 0.074	0.926 ± 0.037	0.931 ± 0.071	0.968 ± 0.016	0.989 ± 0.011	0.198 ± 0.041	0.268 ± 0.063	0.380 ± 0.064	0.326 ± 0.102	0.731 ± 0.107
BLCA	0.414 ± 0.094	0.733 ± 0.095	0.354 ± 0.136	0.666 ± 0.133	0.889 ± 0.056	0.889 ± 0.056	0.943 ± 0.023	0.979 ± 0.009	0.930 ± 0.027	0.983 ± 0.023	0.181 ± 0.028	0.292 ± 0.038	0.297 ± 0.087	0.241 ± 0.108	0.702 ± 0.096
LUAD	0.293 ± 0.107	0.639 ± 0.227	0.323 ± 0.102	0.686 ± 0.116	0.905 ± 0.063	0.905 ± 0.063	0.925 ± 0.043	0.934 ± 0.062	0.918 ± 0.063	0.991 ± 0.010	0.125 ± 0.045	0.317 ± 0.106	0.320 ± 0.100	0.234 ± 0.058	0.787 ± 0.113
STAD	0.354 ± 0.138	0.645 ± 0.204	0.376 ± 0.145	0.705 ± 0.149	0.895 ± 0.089	0.895 ± 0.089	0.951 ± 0.019	0.966 ± 0.019	0.944 ± 0.053	0.985 ± 0.024	0.192 ± 0.040	0.303 ± 0.032	0.295 ± 0.078	0.259 ± 0.068	0.806 ± 0.106
THCA	0.138 ± 0.042	0.321 ± 0.125	0.222 ± 0.136	0.459 ± 0.204	0.610 ± 0.134	0.610 ± 0.134	0.892 ± 0.025	0.914 ± 0.044	0.869 ± 0.117	0.911 ± 0.038	0.111 ± 0.026	0.170 ± 0.050	0.262 ± 0.092	0.208 ± 0.088	0.438 ± 0.169
LUSC	0.205 ± 0.074	0.512 ± 0.113	0.210 ± 0.246	0.667 ± 0.239	0.942 ± 0.085	0.942 ± 0.085	0.905 ± 0.045	0.967 ± 0.019	0.911 ± 0.089	0.997 ± 0.005	0.136 ± 0.031	0.205 ± 0.038	0.295 ± 0.086	0.169 ± 0.104	0.868 ± 0.190
LIHC	0.410 ± 0.145	0.606 ± 0.059	0.400 ± 0.170	0.787 ± 0.117	0.878 ± 0.041	0.878 ± 0.041	0.920 ± 0.041	0.946 ± 0.041	0.989 ± 0.006	0.988 ± 0.022	0.160 ± 0.030	0.288 ± 0.048	0.420 ± 0.061	0.308 ± 0.049	0.720 ± 0.074
HNSC	0.371 ± 0.095	0.725 ± 0.088	0.256 ± 0.180	0.655 ± 0.191	0.919 ± 0.138	0.919 ± 0.138	0.913 ± 0.014	0.957 ± 0.036	0.913 ± 0.043	0.985 ± 0.030	0.159 ± 0.023	0.320 ± 0.071	0.351 ± 0.086	0.194 ± 0.129	0.850 ± 0.118
CESC	0.336 ± 0.139	0.688 ± 0.126	0.340 ± 0.271	0.710 ± 0.228	0.921 ± 0.115	0.921 ± 0.115	0.942 ± 0.038	0.952 ± 0.033	0.938 ± 0.082	0.989 ± 0.023	0.152 ± 0.013	0.373 ± 0.063	0.290 ± 0.099	0.223 ± 0.110	0.745 ± 0.121
PRAD	0.334 ± 0.172	0.564 ± 0.092	0.246 ± 0.153	0.523 ± 0.178	0.648 ± 0.154	0.648 ± 0.154	0.887 ± 0.070	0.900 ± 0.045	0.869 ± 0.072	0.947 ± 0.056	0.122 ± 0.039	0.259 ± 0.051	0.352 ± 0.128	0.205 ± 0.118	0.500 ± 0.058
ESCA	0.136 ± 0.093	0.404 ± 0.246	0.058 ± 0.037	0.685 ± 0.235	0.835 ± 0.128	0.835 ± 0.128	0.833 ± 0.185	0.945 ± 0.047	0.984 ± 0.020	0.983 ± 0.019	0.096 ± 0.058	0.254 ± 0.126	0.252 ± 0.111	0.105 ± 0.106	0.778 ± 0.107
	AUPRC					AUROC					F1 score

## Sheet: S3
Table S3: Results of the numerical ranking of pan-cancer. The Hits value represents the average hits over five times for each method.
	EMOGI		MTGCN		HGCN		DisHyper		OncoPlex
K	P@K	Hits@k	P@K	Hits@k	P@K	Hits@k	P@K	Hits@k	P@K	Hits@k
1	0.4	0.4	0.2	0.2	0.2	0.2	1	1	1	1
2	0.5	1	0.4	0.8	0.6	1.2	1	2	1	2
3	0.466667	1.4	0.466667	1.4	0.533333	1.6	1	3	1	3
4	0.4	1.6	0.45	1.8	0.55	2.2	0.95	3.8	1	4
5	0.32	1.6	0.48	2.4	0.52	2.6	0.88	4.4	1	5
6	0.3	1.8	0.4	2.4	0.533333	3.2	0.833333	5	0.966667	5.8
7	0.314286	2.2	0.342857	2.4	0.514286	3.6	0.742857	5.2	0.971429	6.8
8	0.325	2.6	0.35	2.8	0.5	4	0.675	5.4	0.975	7.8
9	0.333333	3	0.311111	2.8	0.511111	4.6	0.622222	5.6	0.955556	8.6
10	0.34	3.4	0.3	3	0.48	4.8	0.62	6.2	0.96	9.6
11	0.345455	3.8	0.309091	3.4	0.490909	5.4	0.6	6.6	0.945455	10.4
12	0.333333	4	0.3	3.6	0.483333	5.8	0.6	7.2	0.95	11.4
13	0.323077	4.2	0.276923	3.6	0.446154	5.8	0.553846	7.2	0.953846	12.4
14	0.314286	4.4	0.285714	4	0.428571	6	0.542857	7.6	0.942857	13.2
15	0.306667	4.6	0.266667	4	0.453333	6.8	0.52	7.8	0.946667	14.2
16	0.2875	4.6	0.275	4.4	0.4375	7	0.5125	8.2	0.9375	15
17	0.270588	4.6	0.258824	4.4	0.447059	7.6	0.529412	9	0.917647	15.6
18	0.266667	4.8	0.266667	4.8	0.455556	8.2	0.544444	9.8	0.922222	16.6
19	0.252632	4.8	0.273684	5.2	0.452632	8.6	0.536842	10.2	0.915789	17.4
20	0.25	5	0.27	5.4	0.45	9	0.51	10.2	0.88	17.6
21	0.257143	5.4	0.266667	5.6	0.457143	9.6	0.504762	10.6	0.885714	18.6
22	0.254545	5.6	0.263636	5.8	0.481818	10.6	0.490909	10.8	0.881818	19.4
23	0.252174	5.8	0.26087	6	0.478261	11	0.469565	10.8	0.878261	20.2
24	0.25	6	0.25	6	0.458333	11	0.458333	11	0.866667	20.8
25	0.24	6	0.24	6	0.456	11.4	0.44	11	0.848	21.2
26	0.230769	6	0.246154	6.4	0.461538	12	0.423077	11	0.823077	21.4
27	0.222222	6	0.244444	6.6	0.451852	12.2	0.407407	11	0.822222	22.2
28	0.214286	6	0.242857	6.8	0.45	12.6	0.4	11.2	0.807143	22.6
29	0.213793	6.2	0.241379	7	0.448276	13	0.4	11.6	0.786207	22.8
30	0.213333	6.4	0.24	7.2	0.433333	13	0.393333	11.8	0.786667	23.6
31	0.212903	6.6	0.232258	7.2	0.43871	13.6	0.387097	12	0.774194	24
32	0.2125	6.8	0.23125	7.4	0.425	13.6	0.3875	12.4	0.76875	24.6
33	0.212121	7	0.224242	7.4	0.412121	13.6	0.393939	13	0.769697	25.4
34	0.211765	7.2	0.217647	7.4	0.405882	13.8	0.394118	13.4	0.758824	25.8
35	0.211429	7.4	0.211429	7.4	0.394286	13.8	0.388571	13.6	0.737143	25.8
36	0.205556	7.4	0.205556	7.4	0.383333	13.8	0.377778	13.6	0.727778	26.2
37	0.205405	7.6	0.2	7.4	0.372973	13.8	0.372973	13.8	0.718919	26.6
38	0.205263	7.8	0.2	7.6	0.363158	13.8	0.373684	14.2	0.715789	27.2
39	0.2	7.8	0.2	7.8	0.374359	14.6	0.364103	14.2	0.712821	27.8
40	0.195	7.8	0.205	8.2	0.37	14.8	0.355	14.2	0.71	28.4
41	0.190244	7.8	0.204878	8.4	0.37561	15.4	0.346341	14.2	0.707317	29
42	0.190476	8	0.204762	8.6	0.37619	15.8	0.342857	14.4	0.695238	29.2
43	0.190698	8.2	0.2	8.6	0.372093	16	0.334884	14.4	0.683721	29.4
44	0.186364	8.2	0.195455	8.6	0.363636	16	0.327273	14.4	0.672727	29.6
45	0.182222	8.2	0.191111	8.6	0.368889	16.6	0.32	14.4	0.666667	30
46	0.182609	8.4	0.186957	8.6	0.365217	16.8	0.313043	14.4	0.665217	30.6
47	0.182979	8.6	0.187234	8.8	0.361702	17	0.314894	14.8	0.668085	31.4
48	0.183333	8.8	0.183333	8.8	0.3625	17.4	0.3125	15	0.658333	31.6
49	0.183673	9	0.183673	9	0.359184	17.6	0.310204	15.2	0.64898	31.8
50	0.18	9	0.18	9	0.352	17.6	0.304	15.2	0.644	32.2

## Sheet: S4
Table S4: Results of pan-cancer ablation showing the impact of different configurations of node features on model performance. Values are reported as mean ± standard deviation in cross-validation folds for AUPRC, AUROC, and F1-score.
Metric	Incidence-based features	Core omics features	Topology + Comprehensive features
AUPRC	0.77 ± 0.038	0.86 ± 0.031	0.925 ± 0.041
AUROC	0.81 ± 0.027	0.89 ± 0.023	0.934 ± 0.014
F1	0.68 ± 0.019	0.79 ± 0.023	0.838 ± 0.013

## Sheet: S5
Table S5: AUPRC specific to the cancer-type in different configurations of features.
Cancer type	Incidence-based Features	Core Omics Features	Comprehensive Features
BRCA	0.563	0.81	0.92
BLCA	0.471	0.939	0.889
LUAD	0.43	0.809	0.905
STAD	0.504	0.84	0.895
THCA	0.238	0.425	0.61
LUSC	0.42	0.915	0.942
LIHC	0.465	0.859	0.878
HNSC	0.266	0.787	0.919
CESC	0.383	0.93	0.921
PRAD	0.266	0.635	0.648
ESCA	0.456	0.743	0.835

## Sheet: S6
Table S6: Complete list of 30 newly predicted candidate genes for each cancer type. Genes are classified as common drivers or novel candidates not previously reported as cancer driver genes, and supporting evidence from established cancer-related databases is provided where available.
BRCA			BLCA			LUAD			STAD			THCA			LUSC			LIHC			HNSC			CESC			PRAD			ESCA
Gene	Known driver?	Database Support	Gene	Known driver?	Database Support	Gene	Known driver?	Database Support	Gene	Known driver?	Database Support	Gene	Known driver?	Database Support	Gene	Known driver?	Database Support	Gene	Known driver?	Database Support	Gene	Known driver?	Database Support	Gene	Known driver?	Database Support	Gene	Known driver?	Database Support	Gene	Known driver?	Database Support
GRB2	No	CancerMine	PIK3R1	Yes	Ongene, CancerMine, OncoKB	PIK3R1	Yes	Ongene, CancerMine, OncoKB	AKT1	Yes	Ongene, CancerMine, OncoKB	NPM1	Yes	Ongene, CancerMine, OncoKB	AKT1	Yes	Ongene, CancerMine, OncoKB	AKT1	Yes	Ongene, CancerMine, OncoKB	KRAS	Yes	Ongene, CancerMine, OncoKB	PIK3R1	Yes	Ongene, CancerMine, OncoKB	MAPK1	Yes	CancerMine, OncoKB	PIK3R1	Yes	Ongene, CancerMine, OncoKB
NRAS	Yes	Ongene, CancerMine, OncoKB	AKT1	Yes	Ongene, CancerMine, OncoKB	HRAS	Yes	Ongene, CancerMine, OncoKB	NRAS	Yes	Ongene, CancerMine, OncoKB	MAPK1	Yes	CancerMine, OncoKB	MAPK1	Yes	CancerMine, OncoKB	SMAD4	Yes	CancerMine, OncoKB	MAPK3	No	CancerMine	MAPK3	No	CancerMine	MAP2K1	Yes	CancerMine, OncoKB	AKT1	Yes	Ongene, CancerMine, OncoKB
SHC1	No	CancerMine	EGFR	Yes	Ongene, CancerMine, OncoKB	SOS1	No	CancerMine	HRAS	Yes	Ongene, CancerMine, OncoKB	PIK3R1	Yes	Ongene, CancerMine, OncoKB	SOS1	No	CancerMine	MAPK1	Yes	CancerMine, OncoKB	AKT1	Yes	Ongene, CancerMine, OncoKB	CREBBP	Yes	CancerMine, OncoKB	MAPK3	No	CancerMine	CDKN1A	Yes	Ongene, CancerMine, OncoKB
SOS1	No	CancerMine	MAPK1	Yes	CancerMine, OncoKB	MAPK1	Yes	CancerMine, OncoKB	EGFR	Yes	Ongene, CancerMine, OncoKB	PIK3CA	Yes	Ongene, CancerMine, OncoKB	CDKN1A	Yes	Ongene, CancerMine, OncoKB	HRAS	Yes	Ongene, CancerMine, OncoKB	NRAS	Yes	Ongene, CancerMine, OncoKB	HRAS	Yes	Ongene, CancerMine, OncoKB	SOS1	No	CancerMine	MYC	Yes	Ongene, CancerMine, OncoKB
MAPK1	Yes	CancerMine, OncoKB	JUN	Yes	Ongene, CancerMine, OncoKB	AKT1	Yes	Ongene, CancerMine, OncoKB	SOS1	No	CancerMine	MAP2K1	Yes	CancerMine, OncoKB	MAP2K1	Yes	CancerMine, OncoKB	PIK3R1	Yes	Ongene, CancerMine, OncoKB	SOS1	No	CancerMine	RAF1	Yes	Ongene, CancerMine, OncoKB	MAP2K2	Yes	OncoKB	PIK3CD	No	CancerMine
MAPK3	No	CancerMine	PIK3R2	No	CancerMine, OncoKB	RAF1	Yes	Ongene, CancerMine, OncoKB	MYC	Yes	Ongene, CancerMine, OncoKB	RAF1	Yes	Ongene, CancerMine, OncoKB	RAF1	Yes	Ongene, CancerMine, OncoKB	SMAD3	Yes	CancerMine, OncoKB	BRAF	Yes	Ongene, CancerMine, OncoKB	MAP2K1	Yes	CancerMine, OncoKB	AKT2	Yes	Ongene, CancerMine, OncoKB	EGFR	Yes	Ongene, CancerMine, OncoKB
PIK3CB	Yes	CancerMine, OncoKB	MYC	Yes	Ongene, CancerMine, OncoKB	PIK3CB	Yes	CancerMine, OncoKB	AXIN1	Yes	CancerMine, OncoKB	CLTC	Yes	CancerMine	CCND1	Yes	Ongene, CancerMine, OncoKB	GSK3B	No	CancerMine, OncoKB	EGFR	Yes	Ongene, CancerMine, OncoKB	MAPK8	Yes	CancerMine	NRAS	Yes	Ongene, CancerMine, OncoKB	PIK3CB	Yes	CancerMine, OncoKB
PIK3R2	No	CancerMine, OncoKB	CDKN1B	Yes	Ongene, CancerMine, OncoKB	MAPK3	No	CancerMine	SRC	Yes	Ongene, CancerMine, OncoKB	JAK2	Yes	Ongene, CancerMine, OncoKB	MDM2	Yes	Ongene, CancerMine, OncoKB	CREBBP	Yes	CancerMine, OncoKB	MAP2K1	Yes	CancerMine, OncoKB	SOS1	No	CancerMine	AKT3	Yes	CancerMine, OncoKB	NRAS	Yes	Ongene, CancerMine, OncoKB
SRC	Yes	Ongene, CancerMine, OncoKB	GSK3B	No	CancerMine, OncoKB	AKT3	Yes	CancerMine, OncoKB	PIK3CB	Yes	CancerMine, OncoKB	SOS1	No	CancerMine	STAT3	Yes	Ongene, CancerMine, OncoKB	MYC	Yes	Ongene, CancerMine, OncoKB	SHC1	No	CancerMine	NRAS	Yes	Ongene, CancerMine, OncoKB	MTOR	Yes	Ongene, CancerMine, OncoKB	AKT3	Yes	CancerMine, OncoKB
MAP2K1	Yes	CancerMine, OncoKB	SOS1	No	CancerMine	GRB2	No	CancerMine	TCF7L2	Yes	CancerMine, OncoKB	BIRC6	No	CancerMine	MYC	Yes	Ongene, CancerMine, OncoKB	PRKACB	No	CancerMine	RAF1	Yes	Ongene, CancerMine, OncoKB	SMAD3	Yes	CancerMine, OncoKB	GRB2	No	CancerMine	HRAS	Yes	Ongene, CancerMine, OncoKB
JUN	Yes	Ongene, CancerMine, OncoKB	APC	Yes	CancerMine, OncoKB	CREBBP	Yes	CancerMine, OncoKB	MAPK1	Yes	CancerMine, OncoKB	ARAF	No	Ongene, CancerMine, OncoKB	MAPK3	No	CancerMine	EGFR	Yes	Ongene, CancerMine, OncoKB	JAK2	Yes	Ongene, CancerMine, OncoKB	PIK3CB	Yes	CancerMine, OncoKB	PIK3CD	No	CancerMine	MTOR	Yes	Ongene, CancerMine, OncoKB
RAF1	Yes	Ongene, CancerMine, OncoKB	MAPK3	No	CancerMine	CCND1	Yes	Ongene, CancerMine, OncoKB	LEF1	Yes	Ongene, CancerMine	MAP2K2	Yes	OncoKB	AKT3	Yes	CancerMine, OncoKB	CCND1	Yes	Ongene, CancerMine, OncoKB	SRC	Yes	Ongene, CancerMine, OncoKB	MYC	Yes	Ongene, CancerMine, OncoKB	SRC	Yes	Ongene, CancerMine, OncoKB	CDKN1B	Yes	Ongene, CancerMine, OncoKB
MAPK8	Yes	CancerMine	PIK3R3	No	CancerMine	PIK3CD	No	CancerMine	SMAD3	Yes	CancerMine, OncoKB	SRC	Yes	Ongene, CancerMine, OncoKB	CDKN1B	Yes	Ongene, CancerMine, OncoKB	CDKN1B	Yes	Ongene, CancerMine, OncoKB	PIK3R2	No	CancerMine, OncoKB	PIK3CD	No	CancerMine	SHC1	No	CancerMine	CCND1	Yes	Ongene, CancerMine, OncoKB
PLCG1	Yes	CancerMine	SMAD4	Yes	CancerMine, OncoKB	MTOR	Yes	Ongene, CancerMine, OncoKB	RAC1	Yes	Ongene, CancerMine, OncoKB	PTEN	Yes	CancerMine, OncoKB	GSK3B	No	CancerMine, OncoKB	SOS1	No	CancerMine	PIK3CB	Yes	CancerMine, OncoKB	EGFR	Yes	Ongene, CancerMine, OncoKB	EGFR	Yes	Ongene, CancerMine, OncoKB	PIK3R3	No	CancerMine
PIK3CG	No	CancerMine, OncoKB	SRC	Yes	Ongene, CancerMine, OncoKB	PTPN11	Yes	Ongene, CancerMine, OncoKB	PLCG1	Yes	CancerMine	PIK3CB	Yes	CancerMine, OncoKB	PTPN11	Yes	Ongene, CancerMine, OncoKB	GADD45A	No	CancerMine	PIK3CD	No	CancerMine	NFKB1	No	CancerMine	ARAF	No	Ongene, CancerMine, OncoKB	SETD2	Yes	CancerMine, OncoKB
PTPN11	Yes	Ongene, CancerMine, OncoKB	SHC1	No	CancerMine	SRC	Yes	Ongene, CancerMine, OncoKB	CCND1	Yes	Ongene, CancerMine, OncoKB	EIF2AK3	No	CancerMine	MAPK8	Yes	CancerMine	NFKB1	No	CancerMine	JUN	Yes	Ongene, CancerMine, OncoKB	GRB2	No	CancerMine	PIK3R2	No	CancerMine, OncoKB	SMARCB1	Yes	CancerMine, OncoKB
PIK3CD	No	CancerMine	PIK3CD	No	CancerMine	PLCG1	Yes	CancerMine	EP300	Yes	CancerMine, OncoKB	CTNNB1	Yes	Ongene, CancerMine, OncoKB	JUN	Yes	Ongene, CancerMine, OncoKB	E2F1	Yes	Ongene, CancerMine	STAT3	Yes	Ongene, CancerMine, OncoKB	BRAF	Yes	Ongene, CancerMine, OncoKB	JAK2	Yes	Ongene, CancerMine, OncoKB	BRAF	Yes	Ongene, CancerMine, OncoKB
MYC	Yes	Ongene, CancerMine, OncoKB	NFKB1	No	CancerMine	MAP2K2	Yes	OncoKB	RAF1	Yes	Ongene, CancerMine, OncoKB	EGFR	Yes	Ongene, CancerMine, OncoKB	JAK2	Yes	Ongene, CancerMine, OncoKB	BRAF	Yes	Ongene, CancerMine, OncoKB	GRB2	No	CancerMine	AKT3	Yes	CancerMine, OncoKB	PTPN11	Yes	Ongene, CancerMine, OncoKB	LEF1	Yes	Ongene, CancerMine
RAC1	Yes	Ongene, CancerMine, OncoKB	JAK2	Yes	Ongene, CancerMine, OncoKB	STAT3	Yes	Ongene, CancerMine, OncoKB	SHC1	No	CancerMine	EML4	Yes	Ongene, CancerMine	RHOA	Yes	Ongene, CancerMine, OncoKB	MAPK3	No	CancerMine	CTNNB1	Yes	Ongene, CancerMine, OncoKB	PIK3R3	No	CancerMine	PIK3CG	No	CancerMine, OncoKB	PIK3CG	No	CancerMine, OncoKB
STAT3	Yes	Ongene, CancerMine, OncoKB	STAT3	Yes	Ongene, CancerMine, OncoKB	CDKN1A	Yes	Ongene, CancerMine, OncoKB	PTPN11	Yes	Ongene, CancerMine, OncoKB	SOS2	No	CancerMine	PLCG1	Yes	CancerMine	LEF1	Yes	Ongene, CancerMine	PTPN11	Yes	Ongene, CancerMine, OncoKB	PIK3CG	No	CancerMine, OncoKB	RAC1	Yes	Ongene, CancerMine, OncoKB	RAF1	Yes	Ongene, CancerMine, OncoKB
PIK3R3	No	CancerMine	AKT3	Yes	CancerMine, OncoKB	JAK2	Yes	Ongene, CancerMine, OncoKB	MAPK3	No	CancerMine	BCL11A	Yes	Ongene, CancerMine	NFKB1	No	CancerMine	JAK2	Yes	Ongene, CancerMine, OncoKB	MAP3K1	Yes	CancerMine, OncoKB	SMAD2	Yes	CancerMine, OncoKB	JUN	Yes	Ongene, CancerMine, OncoKB	TCF7L2	Yes	CancerMine, OncoKB
NFKB1	No	CancerMine	MAPK8	Yes	CancerMine	PIK3R2	No	CancerMine, OncoKB	PIK3R2	No	CancerMine, OncoKB	EP300	Yes	CancerMine, OncoKB	CTNNB1	Yes	Ongene, CancerMine, OncoKB	MTOR	Yes	Ongene, CancerMine, OncoKB	CDKN1A	Yes	Ongene, CancerMine, OncoKB	CTNNB1	Yes	Ongene, CancerMine, OncoKB	NFKB1	No	CancerMine	GSK3B	No	CancerMine, OncoKB
CTNNB1	Yes	Ongene, CancerMine, OncoKB	UBC	No	CancerMine	SOS2	No	CancerMine	STAT3	Yes	Ongene, CancerMine, OncoKB	NF1	Yes	CancerMine, OncoKB	PIK3CB	Yes	CancerMine, OncoKB	JUN	Yes	Ongene, CancerMine, OncoKB	NFKB1	No	CancerMine	JUN	Yes	Ongene, CancerMine, OncoKB	PLCG1	Yes	CancerMine	SOX9	Yes	CancerMine, OncoKB
RHOA	Yes	Ongene, CancerMine, OncoKB	MAP2K1	Yes	CancerMine, OncoKB	CDH1	Yes	Ongene, CancerMine, OncoKB	MAP2K1	Yes	CancerMine, OncoKB	RHOA	Yes	Ongene, CancerMine, OncoKB	BRAF	Yes	Ongene, CancerMine, OncoKB	MAP2K1	Yes	CancerMine, OncoKB	PIK3R3	No	CancerMine	MTOR	Yes	Ongene, CancerMine, OncoKB	GSK3B	No	CancerMine, OncoKB	JAK2	Yes	Ongene, CancerMine, OncoKB
AKT3	Yes	CancerMine, OncoKB	BCL2	Yes	Ongene, CancerMine, OncoKB	RHOA	Yes	Ongene, CancerMine, OncoKB	CREBBP	Yes	CancerMine, OncoKB	RB1	Yes	CancerMine, OncoKB	E2F1	Yes	Ongene, CancerMine	MDM2	Yes	Ongene, CancerMine, OncoKB	AKT3	Yes	CancerMine, OncoKB	STAT3	Yes	Ongene, CancerMine, OncoKB	MAPK8	Yes	CancerMine	CASP8	Yes	CancerMine, OncoKB
STAT5B	Yes	CancerMine, OncoKB	CCND1	Yes	Ongene, CancerMine, OncoKB	GSK3B	No	CancerMine, OncoKB	CDKN1A	Yes	Ongene, CancerMine, OncoKB	STAT3	Yes	Ongene, CancerMine, OncoKB	MTOR	Yes	Ongene, CancerMine, OncoKB	ADCY8	No	None	FYN	No	Ongene, CancerMine	CDKN1A	Yes	Ongene, CancerMine, OncoKB	MAPK14	No	CancerMine	JUN	Yes	Ongene, CancerMine, OncoKB
STAT5A	No	CancerMine, OncoKB	SMAD3	Yes	CancerMine, OncoKB	CDKN1B	Yes	Ongene, CancerMine, OncoKB	MTOR	Yes	Ongene, CancerMine, OncoKB	AKT3	Yes	CancerMine, OncoKB	FYN	No	Ongene, CancerMine	RAF1	Yes	Ongene, CancerMine, OncoKB	PRKCA	No	Ongene, CancerMine	PRKCA	No	Ongene, CancerMine	STAT3	Yes	Ongene, CancerMine, OncoKB	KMT2A	Yes	Ongene, CancerMine, OncoKB
STAT1	No	CancerMine	AKT2	Yes	Ongene, CancerMine, OncoKB	AKT2	Yes	Ongene, CancerMine, OncoKB	AKT3	Yes	CancerMine, OncoKB	MAPK3	No	CancerMine	SRC	Yes	Ongene, CancerMine, OncoKB	AKT3	Yes	CancerMine, OncoKB	SMAD2	Yes	CancerMine, OncoKB	RAC1	Yes	Ongene, CancerMine, OncoKB	RELA	No	CancerMine	KIT	Yes	Ongene, CancerMine, OncoKB
CBL	Yes	Ongene, CancerMine, OncoKB	BAX	Yes	Ongene, CancerMine	CBL	Yes	Ongene, CancerMine, OncoKB	JAK2	Yes	Ongene, CancerMine, OncoKB	PTPN11	Yes	Ongene, CancerMine, OncoKB	PIK3R2	No	CancerMine, OncoKB	ATM	Yes	CancerMine, OncoKB	FGFR1	Yes	Ongene, CancerMine, OncoKB	TGFBR1	No	CancerMine	RPS6KB1	No	CancerMine	MEN1	Yes	CancerMine, OncoKB
FYN	No	Ongene, CancerMine	RAC1	Yes	Ongene, CancerMine, OncoKB	MAPK8	Yes	CancerMine	GRB2	No	CancerMine	PLCG1	Yes	CancerMine	PRKCA	No	Ongene, CancerMine	PRKCA	No	Ongene, CancerMine	CDKN1B	Yes	Ongene, CancerMine, OncoKB	RHOA	Yes	Ongene, CancerMine, OncoKB	CDC42	No	CancerMine	MAPK3	No	CancerMine

## Sheet: S7
Table S7: New candidate genes identified in the top five ranked cancer types. For cancer types in which no novel genes appear among the top predictions, no entries are reported. The potential biological relevance of these genes was assessed through a comprehensive manual literature review.
Cancer Type	Gene Name	Potential Role in Cancer	Ref
BRCA	GAB1	GAB1 is a key adaptor protein that functions at the intersection of the MAPK and PI3K-AKT signaling pathways, both of which are critical in cancer development and progression. Alterations in GAB1 expression or activity have been shown to modulate these pathways. In particular, studies have identified dysregulation of GAB1 in specific cancer subtypes, such as triple-negative breast cancer (TNBC), …	[1]
BLCA	UBA52	Ubiquitin A-52 Residue Ribosomal Protein Fusion Product 1 encodes a fusion protein involved in ubiquitin signaling and protein homeostasis.	[2], [3]
STAD	NRG3	NRG3 is a member of the neuregulin gene family, which encodes ligands for the ERBB3 and ERBB4 receptors -part of the epidermal growth factor receptor (EGFR) family. Upon binding, NRG3 activates signaling pathways that regulate key cellular processes such as proliferation, migration, differentiation, survival, and apoptosis. It related to autophagy process, which is vital in cancer cell and its us…	[4]
	PRKCG	Protein Kinase C Gamma is widely known to be involved in multiple cellular pathways such as growth, differentiation, and apoptosis. Some studies found that the variants in this genes -both coding and non-coding an affect gene regulation through and epigentics mechanim wich contribute to cancer developement.	[5], [6]
	DVL1	DVL1 gene involved in key cellular pathways, including Wnt signaling (notably in hepatocellular carcinoma) and COP1 E3 ubiquitin ligase autodegradation.	[7]
	GRIN2B	GRIN2B may play a critical role in cancer by promoting intracellular calcium influx, which can suppress cellular senescence and support tumor progression, suggesting its potential as an oncogenic effector in calcium signaling pathways. Additionally, it has been found to be methylated in other cancers, such as head and neck and gastric cancers.	[ 8]
THCA	PPM1B	PPM1B encodes a protein belonging to the PP2C family, which is known to negatively regulate cellular stress response pathways. Overexpression of this gene has been investigated in several cancers, including breast and gastric cancer; however, its role in thyroid cancer remains poorly studied. Generally, PPM1B is involved in multiple cancer-related pathways.	[9], [10]
	KIDINS220	While this gene’s primary role is in nervous system development and regulation of related pathways, it has recently been linked to cancer cell growth because of its involvement in the activation and function of immune T and B cells, which play crucial roles in the body's immune response to tumors.	[11]
	CAMK2G	Calcium/Calmodulin-Dependent Protein Kinase II Gamma has been demonstrated to regulate cell proliferation, migration, and metastasis in multiple types of cancer such as orvan, breat, and colon.	[12]
	AGO3	AGO3 is reported as biomarker for cervical cancer, due its role in activation Wnt/β-catenin signaling pathway . This may suggest its potential role on other cancers.	[13]
LUSC	PSME4	PSME4 is part of the human proteasome gene family (PSM), which plays a role in cancer-related proteostasis. Overexpression of this gene along with other members of the family has been linked to cancer progression and poor survival.	[14], [15]
LIHC	ADCY8	The Adenylyl Cyclase (ADCY) family plays a key role in producing the second messenger cyclic AMP (cAMP), which is crucial for regulating various cellular functions. This family includes ten isoforms: nine transmembrane adenylyl cyclases (tmACs) and one soluble form known as soluble adenylyl cyclase (sAC or ADCY10). ADCY genes have been associated with multiple diseases, including cardiovascular d…	[16 ], [17]
	ADCY5
	ADCY2
	ADCY7
	ADCY4
	ADCY6
	RAPGEF1	C3G (RAPGEF1), a key activator of Rap1 found in many cell signaling pathways, regulates platelet function by modulating angiogenesis, platelet production, and tumor metastasis, and its expression pattern may serve as a biomarker in certain cancer types.	[18], [19]
HNSC	BRD1	BRD1 is frequently overexpressed cancer and functions as an oncogenic regulator of lipid metabolism by epigenetically modulating SREBF1 expression, thereby contributing to tumor progression and representing a potential therapeutic target.	[20]
ESCA	KANSL1	This gene is involved in various cellular processes, including enhancer regulation, cell proliferation, and mitosis. In ovarian cancer, it has been reported as a biomarker and is associated with the immune response	[21]
	TNRC6B	circ-TNRC6B, - a circular RNA derived from the TNRC6B gene- , acts as a tumor suppressor by sponging oncogenic miR-452-5p to upregulate DAG1, and its downregulation is associated with advanced tumor stage and poor prognosis.	[22]
	CAMK2B	This gene reported to be associated wth response to anti-cancer drug, and its mainly affect the tumor micoenviornment.	[23]
References
[1] Bongartz, H., Mehwald, N., Seiß, E.A. et al. Dysregulated Gab1 signalling in triple negative breast cancer. Cell Commun Signal 22, 161 (2024). https://doi.org/10.1186/s12964-024-01542-9
[2] Yang, C., Zhang, Y., Liu, Y., Wu, X., & Sun, F. (2025). Study on the molecular mechanism of UBA52 and BARD1 regulating hepatocellular carcinoma through the PI3 K/AKT signaling pathway. Discover oncology, 16(1), 840. https://doi.org/10.1007/s12672-025-02600-5
[3] Deng, L., Meng, T., Chen, L. et al. The role of ubiquitination in tumorigenesis and targeted drug discovery. Sig Transduct Target Ther 5, 11 (2020). https://doi.org/10.1038/s41392-020-0107-0
[4] Li, F., Shang, Y., Zhang, H., She, J., Wang, G., & Sun, Q. (2021). Development of a novel autophagy-related gene prognostic signature for gastric cancer. Translational cancer research, 10(6), 2790–2800. https://doi.org/10.21037/tcr-21-191
[5] Abid, F., Khan, K., Ashraf, N. M., Badshah, Y., Shabbir, M., Trembley, J. H., Afsar, T., Almajwal, A., & Razak, S. (2024). Genetic Variants at PRKCG Splice and UTR Sites Promote Cancer Susceptibility by Disrupting Epigenetic and miRNA Regulatory Network. Journal of Cancer, 15(20), 6644–6657. https://doi.org/10.7150/jca.100911
[6] Abid, F., Khan, K., Badshah, Y., Ashraf, N. M., Shabbir, M., Hamid, A., Afsar, T., Almajwal, A., & Razak, S. (2023). Non-synonymous SNPs variants of PRKCG and its association with oncogenes predispose to hepatocellular carcinoma. Cancer cell international, 23(1), 123. https://doi.org/10.1186/s12935-023-02965-z
[7] Kafka, A., Bačić, M., Tomas, D., Žarković, K., Bukovac, A., Njirić, N., Mrak, G., Krsnik, Ž., & Pećina-Šlaus, N. (2019). Different behaviour of DVL1, DVL2, DVL3 in astrocytoma malignancy grades and their association to TCF1 and LEF1 upregulation. Journal of cellular and molecular medicine, 23(1), 641–655. https://doi.org/10.1111/jcmm.13969
[8] Yang, S., Shen, T., Yu, M. et al. NHE7 drives endometrial cancer progression by delaying senescence through cAMP/CREB/GRIN2B axis-mediated Ca²⁺ influx. Commun Biol 8, 877 (2025). https://doi.org/10.1038/s42003-025-08296-1
[9] Li, R., Dou, J., Bai, T., Cai, B., & Liu, Y. (2022). Protein Phosphatase PPM1B Inhibits Gastric Cancer Progression and Serves as a Favorable Prognostic Biomarker. Applied immunohistochemistry & molecular morphology : AIMM, 30(5), 366–374. https://doi.org/10.1097/PAI.0000000000001012
[10] Yu, Y., Liu, Q., Ran, Q., & Cao, F. (2024). Overexpression of PPM1B inhibited chemoresistance to temozolomide and proliferation in glioma cells. Cell biology international, 48(2), 143–153. https://doi.org/10.1002/cbin.12092
[11] Raza, M. Z., Allegrini, S., Dumontet, C., & Jordheim, L. P. (2018). Functions of the multi-interacting protein KIDINS220/ARMS in cancer and other pathologies. Genes, chromosomes & cancer, 57(3), 114–122. https://doi.org/10.1002/gcc.22514
[12] He, Q., Li, Z. The dysregulated expression and functional effect of CaMK2 in cancer. Cancer Cell Int 21, 326 (2021). https://doi.org/10.1186/s12935-021-02030-7
[13] Pan, L., Xu, C., Mei, J., Chen, Y., & Wang, D. (2021). Argonaute 3 (AGO3) promotes malignancy potential of cervical cancer via regulation of Wnt/β-catenin signaling pathway. Reproductive biology, 21(1), 100479. https://doi.org/10.1016/j.repbio.2020.100479
[14] Larsson, P., Pettersson, D., Engqvist, H. et al. Pan-cancer analysis of genomic and transcriptomic data reveals the prognostic relevance of human proteasome genes in different cancer types. BMC Cancer 22, 993 (2022). https://doi.org/10.1186/s12885-022-10079-4
[15] Javitt, A., Shmueli, M.D., Kramer, M.P. et al. The proteasome regulator PSME4 modulates proteasome activity and antigen diversity to abrogate antitumor immunity in NSCLC. Nat Cancer 4, 629–647 (2023). https://doi.org/10.1038/s43018-023-00557-4
[16] Gao, Y., Luo, Y., Ji, G., & Wu, T. (2024). Functional and pathological roles of adenylyl cyclases in various diseases. International journal of biological macromolecules, 281(Pt 1), 136198. https://doi.org/10.1016/j.ijbiomac.2024.136198
[17] Wang, H., Luo, W., Ji, J., Qu, M., Jiang, S., Zhang, J., Zhou, Z., Chen, W., Nian, X., Zhang, W., & Wang, Y. (2024). Integrated bioinformatics investigation of adenylyl cyclase family co-expression network in bladder cancer followed by preliminary validation of member 2 (ADCY2) in tumorigenesis and prognosis. Translational cancer research, 13(5), 2222–2237. https://doi.org/10.21037/tcr-23-17…
[18] Huang, W., Ji, R., Ge, S., Zhou, D., Liu, Z., Sun, Y., Huang, W., & Lu, C. (2021). MicroRNA-92b-3p promotes the progression of liver fibrosis by targeting CREB3L2 through the JAK/STAT signaling pathway. Pathology, research and practice, 219, 153367. https://doi.org/10.1016/j.prp.2021.153367
[18] Sequera, C., Manzano, S., Guerrero, C., & Porras, A. (2018). How Rap and its GEFs control liver physiology and cancer development. C3G alterations in human hepatocarcinoma. Hepatic oncology, 5(1), HEP05. https://doi.org/10.2217/hep-2017-0026
[19] Hernández-Cano, L., Fernández-Infante, C., Herranz, Ó., Berrocal, P., Lozano, F. S., Sánchez-Martín, M. A., Porras, A., & Guerrero, C. (2022). New functions of C3G in platelet biology: Contribution to ischemia-induced angiogenesis, tumor metastasis and TPO clearance. Frontiers in cell and developmental biology, 10, 1026287.
[20] Zhang, M., Bai, J., Yuan, H. et al. BRD1 deficiency affects SREBF1-related lipid metabolism through regulating H3K9ac/H3K9me3 transition to inhibit HCC progression. Cell Death Dis 16, 104 (2025). https://doi.org/10.1038/s41419-025-07404-7
[21] Fejzo, M. S., Chen, H. W., Anderson, L., McDermott, M. S., Karlan, B., Konecny, G. E., & Slamon, D. J. (2021). Analysis in epithelial ovarian cancer identifies KANSL1 as a biomarker and target gene for immune response and HDAC inhibition. Gynecologic oncology, 160(2), 539–546. https://doi.org/10.1016/j.ygyno.2020.11.008
[22] Liu, F., Gu, L., Zheng, Y., Sang, M., & Meng, L. (2023). Circular RNA circ-TNRC6B inhibits the proliferation and invasion of esophageal squamous cell carcinoma cells by regulating the miR-452-5p/DAG1 axis. Molecular oncology, 17(7), 1437–1452. https://doi.org/10.1002/1878-0261.13432
[23] Jia, Q., Liao, X., Zhang, Y., Xu, B., Song, Y., Bian, G., & Fu, X. (2022). Anti-Tumor Role of CAMK2B in Remodeling the Stromal Microenvironment and Inhibiting Proliferation in Papillary Renal Cell Carcinoma. Frontiers in oncology, 12, 740051. https://doi.org/10.3389/fonc.2022.740051

## Sheet: S8
Table S8: Results of the KEGG pathway enrichment analysis conducted on newly predicted genes in BRCA, HNSC, and STAD. Only significantly enriched pathways are reported.
BRCA
Category	Subcategory	ID	Description	BgRatio	RichFactor	FoldEnrichment	zScore	pvalue	P.adjust	Qvalue	Count	Gene_symbol
Environmental Information Processing	Signal transduction	hsa04012	ErbB signaling pathway	86/9434	0.244186	76.7884	39.8769	1.37634e-37	2.42237e-35	3.3322e-36	21	GRB2/NRAS/SHC1/SOS1/MAPK1/MAPK3/PIK3CB/PIK3R2/SRC/MAP2K1/JUN/RAF1/MAPK8/PLCG1/PIK3CD/MYC/PIK3R3/AKT3/STAT5B/STAT5A/CBL
Organismal Systems	Endocrine system	hsa04917	Prolactin signaling pathway	71/9434	0.28169	88.5822	41.8376	5.1186e-37	4.50437e-35	6.19621e-36	20	GRB2/NRAS/SHC1/SOS1/MAPK1/MAPK3/PIK3CB/PIK3R2/SRC/MAP2K1/RAF1/MAPK8/PIK3CD/STAT3/PIK3R3/NFKB1/AKT3/STAT5B/STAT5A/STAT1
Human Diseases	Cancer: specific types	hsa05220	Chronic myeloid leukemia	77/9434	0.246753	77.5957	38.1163	9.74445e-34	5.71674e-32	7.86394e-33	19	GRB2/NRAS/SHC1/SOS1/MAPK1/MAPK3/PIK3CB/PIK3R2/MAP2K1/RAF1/PTPN11/PIK3CD/MYC/PIK3R3/NFKB1/AKT3/STAT5B/STAT5A/CBL
Organismal Systems	Nervous system	hsa04722	Neurotrophin signaling pathway	120/9434	0.166667	52.4111	32.0117	6.36535e-32	2.80076e-30	3.85271e-31	20	GRB2/NRAS/SHC1/SOS1/MAPK1/MAPK3/PIK3CB/PIK3R2/MAP2K1/JUN/RAF1/MAPK8/PLCG1/PTPN11/PIK3CD/RAC1/PIK3R3/NFKB1/RHOA/AKT3
Organismal Systems	Immune system	hsa04062	Chemokine signaling pathway	193/9434	0.11399	35.8459	27.6249	1.03702e-31	3.6503e-30	5.02134e-31	22	GRB2/NRAS/SHC1/SOS1/MAPK1/MAPK3/PIK3CB/PIK3R2/SRC/MAP2K1/RAF1/PLCG1/PIK3CG/PIK3CD/RAC1/STAT3/PIK3R3/NFKB1/RHOA/AKT3/STAT5B/STAT1
Human Diseases	Infectious disease: viral	hsa05161	Hepatitis B	163/9434	0.128834	40.5141	28.7417	3.24543e-31	9.51993e-30	1.30956e-30	21	GRB2/NRAS/SOS1/MAPK1/MAPK3/PIK3CB/PIK3R2/SRC/MAP2K1/JUN/RAF1/MAPK8/PIK3CD/MYC/STAT3/PIK3R3/NFKB1/AKT3/STAT5B/STAT5A/STAT1
Human Diseases	Cancer: specific types	hsa05210	Colorectal cancer	87/9434	0.206897	65.0621	33.9042	2.84247e-30	7.14677e-29	9.83109e-30	18	GRB2/NRAS/SOS1/MAPK1/MAPK3/PIK3CB/PIK3R2/MAP2K1/JUN/RAF1/MAPK8/PIK3CD/MYC/RAC1/PIK3R3/CTNNB1/RHOA/AKT3
Human Diseases	Cancer: specific types	hsa05221	Acute myeloid leukemia	68/9434	0.25	78.6167	36.2795	4.89319e-30	1.0765e-28	1.48083e-29	17	GRB2/NRAS/SOS1/MAPK1/MAPK3/PIK3CB/PIK3R2/MAP2K1/RAF1/PIK3CD/MYC/STAT3/PIK3R3/NFKB1/AKT3/STAT5B/STAT5A
Organismal Systems	Immune system	hsa04660	T cell receptor signaling pathway	122/9434	0.155738	48.9743	30.1229	1.49594e-29	2.63285e-28	3.62174e-29	19	GRB2/NRAS/SOS1/MAPK1/MAPK3/PIK3CB/PIK3R2/MAP2K1/JUN/RAF1/MAPK8/PLCG1/PTPN11/PIK3CD/PIK3R3/NFKB1/RHOA/AKT3/FYN
Organismal Systems	Endocrine system	hsa04935	Growth hormone synthesis, secretion and action	122/9434	0.155738	48.9743	30.1229	1.49594e-29	2.63285e-28	3.62174e-29	19	GRB2/NRAS/SHC1/SOS1/MAPK1/MAPK3/PIK3CB/PIK3R2/MAP2K1/RAF1/MAPK8/PLCG1/PIK3CD/STAT3/PIK3R3/AKT3/STAT5B/STAT5A/STAT1
Human Diseases	Infectious disease: viral	hsa05167	Kaposi sarcoma-associated herpesvirus infection	196/9434	0.107143	33.6929	26.1229	1.91225e-29	3.05959e-28	4.20877e-29	21	NRAS/MAPK1/MAPK3/PIK3CB/PIK3R2/SRC/MAP2K1/JUN/RAF1/MAPK8/PLCG1/PIK3CG/PIK3CD/MYC/RAC1/STAT3/PIK3R3/NFKB1/CTNNB1/AKT3/STAT1
Human Diseases	Cancer: overview	hsa05205	Proteoglycans in cancer	204/9434	0.102941	32.3716	25.5847	4.60012e-29	6.74684e-28	9.28095e-29	21	GRB2/NRAS/SOS1/MAPK1/MAPK3/PIK3CB/PIK3R2/SRC/MAP2K1/RAF1/PLCG1/PTPN11/PIK3CD/MYC/RAC1/STAT3/PIK3R3/CTNNB1/RHOA/AKT3/CBL
Organismal Systems	Immune system	hsa04664	Fc epsilon RI signaling pathway	69/9434	0.231884	72.9198	33.8648	1.39028e-27	1.88222e-26	2.58918e-27	16	GRB2/NRAS/SOS1/MAPK1/MAPK3/PIK3CB/PIK3R2/MAP2K1/RAF1/MAPK8/PLCG1/PIK3CD/RAC1/PIK3R3/AKT3/FYN
Human Diseases	Cancer: specific types	hsa05223	Non-small cell lung cancer	73/9434	0.219178	68.9242	32.9044	3.80934e-27	4.78888e-26	6.58758e-27	16	GRB2/NRAS/SOS1/MAPK1/MAPK3/PIK3CB/PIK3R2/MAP2K1/RAF1/PLCG1/PIK3CD/STAT3/PIK3R3/AKT3/STAT5B/STAT5A
Human Diseases	Endocrine and metabolic disease	hsa04933	AGE-RAGE signaling pathway in diabetic complications	101/9434	0.168317	52.93	29.6345	8.33491e-27	9.77963e-26	1.34528e-26	17	NRAS/MAPK1/MAPK3/PIK3CB/PIK3R2/JUN/MAPK8/PLCG1/PIK3CD/RAC1/STAT3/PIK3R3/NFKB1/AKT3/STAT5B/STAT5A/STAT1
Human Diseases	Drug resistance: antineoplastic	hsa01521	EGFR tyrosine kinase inhibitor resistance	80/9434	0.2	62.8933	31.3993	1.92888e-26	2.12176e-25	2.9187e-26	16	GRB2/NRAS/SHC1/SOS1/MAPK1/MAPK3/PIK3CB/PIK3R2/SRC/MAP2K1/RAF1/PLCG1/PIK3CD/STAT3/PIK3R3/AKT3
Environmental Information Processing	Signal transduction	hsa04072	Phospholipase D signaling pathway	149/9434	0.120805	37.9893	25.7044	9.61992e-26	9.95945e-25	1.37002e-25	18	GRB2/NRAS/SHC1/SOS1/MAPK1/MAPK3/PIK3CB/PIK3R2/MAP2K1/RAF1/PLCG1/PIK3CG/PTPN11/PIK3CD/PIK3R3/RHOA/AKT3/FYN
Human Diseases	Cancer: overview	hsa05235	PD-L1 expression and PD-1 checkpoint pathway in cancer	90/9434	0.177778	55.9052	29.5595	1.51446e-25	1.48081e-24	2.037e-25	16	NRAS/MAPK1/MAPK3/PIK3CB/PIK3R2/MAP2K1/JUN/RAF1/PLCG1/PTPN11/PIK3CD/STAT3/PIK3R3/NFKB1/AKT3/STAT1
Human Diseases	Cancer: specific types	hsa05211	Renal cell carcinoma	70/9434	0.214286	67.3857	31.4863	3.26591e-25	3.02526e-24	4.16154e-25	15	GRB2/NRAS/SOS1/MAPK1/MAPK3/PIK3CB/PIK3R2/MAP2K1/JUN/RAF1/PTPN11/PIK3CD/RAC1/PIK3R3/AKT3
Cellular Processes	Cellular community - eukaryotes	hsa04510	Focal adhesion	203/9434	0.0935961	29.4328	23.1299	3.99443e-25	3.5151e-24	4.83536e-25	19	GRB2/SHC1/SOS1/MAPK1/MAPK3/PIK3CB/PIK3R2/SRC/MAP2K1/JUN/RAF1/MAPK8/PIK3CD/RAC1/PIK3R3/CTNNB1/RHOA/AKT3/FYN
Human Diseases	Drug resistance: antineoplastic	hsa01522	Endocrine resistance	99/9434	0.161616	50.8229	28.1461	7.87515e-25	6.25623e-24	8.60605e-25	16	GRB2/NRAS/SHC1/SOS1/MAPK1/MAPK3/PIK3CB/PIK3R2/SRC/MAP2K1/JUN/RAF1/MAPK8/PIK3CD/PIK3R3/AKT3
Human Diseases	Cancer: overview	hsa05231	Choline metabolism in cancer	99/9434	0.161616	50.8229	28.1461	7.87515e-25	6.25623e-24	8.60605e-25	16	GRB2/NRAS/SOS1/MAPK1/MAPK3/PIK3CB/PIK3R2/MAP2K1/JUN/RAF1/MAPK8/PLCG1/PIK3CD/RAC1/PIK3R3/AKT3
Organismal Systems	Endocrine system	hsa04926	Relaxin signaling pathway	130/9434	0.130769	41.1226	26.0169	8.17575e-25	6.25623e-24	8.60605e-25	17	GRB2/NRAS/SHC1/SOS1/MAPK1/MAPK3/PIK3CB/PIK3R2/SRC/MAP2K1/JUN/RAF1/MAPK8/PIK3CD/PIK3R3/NFKB1/AKT3
Human Diseases	Cancer: overview	hsa05207	Chemical carcinogenesis - receptor activation	217/9434	0.0875576	27.5339	22.334	1.47901e-24	1.08461e-23	1.49199e-24	19	GRB2/NRAS/SOS1/MAPK1/MAPK3/PIK3CB/PIK3R2/SRC/MAP2K1/JUN/RAF1/PIK3CD/MYC/STAT3/PIK3R3/NFKB1/AKT3/STAT5B/STAT5A
Organismal Systems	Immune system	hsa04625	C-type lectin receptor signaling pathway	105/9434	0.152381	47.9187	27.3057	2.16259e-24	1.52246e-23	2.09429e-24	16	NRAS/MAPK1/MAPK3/PIK3CB/PIK3R2/SRC/JUN/RAF1/MAPK8/PTPN11/PIK3CD/PIK3R3/NFKB1/RHOA/AKT3/STAT1
Human Diseases	Infectious disease: viral	hsa05163	Human cytomegalovirus infection	226/9434	0.0840708	26.4375	21.8612	3.27573e-24	2.21742e-23	3.05027e-24	19	GRB2/NRAS/SOS1/MAPK1/MAPK3/PIK3CB/PIK3R2/SRC/MAP2K1/RAF1/PIK3CD/MYC/RAC1/STAT3/PIK3R3/NFKB1/CTNNB1/RHOA/AKT3
Human Diseases	Cancer: specific types	hsa05213	Endometrial cancer	59/9434	0.237288	74.6192	32.0377	3.58281e-24	2.33546e-23	3.21265e-24	14	GRB2/NRAS/SOS1/MAPK1/MAPK3/PIK3CB/PIK3R2/MAP2K1/RAF1/PIK3CD/MYC/PIK3R3/CTNNB1/AKT3
Environmental Information Processing	Signal transduction	hsa04014	Ras signaling pathway	238/9434	0.0798319	25.1045	21.2724	8.99092e-24	5.65144e-23	7.77411e-24	19	GRB2/NRAS/SHC1/SOS1/MAPK1/MAPK3/PIK3CB/PIK3R2/MAP2K1/RAF1/MAPK8/PLCG1/PTPN11/PIK3CD/RAC1/PIK3R3/NFKB1/RHOA/AKT3
Organismal Systems	Immune system	hsa04662	B cell receptor signaling pathway	91/9434	0.164835	51.8352	27.5214	2.40503e-23	1.45961e-22	2.00783e-23	15	GRB2/NRAS/SOS1/MAPK1/MAPK3/PIK3CB/PIK3R2/MAP2K1/JUN/RAF1/PIK3CD/RAC1/PIK3R3/NFKB1/AKT3
Human Diseases	Infectious disease: viral	hsa05160	Hepatitis C	159/9434	0.106918	33.6222	23.4307	2.96794e-23	1.74119e-22	2.39518e-23	17	GRB2/NRAS/SOS1/MAPK1/MAPK3/PIK3CB/PIK3R2/MAP2K1/RAF1/PIK3CD/MYC/STAT3/PIK3R3/NFKB1/CTNNB1/AKT3/STAT1
Organismal Systems	Immune system	hsa04650	Natural killer cell mediated cytotoxicity	134/9434	0.119403	37.5483	24.0662	1.34804e-22	7.65339e-22	1.0528e-22	16	GRB2/NRAS/SHC1/SOS1/MAPK1/MAPK3/PIK3CB/PIK3R2/MAP2K1/RAF1/PLCG1/PTPN11/PIK3CD/RAC1/PIK3R3/FYN
Human Diseases	Cancer: specific types	hsa05214	Glioma	76/9434	0.184211	57.9281	28.143	1.80206e-22	9.91134e-22	1.3634e-22	14	GRB2/NRAS/SHC1/SOS1/MAPK1/MAPK3/PIK3CB/PIK3R2/MAP2K1/RAF1/PLCG1/PIK3CD/PIK3R3/AKT3
Human Diseases	Cancer: specific types	hsa05212	Pancreatic cancer	77/9434	0.181818	57.1758	27.9547	2.19901e-22	1.1728e-21	1.61331e-22	14	MAPK1/MAPK3/PIK3CB/PIK3R2/MAP2K1/RAF1/MAPK8/PIK3CD/RAC1/STAT3/PIK3R3/NFKB1/AKT3/STAT1
Human Diseases	Cancer: overview	hsa05208	Chemical carcinogenesis - reactive oxygen species	227/9434	0.0792952	24.9357	20.6172	2.49255e-22	1.29026e-21	1.77488e-22	18	GRB2/NRAS/SOS1/MAPK1/MAPK3/PIK3CB/PIK3R2/SRC/MAP2K1/JUN/RAF1/MAPK8/PTPN11/PIK3CD/RAC1/PIK3R3/NFKB1/AKT3
Human Diseases	Cancer: specific types	hsa05224	Breast cancer	148/9434	0.108108	33.9964	22.8514	7.10128e-22	3.57093e-21	4.91216e-22	16	GRB2/NRAS/SHC1/SOS1/MAPK1/MAPK3/PIK3CB/PIK3R2/MAP2K1/JUN/RAF1/PIK3CD/MYC/PIK3R3/CTNNB1/AKT3
Environmental Information Processing	Signal transduction	hsa04370	VEGF signaling pathway	60/9434	0.216667	68.1344	29.4637	7.65707e-22	3.74346e-21	5.14949e-22	13	NRAS/MAPK1/MAPK3/PIK3CB/PIK3R2/SRC/MAP2K1/RAF1/PLCG1/PIK3CD/RAC1/PIK3R3/AKT3
Environmental Information Processing	Signal transduction	hsa04071	Sphingolipid signaling pathway	122/9434	0.122951	38.6639	23.649	2.57718e-21	1.19364e-20	1.64197e-21	15	NRAS/MAPK1/MAPK3/PIK3CB/PIK3R2/MAP2K1/RAF1/MAPK8/PIK3CD/RAC1/PIK3R3/NFKB1/RHOA/AKT3/FYN
Organismal Systems	Endocrine system	hsa04919	Thyroid hormone signaling pathway	122/9434	0.122951	38.6639	23.649	2.57718e-21	1.19364e-20	1.64197e-21	15	NRAS/MAPK1/MAPK3/PIK3CB/PIK3R2/SRC/MAP2K1/RAF1/PLCG1/PIK3CD/MYC/PIK3R3/CTNNB1/AKT3/STAT1
Human Diseases	Cancer: specific types	hsa05225	Hepatocellular carcinoma	170/9434	0.0941176	29.5969	21.2507	7.07219e-21	3.19155e-20	4.39029e-21	16	GRB2/NRAS/SHC1/SOS1/MAPK1/MAPK3/PIK3CB/PIK3R2/MAP2K1/RAF1/PLCG1/PIK3CD/MYC/PIK3R3/CTNNB1/AKT3
Organismal Systems	Endocrine system	hsa04910	Insulin signaling pathway	138/9434	0.108696	34.1812	22.1775	1.77954e-20	7.639e-20	1.05082e-20	15	GRB2/NRAS/SHC1/SOS1/MAPK1/MAPK3/PIK3CB/PIK3R2/MAP2K1/RAF1/MAPK8/PIK3CD/PIK3R3/AKT3/CBL
Human Diseases	Infectious disease: bacterial	hsa05135	Yersinia infection	138/9434	0.108696	34.1812	22.1775	1.77954e-20	7.639e-20	1.05082e-20	15	MAPK1/MAPK3/PIK3CB/PIK3R2/SRC/MAP2K1/JUN/MAPK8/PLCG1/PIK3CD/RAC1/PIK3R3/NFKB1/RHOA/AKT3
Organismal Systems	Endocrine system	hsa04915	Estrogen signaling pathway	139/9434	0.107914	33.9353	22.0939	1.99179e-20	8.34657e-20	1.14815e-20	15	GRB2/NRAS/SHC1/SOS1/MAPK1/MAPK3/PIK3CB/PIK3R2/SRC/MAP2K1/JUN/RAF1/PIK3CD/PIK3R3/AKT3
Human Diseases	Cancer: specific types	hsa05215	Prostate cancer	106/9434	0.132075	41.5333	23.7028	2.6421e-20	1.08142e-19	1.48759e-20	14	GRB2/NRAS/SOS1/MAPK1/MAPK3/PIK3CB/PIK3R2/MAP2K1/RAF1/PIK3CD/PIK3R3/NFKB1/CTNNB1/AKT3
Organismal Systems	Development and regeneration	hsa04380	Osteoclast differentiation	143/9434	0.104895	32.986	21.7684	3.09953e-20	1.23981e-19	1.70548e-20	15	GRB2/MAPK1/MAPK3/PIK3CB/PIK3R2/MAP2K1/JUN/MAPK8/PIK3CD/RAC1/PIK3R3/NFKB1/AKT3/STAT1/FYN
Human Diseases	Cancer: specific types	hsa05226	Gastric cancer	150/9434	0.1	31.4467	21.2299	6.5158e-20	2.5484e-19	3.50558e-20	15	GRB2/NRAS/SHC1/SOS1/MAPK1/MAPK3/PIK3CB/PIK3R2/MAP2K1/RAF1/PIK3CD/MYC/PIK3R3/CTNNB1/AKT3
Human Diseases	Cancer: overview	hsa05203	Viral carcinogenesis	205/9434	0.0780488	24.5437	19.2488	1.52842e-19	5.84788e-19	8.04434e-20	16	GRB2/NRAS/MAPK1/MAPK3/PIK3CB/PIK3R2/SRC/JUN/PIK3CD/RAC1/STAT3/PIK3R3/NFKB1/RHOA/STAT5B/STAT5A
Human Diseases	Cardiovascular disease	hsa05417	Lipid and atherosclerosis	216/9434	0.0740741	23.2938	18.7207	3.583e-19	1.34172e-18	1.84567e-19	16	NRAS/MAPK1/MAPK3/PIK3CB/PIK3R2/SRC/JUN/MAPK8/PLCG1/PIK3CD/RAC1/STAT3/PIK3R3/NFKB1/RHOA/AKT3
Environmental Information Processing	Signal transduction	hsa04068	FoxO signaling pathway	133/9434	0.105263	33.1018	21.0581	7.32511e-19	2.68587e-18	3.69468e-19	14	GRB2/NRAS/SOS1/MAPK1/MAPK3/PIK3CB/PIK3R2/MAP2K1/RAF1/MAPK8/PIK3CD/STAT3/PIK3R3/AKT3
Cellular Processes	Cellular community - eukaryotes	hsa04550	Signaling pathways regulating pluripotency of stem cells	144/9434	0.0972222	30.5731	20.1976	2.31522e-18	8.3159e-18	1.14393e-18	14	GRB2/NRAS/MAPK1/MAPK3/PIK3CB/PIK3R2/MAP2K1/RAF1/PIK3CD/MYC/STAT3/PIK3R3/CTNNB1/AKT3
Organismal Systems	Immune system	hsa04620	Toll-like receptor signaling pathway	109/9434	0.119266	37.5052	21.6507	3.19001e-18	1.12288e-17	1.54464e-18	13	MAPK1/MAPK3/PIK3CB/PIK3R2/MAP2K1/JUN/MAPK8/PIK3CD/RAC1/PIK3R3/NFKB1/AKT3/STAT1
Human Diseases	Cancer: overview	hsa05206	MicroRNAs in cancer	319/9434	0.0532915	16.7584	16.1718	5.21326e-18	1.79909e-17	2.47482e-18	17	GRB2/NRAS/SHC1/SOS1/MAPK1/MAPK3/PIK3CB/PIK3R2/MAP2K1/RAF1/PLCG1/PIK3CD/MYC/STAT3/PIK3R3/NFKB1/RHOA
Environmental Information Processing	Signal transduction	hsa04015	Rap1 signaling pathway	212/9434	0.0707547	22.25	17.6744	1.32098e-17	4.47102e-17	6.15033e-18	15	NRAS/MAPK1/MAPK3/PIK3CB/PIK3R2/SRC/MAP2K1/RAF1/PLCG1/PIK3CD/RAC1/PIK3R3/CTNNB1/RHOA/AKT3
Human Diseases	Infectious disease: viral	hsa05170	Human immunodeficiency virus 1 infection	213/9434	0.0704225	22.1455	17.6299	1.4189e-17	4.71181e-17	6.48155e-18	15	NRAS/MAPK1/MAPK3/PIK3CB/PIK3R2/MAP2K1/JUN/RAF1/MAPK8/PLCG1/PIK3CD/RAC1/PIK3R3/NFKB1/AKT3
Environmental Information Processing	Signal transduction	hsa04630	JAK-STAT signaling pathway	168/9434	0.0833333	26.2056	18.618	2.12195e-17	6.91598e-17	9.5136e-18	14	GRB2/SOS1/PIK3CB/PIK3R2/RAF1/PTPN11/PIK3CD/MYC/STAT3/PIK3R3/AKT3/STAT5B/STAT5A/STAT1
Human Diseases	Infectious disease: viral	hsa05166	Human T-cell leukemia virus 1 infection	224/9434	0.0669643	21.058	17.1598	3.04582e-17	9.74661e-17	1.34074e-17	15	NRAS/MAPK1/MAPK3/PIK3CB/PIK3R2/MAP2K1/JUN/MAPK8/PIK3CD/MYC/PIK3R3/NFKB1/AKT3/STAT5B/STAT5A
Cellular Processes	Cell growth and death	hsa04210	Apoptosis	137/9434	0.0948905	29.8399	19.2049	6.95446e-17	2.18569e-16	3.00663e-17	13	NRAS/MAPK1/MAPK3/PIK3CB/PIK3R2/MAP2K1/JUN/RAF1/MAPK8/PIK3CD/PIK3R3/NFKB1/AKT3
Organismal Systems	Development and regeneration	hsa04360	Axon guidance	184/9434	0.076087	23.9268	17.7383	7.76661e-17	2.39811e-16	3.29884e-17	14	NRAS/MAPK1/MAPK3/PIK3CB/PIK3R2/SRC/RAF1/PLCG1/PTPN11/PIK3CD/RAC1/PIK3R3/RHOA/FYN
Human Diseases	Cancer: overview	hsa05230	Central carbon metabolism in cancer	71/9434	0.15493	48.7202	22.7957	9.53779e-17	2.89423e-16	3.98129e-17	11	NRAS/MAPK1/MAPK3/PIK3CB/PIK3R2/MAP2K1/RAF1/PIK3CD/MYC/PIK3R3/AKT3
Human Diseases	Infectious disease: bacterial	hsa05132	Salmonella infection	251/9434	0.059761	18.7928	16.1369	1.69837e-16	5.06632e-16	6.96922e-17	15	MAPK1/MAPK3/PIK3CB/MAP2K1/JUN/RAF1/MAPK8/PIK3CG/PIK3CD/MYC/RAC1/NFKB1/CTNNB1/RHOA/AKT3
Environmental Information Processing	Signal transduction	hsa04150	mTOR signaling pathway	158/9434	0.0822785	25.8738	17.8082	4.64317e-16	1.362e-15	1.87356e-16	13	GRB2/NRAS/SOS1/MAPK1/MAPK3/PIK3CB/PIK3R2/MAP2K1/RAF1/PIK3CD/PIK3R3/RHOA/AKT3
Environmental Information Processing	Signal transduction	hsa04151	PI3K-Akt signaling pathway	362/9434	0.0441989	13.8991	14.1348	1.4203e-15	4.03408e-15	5.54928e-16	16	GRB2/NRAS/SOS1/MAPK1/MAPK3/PIK3CB/PIK3R2/MAP2K1/RAF1/PIK3CG/PIK3CD/MYC/RAC1/PIK3R3/NFKB1/AKT3
Environmental Information Processing	Signal transduction	hsa04024	cAMP signaling pathway	226/9434	0.0619469	19.4802	15.8821	1.4211e-15	4.03408e-15	5.54928e-16	14	MAPK1/MAPK3/PIK3CB/PIK3R2/MAP2K1/JUN/RAF1/MAPK8/PIK3CD/RAC1/PIK3R3/NFKB1/RHOA/AKT3
Cellular Processes	Cell motility	hsa04810	Regulation of actin cytoskeleton	232/9434	0.0603448	18.9764	15.658	2.05319e-15	5.73589e-15	7.89028e-16	14	NRAS/SOS1/MAPK1/MAPK3/PIK3CB/PIK3R2/SRC/MAP2K1/RAF1/PIK3CD/RAC1/PIK3R3/RHOA/AKT3
Organismal Systems	Endocrine system	hsa04929	GnRH secretion	65/9434	0.153846	48.3795	21.6486	3.15723e-15	8.68237e-15	1.19435e-15	10	NRAS/MAPK1/MAPK3/PIK3CB/PIK3R2/MAP2K1/RAF1/PIK3CD/PIK3R3/AKT3
Organismal Systems	Immune system	hsa04666	Fc gamma R-mediated phagocytosis	99/9434	0.111111	34.9407	19.1739	4.45679e-15	1.19063e-14	1.63783e-15	11	MAPK1/MAPK3/PIK3CB/PIK3R2/MAP2K1/RAF1/PLCG1/PIK3CD/RAC1/PIK3R3/AKT3
Human Diseases	Infectious disease: viral	hsa05162	Measles	139/9434	0.0863309	27.1482	17.541	4.46487e-15	1.19063e-14	1.63783e-15	12	PIK3CB/PIK3R2/JUN/MAPK8/PIK3CD/STAT3/PIK3R3/NFKB1/AKT3/STAT5B/STAT5A/STAT1
Human Diseases	Cardiovascular disease	hsa05418	Fluid shear stress and atherosclerosis	142/9434	0.084507	26.5746	17.3432	5.7993e-15	1.5234e-14	2.09558e-15	12	PIK3CB/PIK3R2/SRC/JUN/MAPK8/PIK3CD/RAC1/PIK3R3/NFKB1/CTNNB1/RHOA/AKT3
Human Diseases	Infectious disease: bacterial	hsa05131	Shigellosis	253/9434	0.055336	17.4013	14.9356	6.90545e-15	1.78729e-14	2.4586e-15	14	MAPK1/MAPK3/PIK3CB/PIK3R2/SRC/JUN/MAPK8/PLCG1/PIK3CD/RAC1/PIK3R3/NFKB1/RHOA/AKT3
Organismal Systems	Immune system	hsa04613	Neutrophil extracellular trap formation	196/9434	0.0663265	20.8575	15.8669	7.92813e-15	2.02225e-14	2.7818e-15	13	MAPK1/MAPK3/PIK3CB/PIK3R2/SRC/MAP2K1/RAF1/PLCG1/PIK3CD/RAC1/PIK3R3/NFKB1/AKT3
Human Diseases	Cancer: specific types	hsa05218	Melanoma	73/9434	0.136986	43.0776	20.3836	1.07894e-14	2.71276e-14	3.73167e-15	10	NRAS/MAPK1/MAPK3/PIK3CB/PIK3R2/MAP2K1/RAF1/PIK3CD/PIK3R3/AKT3
Human Diseases	Infectious disease: viral	hsa05165	Human papillomavirus infection	333/9434	0.045045	14.1652	13.8144	1.15684e-14	2.86765e-14	3.94474e-15	15	GRB2/NRAS/SOS1/MAPK1/MAPK3/PIK3CB/PIK3R2/MAP2K1/RAF1/PIK3CD/PIK3R3/NFKB1/CTNNB1/AKT3/STAT1
Environmental Information Processing	Signal transduction	hsa04066	HIF-1 signaling pathway	110/9434	0.1	31.4467	18.1411	1.47682e-14	3.61e-14	4.96591e-15	11	MAPK1/MAPK3/PIK3CB/PIK3R2/MAP2K1/PLCG1/PIK3CD/STAT3/PIK3R3/NFKB1/AKT3
Cellular Processes	Cell growth and death	hsa04218	Cellular senescence	157/9434	0.0764331	24.0357	16.439	1.97429e-14	4.75994e-14	6.54776e-15	12	NRAS/MAPK1/MAPK3/PIK3CB/PIK3R2/MAP2K1/RAF1/PIK3CD/MYC/PIK3R3/NFKB1/AKT3
Human Diseases	Infectious disease: bacterial	hsa05100	Bacterial invasion of epithelial cells	78/9434	0.128205	40.3162	19.6926	2.16397e-14	5.14675e-14	7.07985e-15	10	SHC1/PIK3CB/PIK3R2/SRC/PIK3CD/RAC1/PIK3R3/CTNNB1/RHOA/CBL
Organismal Systems	Nervous system	hsa04725	Cholinergic synapse	116/9434	0.0948276	29.8201	17.6398	2.69255e-14	6.31851e-14	8.69173e-15	11	NRAS/MAPK1/MAPK3/PIK3CB/PIK3R2/MAP2K1/PIK3CG/PIK3CD/PIK3R3/AKT3/FYN
Environmental Information Processing	Signal transduction	hsa04668	TNF signaling pathway	119/9434	0.092437	29.0683	17.4032	3.59114e-14	8.31633e-14	1.14399e-14	11	MAPK1/MAPK3/PIK3CB/PIK3R2/MAP2K1/JUN/MAPK8/PIK3CD/PIK3R3/NFKB1/AKT3
Organismal Systems	Immune system	hsa04611	Platelet activation	126/9434	0.0873016	27.4534	16.8837	6.83042e-14	1.56124e-13	2.14764e-14	11	MAPK1/MAPK3/PIK3CB/PIK3R2/SRC/PIK3CG/PIK3CD/PIK3R3/RHOA/AKT3/FYN
Organismal Systems	Endocrine system	hsa04912	GnRH signaling pathway	93/9434	0.107527	33.8136	17.9609	1.34954e-13	3.04511e-13	4.18885e-14	10	GRB2/NRAS/SOS1/MAPK1/MAPK3/SRC/MAP2K1/JUN/RAF1/MAPK8
Human Diseases	Infectious disease: parasitic	hsa05142	Chagas disease	103/9434	0.0970874	30.5307	17.0199	3.86464e-13	8.60984e-13	1.18437e-13	10	MAPK1/MAPK3/PIK3CB/PIK3R2/JUN/MAPK8/PIK3CD/PIK3R3/NFKB1/AKT3
Human Diseases	Infectious disease: viral	hsa05169	Epstein-Barr virus infection	204/9434	0.0588235	18.498	14.2703	4.65141e-13	1.02331e-12	1.40766e-13	12	PIK3CB/PIK3R2/JUN/MAPK8/PIK3CD/MYC/RAC1/STAT3/PIK3R3/NFKB1/AKT3/STAT1
Organismal Systems	Immune system	hsa04659	Th17 cell differentiation	109/9434	0.0917431	28.8502	16.5176	6.90311e-13	1.49994e-12	2.06331e-13	10	MAPK1/MAPK3/JUN/MAPK8/PLCG1/STAT3/NFKB1/STAT5B/STAT5A/STAT1
Organismal Systems	Endocrine system	hsa04914	Progesterone-mediated oocyte maturation	111/9434	0.0900901	28.3303	16.359	8.31282e-13	1.78421e-12	2.45436e-13	10	MAPK1/MAPK3/PIK3CB/PIK3R2/MAP2K1/RAF1/MAPK8/PIK3CD/PIK3R3/AKT3
Cellular Processes	Transport and catabolism	hsa04140	Autophagy - animal	169/9434	0.0650888	20.4682	14.4237	1.79013e-12	3.79593e-12	5.22167e-13	11	NRAS/MAPK1/MAPK3/PIK3CB/PIK3R2/MAP2K1/RAF1/MAPK8/PIK3CD/PIK3R3/AKT3
Environmental Information Processing	Signal transduction	hsa04010	MAPK signaling pathway	300/9434	0.0433333	13.6269	12.5532	1.93708e-12	4.05863e-12	5.58305e-13	13	GRB2/NRAS/SOS1/MAPK1/MAPK3/MAP2K1/JUN/RAF1/MAPK8/MYC/RAC1/NFKB1/AKT3
Human Diseases	Infectious disease: viral	hsa05164	Influenza A	173/9434	0.0635838	19.995	14.2417	2.31626e-12	4.79602e-12	6.5974e-13	11	MAPK1/MAPK3/PIK3CB/PIK3R2/MAP2K1/RAF1/PIK3CD/PIK3R3/NFKB1/AKT3/STAT1
Human Diseases	Infectious disease: viral	hsa05171	Coronavirus disease - COVID-19	238/9434	0.0504202	15.8555	13.1101	2.91877e-12	5.9733e-12	8.21686e-13	12	MAPK1/MAPK3/PIK3CB/PIK3R2/JUN/MAPK8/PLCG1/PIK3CD/STAT3/PIK3R3/NFKB1/STAT1
Organismal Systems	Immune system	hsa04658	Th1 and Th2 cell differentiation	93/9434	0.0967742	30.4323	16.1101	7.15075e-12	1.44659e-11	1.98993e-12	9	MAPK1/MAPK3/JUN/MAPK8/PLCG1/NFKB1/STAT5B/STAT5A/STAT1
Human Diseases	Endocrine and metabolic disease	hsa04931	Insulin resistance	109/9434	0.0825688	25.9651	14.8065	3.06876e-11	6.13753e-11	8.44277e-12	9	PIK3CB/PIK3R2/MAPK8/PTPN11/PIK3CD/STAT3/PIK3R3/NFKB1/AKT3
Human Diseases	Cancer: specific types	hsa05219	Bladder cancer	41/9434	0.170732	53.6894	19.096	3.23227e-11	6.3919e-11	8.79269e-12	7	NRAS/MAPK1/MAPK3/SRC/MAP2K1/RAF1/MYC
Organismal Systems	Immune system	hsa04670	Leukocyte transendothelial migration	116/9434	0.0775862	24.3983	14.3212	5.41022e-11	1.058e-10	1.45538e-11	9	PIK3CB/PIK3R2/PLCG1/PTPN11/PIK3CD/RAC1/PIK3R3/CTNNB1/RHOA
Human Diseases	Neurodegenerative disease	hsa05010	Alzheimer disease	391/9434	0.0332481	10.4554	10.7855	5.51435e-11	1.06651e-10	1.46709e-11	13	NRAS/MAPK1/MAPK3/PIK3CB/PIK3R2/MAP2K1/RAF1/MAPK8/PIK3CD/PIK3R3/NFKB1/CTNNB1/AKT3
Human Diseases	Endocrine and metabolic disease	hsa04930	Type II diabetes mellitus	47/9434	0.148936	46.8355	17.7917	8.92657e-11	1.70769e-10	2.3491e-11	7	MAPK1/MAPK3/PIK3CB/PIK3R2/MAPK8/PIK3CD/PIK3R3
Cellular Processes	Cellular community - eukaryotes	hsa04540	Gap junction	92/9434	0.0869565	27.3449	14.3417	2.94778e-10	5.57859e-10	7.6739e-11	8	GRB2/NRAS/SOS1/MAPK1/MAPK3/SRC/MAP2K1/RAF1
Human Diseases	Infectious disease: bacterial	hsa05130	Pathogenic Escherichia coli infection	203/9434	0.0492611	15.491	11.7883	3.52289e-10	6.59606e-10	9.07352e-11	10	MAPK1/MAPK3/SRC/JUN/MAPK8/PTPN11/RAC1/NFKB1/RHOA/FYN
Organismal Systems	Endocrine system	hsa04921	Oxytocin signaling pathway	155/9434	0.0580645	18.2594	12.2368	7.36524e-10	1.36451e-09	1.87701e-10	9	NRAS/MAPK1/MAPK3/SRC/MAP2K1/JUN/RAF1/PIK3CG/RHOA
Human Diseases	Endocrine and metabolic disease	hsa04932	Non-alcoholic fatty liver disease	157/9434	0.0573248	18.0268	12.1509	8.25789e-10	1.51395e-09	2.08258e-10	9	PIK3CB/PIK3R2/JUN/MAPK8/PIK3CD/RAC1/PIK3R3/NFKB1/AKT3
Human Diseases	Cancer: specific types	hsa05216	Thyroid cancer	37/9434	0.162162	50.9946	17.2091	1.31954e-09	2.39422e-09	3.29349e-10	6	NRAS/MAPK1/MAPK3/MAP2K1/MYC/CTNNB1
Human Diseases	Infectious disease: parasitic	hsa05145	Toxoplasmosis	112/9434	0.0714286	22.4619	12.9048	1.44418e-09	2.59363e-09	3.56779e-10	8	MAPK1/MAPK3/MAPK8/PIK3CG/STAT3/NFKB1/AKT3/STAT1
Organismal Systems	Excretory system	hsa04960	Aldosterone-regulated sodium reabsorption	38/9434	0.157895	49.6526	16.9729	1.56353e-09	2.77962e-09	3.82363e-10	6	MAPK1/MAPK3/PIK3CB/PIK3R2/PIK3CD/PIK3R3
Human Diseases	Infectious disease: bacterial	hsa05120	Epithelial cell signaling in Helicobacter pylori infection	71/9434	0.0985915	31.0038	14.3327	1.79293e-09	3.15556e-09	4.34079e-10	7	SRC/JUN/MAPK8/PLCG1/PTPN11/RAC1/NFKB1
Human Diseases	Drug resistance: antineoplastic	hsa01524	Platinum drug resistance	75/9434	0.0933333	29.3502	13.922	2.65304e-09	4.62313e-09	6.35957e-10	7	MAPK1/MAPK3/PIK3CB/PIK3R2/PIK3CD/PIK3R3/AKT3
Human Diseases	Infectious disease: bacterial	hsa05152	Tuberculosis	182/9434	0.0494505	15.5505	11.1951	3.06557e-09	5.23826e-09	7.20573e-10	9	MAPK1/MAPK3/SRC/RAF1/MAPK8/NFKB1/RHOA/AKT3/STAT1
Human Diseases	Infectious disease: viral	hsa05168	Herpes simplex virus 1 infection	182/9434	0.0494505	15.5505	11.1951	3.06557e-09	5.23826e-09	7.20573e-10	9	PIK3CB/PIK3R2/SRC/PTPN11/PIK3CD/PIK3R3/NFKB1/AKT3/STAT1
Organismal Systems	Aging	hsa04211	Longevity regulating pathway	90/9434	0.0777778	24.4585	12.6295	9.67024e-09	1.6365e-08	2.25117e-09	7	NRAS/PIK3CB/PIK3R2/PIK3CD/PIK3R3/NFKB1/AKT3
Cellular Processes	Cellular community - eukaryotes	hsa04520	Adherens junction	93/9434	0.0752688	23.6695	12.4084	1.2183e-08	2.02284e-08	2.78261e-09	7	MAPK1/MAPK3/SRC/RAC1/CTNNB1/RHOA/FYN
Human Diseases	Cancer: specific types	hsa05222	Small cell lung cancer	93/9434	0.0752688	23.6695	12.4084	1.2183e-08	2.02284e-08	2.78261e-09	7	PIK3CB/PIK3R2/PIK3CD/MYC/PIK3R3/NFKB1/AKT3
NA	NA	hsa04081	Hormone signaling	219/9434	0.0410959	12.9233	10.0832	1.55626e-08	2.55982e-08	3.52129e-09	9	PIK3CB/PIK3R2/SRC/PIK3CD/STAT3/PIK3R3/RHOA/STAT5B/STAT5A
Organismal Systems	Sensory system	hsa04750	Inflammatory mediator regulation of TRP channels	99/9434	0.0707071	22.235	11.9962	1.88994e-08	3.0799e-08	4.23671e-09	7	PIK3CB/PIK3R2/SRC/MAPK8/PLCG1/PIK3CD/PIK3R3
Organismal Systems	Aging	hsa04213	Longevity regulating pathway - multiple species	62/9434	0.0967742	30.4323	13.132	3.30349e-08	5.33407e-08	7.33753e-09	6	NRAS/PIK3CB/PIK3R2/PIK3CD/PIK3R3/AKT3
Human Diseases	Substance dependence	hsa05034	Alcoholism	191/9434	0.0418848	13.1714	9.59797	9.74429e-08	1.55909e-07	2.14468e-08	8	GRB2/NRAS/SHC1/SOS1/MAPK1/MAPK3/MAP2K1/RAF1
Human Diseases	Neurodegenerative disease	hsa05020	Prion disease	278/9434	0.0323741	10.1806	8.77543	1.22356e-07	1.94006e-07	2.66874e-08	9	MAPK1/MAPK3/PIK3CB/PIK3R2/MAPK8/PIK3CD/RAC1/PIK3R3/FYN
Human Diseases	Infectious disease: bacterial	hsa05133	Pertussis	78/9434	0.0769231	24.1897	11.6152	1.33271e-07	2.09426e-07	2.88086e-08	6	MAPK1/MAPK3/JUN/MAPK8/NFKB1/RHOA
Human Diseases	Cardiovascular disease	hsa05415	Diabetic cardiomyopathy	205/9434	0.0390244	12.2719	9.21563	1.68338e-07	2.6219e-07	3.60669e-08	8	PIK3CB/PIK3R2/MAPK8/PIK3CD/RAC1/PIK3R3/NFKB1/AKT3
Environmental Information Processing	Signal transduction	hsa04371	Apelin signaling pathway	140/9434	0.05	15.7233	9.91284	2.08748e-07	3.22277e-07	4.43324e-08	7	NRAS/MAPK1/MAPK3/MAP2K1/RAF1/PIK3CG/AKT3
Organismal Systems	Digestive system	hsa04973	Carbohydrate digestion and absorption	52/9434	0.0961538	30.2372	11.9404	5.36559e-07	8.21168e-07	1.1296e-07	5	PIK3CB/PIK3R2/PIK3CD/PIK3R3/AKT3
Organismal Systems	Endocrine system	hsa04916	Melanogenesis	101/9434	0.0594059	18.6812	10.09	6.25237e-07	9.48635e-07	1.30494e-07	6	NRAS/MAPK1/MAPK3/MAP2K1/RAF1/CTNNB1
Environmental Information Processing	Signal transduction	hsa04022	cGMP-PKG signaling pathway	166/9434	0.0421687	13.2606	9.00126	6.66263e-07	1.00224e-06	1.37868e-07	7	MAPK1/MAPK3/MAP2K1/RAF1/PIK3CG/RHOA/AKT3
Organismal Systems	Endocrine system	hsa04923	Regulation of lipolysis in adipocytes	59/9434	0.0847458	26.6497	11.1623	1.01767e-06	1.51789e-06	2.088e-07	5	PIK3CB/PIK3R2/PIK3CD/PIK3R3/AKT3
Organismal Systems	Nervous system	hsa04730	Long-term depression	60/9434	0.0833333	26.2056	11.0621	1.10773e-06	1.63833e-06	2.25368e-07	5	NRAS/MAPK1/MAPK3/MAP2K1/RAF1
Human Diseases	Neurodegenerative disease	hsa05022	Pathways of neurodegeneration - multiple diseases	483/9434	0.0207039	6.5107	7.02221	1.34041e-06	1.96594e-06	2.70434e-07	10	NRAS/MAPK1/MAPK3/MAP2K1/RAF1/MAPK8/PLCG1/RAC1/NFKB1/CTNNB1
Organismal Systems	Immune system	hsa04621	NOD-like receptor signaling pathway	189/9434	0.037037	11.6469	8.35084	1.5974e-06	2.32349e-06	3.19619e-07	7	MAPK1/MAPK3/JUN/MAPK8/NFKB1/RHOA/STAT1
Organismal Systems	Nervous system	hsa04720	Long-term potentiation	67/9434	0.0746269	23.4677	10.4238	1.92867e-06	2.78235e-06	3.8274e-07	5	NRAS/MAPK1/MAPK3/MAP2K1/RAF1
Organismal Systems	Endocrine system	hsa04920	Adipocytokine signaling pathway	70/9434	0.0714286	22.4619	10.1793	2.40101e-06	3.43559e-06	4.726e-07	5	MAPK8/PTPN11/STAT3/NFKB1/AKT3
Human Diseases	Infectious disease: parasitic	hsa05140	Leishmaniasis	79/9434	0.0632911	19.903	9.52907	4.38274e-06	6.22066e-06	8.55713e-07	5	MAPK1/MAPK3/JUN/NFKB1/STAT1
Human Diseases	Neurodegenerative disease	hsa05017	Spinocerebellar ataxia	144/9434	0.0416667	13.1028	8.26585	5.00218e-06	7.04307e-06	9.68843e-07	6	PIK3CB/PIK3R2/MAPK8/PIK3CD/PIK3R3/AKT3
Organismal Systems	Immune system	hsa04657	IL-17 signaling pathway	95/9434	0.0526316	16.5509	8.60391	1.08748e-05	1.51901e-05	2.08955e-06	5	MAPK1/MAPK3/JUN/MAPK8/NFKB1
Environmental Information Processing	Signal transduction	hsa04070	Phosphatidylinositol signaling system	98/9434	0.0510204	16.0442	8.45535	1.26616e-05	1.75467e-05	2.41373e-06	5	PIK3CB/PIK3R2/PLCG1/PIK3CD/PIK3R3
Environmental Information Processing	Signal transduction	hsa04310	Wnt signaling pathway	174/9434	0.0344828	10.8437	7.40211	1.4846e-05	2.04133e-05	2.80804e-06	6	JUN/MAPK8/MYC/RAC1/CTNNB1/RHOA
Human Diseases	Infectious disease: parasitic	hsa05146	Amoebiasis	103/9434	0.0485437	15.2654	8.2218	1.61416e-05	2.20226e-05	3.02943e-06	5	PIK3CB/PIK3R2/PIK3CD/PIK3R3/NFKB1
Organismal Systems	Nervous system	hsa04726	Serotonergic synapse	115/9434	0.0434783	13.6725	7.72244	2.7556e-05	3.70218e-05	5.09271e-06	5	NRAS/MAPK1/MAPK3/MAP2K1/RAF1
Organismal Systems	Endocrine system	hsa04928	Parathyroid hormone synthesis, secretion and action	115/9434	0.0434783	13.6725	7.72244	2.7556e-05	3.70218e-05	5.09271e-06	5	MAPK1/MAPK3/MAP2K1/RAF1/RHOA
Environmental Information Processing	Signal transduction	hsa04152	AMPK signaling pathway	122/9434	0.0409836	12.888	7.46441	3.66443e-05	4.8859e-05	6.72104e-06	5	PIK3CB/PIK3R2/PIK3CD/PIK3R3/AKT3
Human Diseases	Immune disease	hsa05321	Inflammatory bowel disease	66/9434	0.0606061	19.0586	8.31499	5.22218e-05	6.91056e-05	9.50615e-06	4	JUN/STAT3/NFKB1/STAT1
Organismal Systems	Circulatory system	hsa04270	Vascular smooth muscle contraction	134/9434	0.0373134	11.7338	7.06797	5.74689e-05	7.54815e-05	1.03832e-05	5	MAPK1/MAPK3/MAP2K1/RAF1/RHOA
Metabolism	Carbohydrate metabolism	hsa00562	Inositol phosphate metabolism	73/9434	0.0547945	17.2311	7.86278	7.76562e-05	0.000101241	1.39266e-05	4	PIK3CB/PLCG1/PIK3CG/PIK3CD
Cellular Processes	Transport and catabolism	hsa04148	Efferocytosis	157/9434	0.0318471	10.0149	6.43331	0.000121923	0.000157783	2.17045e-05	5	MAPK1/MAPK3/MAP2K1/PTPN11/RAC1
Cellular Processes	Cell growth and death	hsa04217	Necroptosis	159/9434	0.0314465	9.88889	6.38437	0.000129419	0.000166261	2.28709e-05	5	MAPK8/STAT3/STAT5B/STAT5A/STAT1
Cellular Processes	Cellular community - eukaryotes	hsa04530	Tight junction	170/9434	0.0294118	9.24902	6.12995	0.000177195	0.000225987	3.10868e-05	5	SRC/JUN/MAPK8/RAC1/RHOA
Cellular Processes	Transport and catabolism	hsa04137	Mitophagy - animal	105/9434	0.0380952	11.9797	6.38993	0.0003178	0.000402394	5.53533e-05	4	NRAS/SRC/JUN/MAPK8
Environmental Information Processing	Signal transduction	hsa04350	TGF-beta signaling pathway	110/9434	0.0363636	11.4352	6.21761	0.000379603	0.000477215	6.56456e-05	4	MAPK1/MAPK3/MYC/RHOA
Human Diseases	Endocrine and metabolic disease	hsa04936	Alcoholic liver disease	144/9434	0.0277778	8.73519	5.28291	0.00104794	0.00130806	0.000179937	4	MAPK8/NFKB1/CTNNB1/AKT3
Organismal Systems	Circulatory system	hsa04261	Adrenergic signaling in cardiomyocytes	154/9434	0.025974	8.16797	5.06537	0.00134457	0.00166651	0.000229245	4	MAPK1/MAPK3/PIK3CG/AKT3
Human Diseases	Endocrine and metabolic disease	hsa04934	Cushing syndrome	155/9434	0.0258065	8.11527	5.04471	0.00137715	0.00169496	0.000233158	4	MAPK1/MAPK3/MAP2K1/CTNNB1
Cellular Processes	Cell growth and death	hsa04114	Oocyte meiosis	139/9434	0.0215827	6.78705	3.88212	0.00950128	0.0116127	0.00159744	3	MAPK1/MAPK3/MAP2K1
Human Diseases	Substance dependence	hsa05030	Cocaine addiction	49/9434	0.0408163	12.8354	4.69129	0.0104786	0.0127189	0.0017496	2	JUN/NFKB1
Organismal Systems	Nervous system	hsa04723	Retrograde endocannabinoid signaling	149/9434	0.0201342	6.33154	3.70497	0.0114732	0.0138307	0.00190255	3	MAPK1/MAPK3/MAPK8
Human Diseases	Cardiovascular disease	hsa05416	Viral myocarditis	70/9434	0.0285714	8.98476	3.78712	0.0206502	0.0247241	0.00340104	2	RAC1/FYN
Organismal Systems	Immune system	hsa04622	RIG-I-like receptor signaling pathway	72/9434	0.0277778	8.73519	3.72119	0.0217705	0.0258892	0.00356132	2	MAPK8/NFKB1
Organismal Systems	Environmental adaptation	hsa04713	Circadian entrainment	97/9434	0.0206186	6.48385	3.06617	0.0377678	0.0443364	0.00609891	2	MAPK1/MAPK3
Organismal Systems	Environmental adaptation	hsa04714	Thermogenesis	235/9434	0.012766	4.01447	2.64304	0.0377867	0.0443364	0.00609891	3	GRB2/NRAS/SOS1
HNSC
Category	Subcategory	ID	Description	BgRatio	RichFactor	FoldEnrichment	zScore	pvalue	p.adjust	qvalue	Count	Gene_symbol
Human Diseases	Drug resistance: antineoplastic	hsa01521	EGFR tyrosine kinase inhibitor resistance	80/9434	0.2625	79.8847	40.6829	7.49217e-38	1.35608e-35	2.05049e-36	21	KRAS/MAPK3/AKT1/NRAS/SOS1/BRAF/EGFR/MAP2K1/SHC1/RAF1/JAK2/SRC/PIK3R2/PIK3CB/PIK3CD/STAT3/GRB2/PIK3R3/AKT3/PRKCA/JAK1
Environmental Information Processing	Signal transduction	hsa04012	ErbB signaling pathway	86/9434	0.244186	74.3113	39.2133	4.23852e-37	3.83586e-35	5.80008e-36	21	KRAS/MAPK3/AKT1/NRAS/SOS1/BRAF/EGFR/MAP2K1/SHC1/RAF1/SRC/PIK3R2/PIK3CB/PIK3CD/JUN/GRB2/CDKN1A/PIK3R3/AKT3/PRKCA/CDKN1B
Human Diseases	Infectious disease: viral	hsa05161	Hepatitis B	163/9434	0.141104	42.9412	31.013	4.10801e-35	2.4785e-33	3.74765e-34	23	KRAS/MAPK3/AKT1/NRAS/SOS1/BRAF/MAP2K1/RAF1/JAK2/SRC/PIK3R2/PIK3CB/PIK3CD/JUN/STAT3/GRB2/MAP3K1/CDKN1A/NFKB1/PIK3R3/AKT3/PRKCA/JAK1
Human Diseases	Cancer: specific types	hsa05220	Chronic myeloid leukemia	77/9434	0.246753	75.0926	37.4821	2.50257e-33	9.57859e-32	1.44835e-32	19	KRAS/MAPK3/AKT1/NRAS/SOS1/BRAF/MAP2K1/SHC1/RAF1/PIK3R2/PIK3CB/PIK3CD/GRB2/PTPN11/CDKN1A/NFKB1/PIK3R3/AKT3/CDKN1B
Human Diseases	Drug resistance: antineoplastic	hsa01522	Endocrine resistance	99/9434	0.20202	61.4793	34.7328	2.64602e-33	9.57859e-32	1.44835e-32	20	KRAS/MAPK3/AKT1/NRAS/SOS1/BRAF/EGFR/MAP2K1/SHC1/RAF1/SRC/PIK3R2/PIK3CB/PIK3CD/JUN/GRB2/CDKN1A/PIK3R3/AKT3/CDKN1B
Human Diseases	Cancer: overview	hsa05205	Proteoglycans in cancer	204/9434	0.112745	34.3109	27.6168	9.72567e-33	2.93391e-31	4.43627e-32	23	KRAS/MAPK3/AKT1/NRAS/SOS1/BRAF/EGFR/MAP2K1/RAF1/SRC/PIK3R2/PIK3CB/PIK3CD/STAT3/GRB2/CTNNB1/PTPN11/CDKN1A/PIK3R3/AKT3/PRKCA/SMAD2/FGFR1
Human Diseases	Cancer: specific types	hsa05215	Prostate cancer	106/9434	0.188679	57.4194	33.5397	1.1907e-32	3.07882e-31	4.65538e-32	20	KRAS/MAPK3/AKT1/NRAS/SOS1/BRAF/EGFR/MAP2K1/RAF1/PIK3R2/PIK3CB/PIK3CD/GRB2/CTNNB1/CDKN1A/NFKB1/PIK3R3/AKT3/FGFR1/CDKN1B
Human Diseases	Cancer: specific types	hsa05210	Colorectal cancer	87/9434	0.218391	66.4613	35.2193	3.40181e-32	7.6966e-31	1.16378e-31	19	KRAS/MAPK3/AKT1/NRAS/SOS1/BRAF/EGFR/MAP2K1/RAF1/PIK3R2/PIK3CB/PIK3CD/JUN/GRB2/CTNNB1/CDKN1A/PIK3R3/AKT3/SMAD2
Organismal Systems	Endocrine system	hsa04917	Prolactin signaling pathway	71/9434	0.253521	77.1522	36.9808	1.11035e-31	2.23303e-30	3.3765e-31	18	KRAS/MAPK3/AKT1/NRAS/SOS1/MAP2K1/SHC1/RAF1/JAK2/SRC/PIK3R2/PIK3CB/PIK3CD/STAT3/GRB2/NFKB1/PIK3R3/AKT3
Human Diseases	Cancer: specific types	hsa05223	Non-small cell lung cancer	73/9434	0.246575	75.0384	36.4611	1.95982e-31	3.54727e-30	5.36371e-31	18	KRAS/MAPK3/AKT1/NRAS/SOS1/BRAF/EGFR/MAP2K1/RAF1/PIK3R2/PIK3CB/PIK3CD/STAT3/GRB2/CDKN1A/PIK3R3/AKT3/PRKCA
Human Diseases	Cancer: specific types	hsa05214	Glioma	76/9434	0.236842	72.0764	35.7201	4.44751e-31	7.31817e-30	1.10656e-30	18	KRAS/MAPK3/AKT1/NRAS/SOS1/BRAF/EGFR/MAP2K1/SHC1/RAF1/PIK3R2/PIK3CB/PIK3CD/GRB2/CDKN1A/PIK3R3/AKT3/PRKCA
Human Diseases	Cancer: specific types	hsa05213	Endometrial cancer	59/9434	0.288136	87.6862	38.3498	6.73977e-31	1.01658e-29	1.53714e-30	17	KRAS/MAPK3/AKT1/NRAS/SOS1/BRAF/EGFR/MAP2K1/RAF1/PIK3R2/PIK3CB/PIK3CD/GRB2/CTNNB1/CDKN1A/PIK3R3/AKT3
Organismal Systems	Endocrine system	hsa04926	Relaxin signaling pathway	130/9434	0.153846	46.8189	30.2032	9.97404e-31	1.38869e-29	2.0998e-30	20	KRAS/MAPK3/AKT1/NRAS/SOS1/EGFR/MAP2K1/SHC1/RAF1/SRC/PIK3R2/PIK3CB/PIK3CD/JUN/GRB2/NFKB1/PIK3R3/AKT3/PRKCA/SMAD2
Human Diseases	Cancer: overview	hsa05235	PD-L1 expression and PD-1 checkpoint pathway in cancer	90/9434	0.2	60.8645	32.764	1.32067e-29	1.70744e-28	2.58176e-29	18	KRAS/MAPK3/AKT1/NRAS/EGFR/MAP2K1/RAF1/JAK2/PIK3R2/PIK3CB/PIK3CD/JUN/STAT3/PTPN11/NFKB1/PIK3R3/AKT3/JAK1
Human Diseases	Cancer: specific types	hsa05224	Breast cancer	148/9434	0.135135	41.1247	28.2488	1.59127e-29	1.92013e-28	2.90337e-29	20	KRAS/MAPK3/AKT1/NRAS/SOS1/BRAF/EGFR/MAP2K1/SHC1/RAF1/PIK3R2/PIK3CB/PIK3CD/JUN/GRB2/CTNNB1/CDKN1A/PIK3R3/AKT3/FGFR1
Human Diseases	Cancer: specific types	hsa05211	Renal cell carcinoma	70/9434	0.242857	73.9069	35.1528	1.88381e-29	2.13106e-28	3.22231e-29	17	KRAS/MAPK3/AKT1/NRAS/SOS1/BRAF/MAP2K1/RAF1/PIK3R2/PIK3CB/PIK3CD/JUN/GRB2/PTPN11/CDKN1A/PIK3R3/AKT3
Human Diseases	Cancer: specific types	hsa05226	Gastric cancer	150/9434	0.133333	40.5763	28.0535	2.11597e-29	2.25288e-28	3.40651e-29	20	KRAS/MAPK3/AKT1/NRAS/SOS1/BRAF/EGFR/MAP2K1/SHC1/RAF1/PIK3R2/PIK3CB/PIK3CD/GRB2/CTNNB1/CDKN1A/PIK3R3/AKT3/SMAD2/CDKN1B
Organismal Systems	Nervous system	hsa04722	Neurotrophin signaling pathway	120/9434	0.158333	48.1844	29.8671	2.7284e-29	2.74356e-28	4.14845e-29	19	KRAS/MAPK3/AKT1/NRAS/SOS1/BRAF/MAP2K1/SHC1/RAF1/PIK3R2/PIK3CB/PIK3CD/JUN/GRB2/PTPN11/MAP3K1/NFKB1/PIK3R3/AKT3
Human Diseases	Infectious disease: viral	hsa05160	Hepatitis C	159/9434	0.125786	38.2796	27.2198	7.26528e-29	6.92114e-28	1.04652e-28	20	KRAS/MAPK3/AKT1/NRAS/SOS1/BRAF/EGFR/MAP2K1/RAF1/PIK3R2/PIK3CB/PIK3CD/STAT3/GRB2/CTNNB1/CDKN1A/NFKB1/PIK3R3/AKT3/JAK1
Human Diseases	Cancer: specific types	hsa05212	Pancreatic cancer	77/9434	0.220779	67.1881	33.4834	1.16146e-28	1.05112e-27	1.58936e-28	17	KRAS/MAPK3/AKT1/BRAF/EGFR/MAP2K1/RAF1/PIK3R2/PIK3CB/PIK3CD/STAT3/CDKN1A/NFKB1/PIK3R3/AKT3/SMAD2/JAK1
Human Diseases	Cancer: specific types	hsa05225	Hepatocellular carcinoma	170/9434	0.117647	35.8027	26.2912	2.97434e-28	2.5636e-27	3.87633e-28	20	KRAS/MAPK3/AKT1/NRAS/SOS1/BRAF/EGFR/MAP2K1/SHC1/RAF1/PIK3R2/PIK3CB/PIK3CD/GRB2/CTNNB1/CDKN1A/PIK3R3/AKT3/PRKCA/SMAD2
Human Diseases	Infectious disease: viral	hsa05163	Human cytomegalovirus infection	226/9434	0.0929204	28.2778	23.8316	1.30816e-27	1.07626e-26	1.62737e-27	21	KRAS/MAPK3/AKT1/NRAS/SOS1/EGFR/MAP2K1/RAF1/SRC/PIK3R2/PIK3CB/PIK3CD/STAT3/GRB2/CTNNB1/CDKN1A/NFKB1/PIK3R3/AKT3/PRKCA/JAK1
Human Diseases	Cancer: specific types	hsa05221	Acute myeloid leukemia	68/9434	0.235294	71.6053	33.5496	2.19859e-27	1.7302e-26	2.61618e-27	16	KRAS/MAPK3/AKT1/NRAS/SOS1/BRAF/MAP2K1/RAF1/PIK3R2/PIK3CB/PIK3CD/STAT3/GRB2/NFKB1/PIK3R3/AKT3
Organismal Systems	Endocrine system	hsa04935	Growth hormone synthesis, secretion and action	122/9434	0.147541	44.9001	28.0218	5.00325e-27	3.77329e-26	5.70547e-27	18	KRAS/MAPK3/AKT1/NRAS/SOS1/MAP2K1/SHC1/RAF1/JAK2/PIK3R2/PIK3CB/PIK3CD/STAT3/GRB2/MAP3K1/PIK3R3/AKT3/PRKCA
Environmental Information Processing	Signal transduction	hsa04068	FoxO signaling pathway	133/9434	0.135338	41.1865	26.7987	2.61481e-26	1.89312e-25	2.86253e-26	18	KRAS/MAPK3/AKT1/NRAS/SOS1/BRAF/EGFR/MAP2K1/RAF1/PIK3R2/PIK3CB/PIK3CD/STAT3/GRB2/CDKN1A/PIK3R3/AKT3/CDKN1B
Human Diseases	Cancer: overview	hsa05207	Chemical carcinogenesis - receptor activation	217/9434	0.0921659	28.0482	23.1444	4.82375e-26	3.35807e-25	5.07763e-26	20	KRAS/MAPK3/AKT1/NRAS/SOS1/EGFR/MAP2K1/RAF1/JAK2/SRC/PIK3R2/PIK3CB/PIK3CD/JUN/STAT3/GRB2/NFKB1/PIK3R3/AKT3/PRKCA
Cellular Processes	Cellular community - eukaryotes	hsa04550	Signaling pathways regulating pluripotency of stem cells	144/9434	0.125	38.0403	25.717	1.18586e-25	7.94965e-25	1.20204e-25	18	KRAS/MAPK3/AKT1/NRAS/MAP2K1/RAF1/JAK2/PIK3R2/PIK3CB/PIK3CD/STAT3/GRB2/CTNNB1/PIK3R3/AKT3/SMAD2/FGFR1/JAK1
Environmental Information Processing	Signal transduction	hsa04072	Phospholipase D signaling pathway	149/9434	0.120805	36.7638	25.2649	2.26372e-25	1.46333e-24	2.21266e-25	18	KRAS/MAPK3/AKT1/NRAS/SOS1/EGFR/MAP2K1/SHC1/RAF1/PIK3R2/PIK3CB/PIK3CD/GRB2/PTPN11/PIK3R3/AKT3/FYN/PRKCA
Organismal Systems	Immune system	hsa04062	Chemokine signaling pathway	193/9434	0.0984456	29.9592	23.3388	3.74787e-25	2.33919e-24	3.53701e-25	19	KRAS/MAPK3/AKT1/NRAS/SOS1/BRAF/MAP2K1/SHC1/RAF1/JAK2/SRC/PIK3R2/PIK3CB/PIK3CD/STAT3/GRB2/NFKB1/PIK3R3/AKT3
Organismal Systems	Immune system	hsa04664	Fc epsilon RI signaling pathway	69/9434	0.217391	66.1571	31.1892	4.95244e-25	2.96527e-24	4.48369e-25	15	KRAS/MAPK3/AKT1/NRAS/SOS1/MAP2K1/RAF1/PIK3R2/PIK3CB/PIK3CD/GRB2/PIK3R3/AKT3/FYN/PRKCA
Human Diseases	Infectious disease: viral	hsa05167	Kaposi sarcoma-associated herpesvirus infection	196/9434	0.0969388	29.5007	23.1508	5.07864e-25	2.96527e-24	4.48369e-25	19	KRAS/MAPK3/AKT1/NRAS/MAP2K1/RAF1/JAK2/SRC/PIK3R2/PIK3CB/PIK3CD/JUN/STAT3/CTNNB1/CDKN1A/NFKB1/PIK3R3/AKT3/JAK1
Organismal Systems	Immune system	hsa04660	T cell receptor signaling pathway	122/9434	0.139344	42.4056	26.4296	5.70346e-25	3.22602e-24	4.87796e-25	17	KRAS/MAPK3/AKT1/NRAS/SOS1/MAP2K1/RAF1/PIK3R2/PIK3CB/PIK3CD/JUN/GRB2/PTPN11/NFKB1/PIK3R3/AKT3/FYN
Cellular Processes	Cellular community - eukaryotes	hsa04510	Focal adhesion	203/9434	0.0935961	28.4834	22.7283	1.01272e-24	5.55464e-24	8.39899e-25	19	MAPK3/AKT1/SOS1/BRAF/EGFR/MAP2K1/SHC1/RAF1/SRC/PIK3R2/PIK3CB/PIK3CD/JUN/GRB2/CTNNB1/PIK3R3/AKT3/FYN/PRKCA
Human Diseases	Cancer: specific types	hsa05218	Melanoma	73/9434	0.205479	62.532	30.3022	1.26239e-24	6.72038e-24	1.01617e-24	15	KRAS/MAPK3/AKT1/NRAS/BRAF/EGFR/MAP2K1/RAF1/PIK3R2/PIK3CB/PIK3CD/CDKN1A/PIK3R3/AKT3/FGFR1
Human Diseases	Cancer: overview	hsa05231	Choline metabolism in cancer	99/9434	0.161616	49.1834	27.6714	1.61402e-24	8.34678e-24	1.26209e-24	16	KRAS/MAPK3/AKT1/NRAS/SOS1/EGFR/MAP2K1/RAF1/PIK3R2/PIK3CB/PIK3CD/JUN/GRB2/PIK3R3/AKT3/PRKCA
Human Diseases	Endocrine and metabolic disease	hsa04933	AGE-RAGE signaling pathway in diabetic complications	101/9434	0.158416	48.2095	27.3875	2.27624e-24	1.14444e-23	1.73048e-24	16	KRAS/MAPK3/AKT1/NRAS/JAK2/PIK3R2/PIK3CB/PIK3CD/JUN/STAT3/NFKB1/PIK3R3/AKT3/PRKCA/SMAD2/CDKN1B
Organismal Systems	Endocrine system	hsa04915	Estrogen signaling pathway	139/9434	0.122302	37.2193	24.6999	5.93662e-24	2.90413e-23	4.39124e-24	17	KRAS/MAPK3/AKT1/NRAS/SOS1/EGFR/MAP2K1/SHC1/RAF1/SRC/PIK3R2/PIK3CB/PIK3CD/JUN/GRB2/PIK3R3/AKT3
Human Diseases	Cancer: overview	hsa05208	Chemical carcinogenesis - reactive oxygen species	227/9434	0.0837004	25.4719	21.4286	9.03112e-24	4.30167e-23	6.50441e-24	19	KRAS/MAPK3/AKT1/NRAS/SOS1/BRAF/EGFR/MAP2K1/RAF1/SRC/PIK3R2/PIK3CB/PIK3CD/JUN/GRB2/PTPN11/NFKB1/PIK3R3/AKT3
Environmental Information Processing	Signal transduction	hsa04014	Ras signaling pathway	238/9434	0.0798319	24.2947	20.8986	2.27131e-23	1.05412e-22	1.5939e-23	19	KRAS/MAPK3/AKT1/NRAS/SOS1/EGFR/MAP2K1/SHC1/RAF1/PIK3R2/PIK3CB/PIK3CD/GRB2/PTPN11/NFKB1/PIK3R3/AKT3/PRKCA/FGFR1
Environmental Information Processing	Signal transduction	hsa04151	PI3K-Akt signaling pathway	362/9434	0.058011	17.6541	18.5522	3.24464e-23	1.4682e-22	2.22002e-23	21	KRAS/MAPK3/AKT1/NRAS/SOS1/EGFR/MAP2K1/RAF1/JAK2/PIK3R2/PIK3CB/PIK3CD/GRB2/CDKN1A/NFKB1/PIK3R3/AKT3/PRKCA/FGFR1/CDKN1B/JAK1
Organismal Systems	Immune system	hsa04662	B cell receptor signaling pathway	91/9434	0.164835	50.1631	27.0576	4.62446e-23	2.04153e-22	3.08693e-23	15	KRAS/MAPK3/AKT1/NRAS/SOS1/MAP2K1/RAF1/PIK3R2/PIK3CB/PIK3CD/JUN/GRB2/NFKB1/PIK3R3/AKT3
Organismal Systems	Immune system	hsa04650	Natural killer cell mediated cytotoxicity	134/9434	0.119403	36.337	23.6545	2.75307e-22	1.18644e-21	1.79398e-22	16	KRAS/MAPK3/NRAS/SOS1/BRAF/MAP2K1/SHC1/RAF1/PIK3R2/PIK3CB/PIK3CD/GRB2/PTPN11/PIK3R3/FYN/PRKCA
Environmental Information Processing	Signal transduction	hsa04370	VEGF signaling pathway	60/9434	0.216667	65.9366	28.9718	1.3126e-21	5.52513e-21	8.35437e-22	13	KRAS/MAPK3/AKT1/NRAS/MAP2K1/RAF1/SRC/PIK3R2/PIK3CB/PIK3CD/PIK3R3/AKT3/PRKCA
Environmental Information Processing	Signal transduction	hsa04015	Rap1 signaling pathway	212/9434	0.0801887	24.4032	19.7881	1.00334e-20	4.12736e-20	6.24084e-21	17	KRAS/MAPK3/AKT1/NRAS/BRAF/EGFR/MAP2K1/RAF1/SRC/PIK3R2/PIK3CB/PIK3CD/CTNNB1/PIK3R3/AKT3/PRKCA/FGFR1
Human Diseases	Cancer: overview	hsa05230	Central carbon metabolism in cancer	71/9434	0.183099	55.721	26.5735	1.44742e-20	5.81478e-20	8.79234e-21	13	KRAS/MAPK3/AKT1/NRAS/EGFR/MAP2K1/RAF1/PIK3R2/PIK3CB/PIK3CD/PIK3R3/AKT3/FGFR1
Human Diseases	Infectious disease: viral	hsa05165	Human papillomavirus infection	333/9434	0.0570571	17.3638	17.4555	1.47779e-20	5.81478e-20	8.79234e-21	19	KRAS/MAPK3/AKT1/NRAS/SOS1/EGFR/MAP2K1/RAF1/PIK3R2/PIK3CB/PIK3CD/GRB2/CTNNB1/CDKN1A/NFKB1/PIK3R3/AKT3/CDKN1B/JAK1
Organismal Systems	Endocrine system	hsa04910	Insulin signaling pathway	138/9434	0.108696	33.0785	21.7961	3.40562e-20	1.31152e-19	1.98311e-20	15	KRAS/MAPK3/AKT1/NRAS/SOS1/BRAF/MAP2K1/SHC1/RAF1/PIK3R2/PIK3CB/PIK3CD/GRB2/PIK3R3/AKT3
Organismal Systems	Immune system	hsa04625	C-type lectin receptor signaling pathway	105/9434	0.133333	40.5763	23.4145	4.15051e-20	1.56509e-19	2.36652e-20	14	KRAS/MAPK3/AKT1/NRAS/RAF1/SRC/PIK3R2/PIK3CB/PIK3CD/JUN/PTPN11/NFKB1/PIK3R3/AKT3
Environmental Information Processing	Signal transduction	hsa04066	HIF-1 signaling pathway	110/9434	0.127273	38.732	22.8548	8.2404e-20	3.0439e-19	4.60258e-20	14	MAPK3/AKT1/EGFR/MAP2K1/PIK3R2/PIK3CB/PIK3CD/STAT3/CDKN1A/NFKB1/PIK3R3/AKT3/PRKCA/CDKN1B
Environmental Information Processing	Signal transduction	hsa04150	mTOR signaling pathway	158/9434	0.0949367	28.8914	20.2998	2.78382e-19	1.00774e-18	1.52378e-19	15	KRAS/MAPK3/AKT1/NRAS/SOS1/BRAF/MAP2K1/RAF1/PIK3R2/PIK3CB/PIK3CD/GRB2/PIK3R3/AKT3/PRKCA
Human Diseases	Cancer: overview	hsa05206	MicroRNAs in cancer	319/9434	0.0564263	17.1718	16.8713	2.87941e-19	1.02191e-18	1.54519e-19	18	KRAS/MAPK3/NRAS/SOS1/EGFR/MAP2K1/SHC1/RAF1/PIK3R2/PIK3CB/PIK3CD/STAT3/GRB2/CDKN1A/NFKB1/PIK3R3/PRKCA/CDKN1B
Environmental Information Processing	Signal transduction	hsa04071	Sphingolipid signaling pathway	122/9434	0.114754	34.9223	21.6529	3.75814e-19	1.28344e-18	1.94065e-19	14	KRAS/MAPK3/AKT1/NRAS/MAP2K1/RAF1/PIK3R2/PIK3CB/PIK3CD/NFKB1/PIK3R3/AKT3/FYN/PRKCA
Organismal Systems	Endocrine system	hsa04919	Thyroid hormone signaling pathway	122/9434	0.114754	34.9223	21.6529	3.75814e-19	1.28344e-18	1.94065e-19	14	KRAS/MAPK3/AKT1/NRAS/MAP2K1/RAF1/SRC/PIK3R2/PIK3CB/PIK3CD/CTNNB1/PIK3R3/AKT3/PRKCA
Organismal Systems	Endocrine system	hsa04929	GnRH secretion	65/9434	0.184615	56.1826	25.6321	4.99691e-19	1.67489e-18	2.53255e-19	12	KRAS/MAPK3/AKT1/NRAS/MAP2K1/RAF1/PIK3R2/PIK3CB/PIK3CD/PIK3R3/AKT3/PRKCA
Environmental Information Processing	Signal transduction	hsa04630	JAK-STAT signaling pathway	168/9434	0.0892857	27.1717	19.6523	7.17262e-19	2.36044e-18	3.56915e-19	15	AKT1/SOS1/EGFR/RAF1/JAK2/PIK3R2/PIK3CB/PIK3CD/STAT3/GRB2/PTPN11/CDKN1A/PIK3R3/AKT3/JAK1
Human Diseases	Infectious disease: viral	hsa05166	Human T-cell leukemia virus 1 infection	224/9434	0.0714286	21.7373	18.0351	1.30974e-18	4.23326e-18	6.40097e-19	16	KRAS/MAPK3/AKT1/NRAS/MAP2K1/PIK3R2/PIK3CB/PIK3CD/JUN/MAP3K1/CDKN1A/NFKB1/PIK3R3/AKT3/SMAD2/JAK1
Cellular Processes	Cell motility	hsa04810	Regulation of actin cytoskeleton	232/9434	0.0689655	20.9878	17.6986	2.31266e-18	7.3437e-18	1.11042e-18	16	KRAS/MAPK3/AKT1/NRAS/SOS1/BRAF/EGFR/MAP2K1/RAF1/SRC/PIK3R2/PIK3CB/PIK3CD/PIK3R3/AKT3/FGFR1
Organismal Systems	Nervous system	hsa04725	Cholinergic synapse	116/9434	0.112069	34.1051	20.5985	1.26469e-17	3.94669e-17	5.96767e-18	13	KRAS/MAPK3/AKT1/NRAS/MAP2K1/JAK2/PIK3R2/PIK3CB/PIK3CD/PIK3R3/AKT3/FYN/PRKCA
Cellular Processes	Cell growth and death	hsa04218	Cellular senescence	157/9434	0.089172	27.137	18.9616	1.44524e-17	4.43369e-17	6.70405e-18	14	KRAS/MAPK3/AKT1/NRAS/MAP2K1/RAF1/PIK3R2/PIK3CB/PIK3CD/CDKN1A/NFKB1/PIK3R3/AKT3/SMAD2
Human Diseases	Cancer: overview	hsa05203	Viral carcinogenesis	205/9434	0.0731707	22.2675	17.6762	1.50673e-17	4.54531e-17	6.87282e-18	15	KRAS/MAPK3/NRAS/SRC/PIK3R2/PIK3CB/PIK3CD/JUN/STAT3/GRB2/CDKN1A/NFKB1/PIK3R3/CDKN1B/JAK1
Human Diseases	Cardiovascular disease	hsa05417	Lipid and atherosclerosis	216/9434	0.0694444	21.1335	17.187	3.33163e-17	9.88565e-17	1.49478e-17	15	KRAS/MAPK3/AKT1/NRAS/JAK2/SRC/PIK3R2/PIK3CB/PIK3CD/JUN/STAT3/NFKB1/PIK3R3/AKT3/PRKCA
Organismal Systems	Endocrine system	hsa04912	GnRH signaling pathway	93/9434	0.129032	39.2674	21.2935	4.9039e-17	1.43162e-16	2.16471e-17	12	KRAS/MAPK3/NRAS/SOS1/EGFR/MAP2K1/RAF1/SRC/JUN/GRB2/MAP3K1/PRKCA
Cellular Processes	Cell growth and death	hsa04210	Apoptosis	137/9434	0.0948905	28.8773	18.8718	1.18307e-16	3.39897e-16	5.13946e-17	13	KRAS/MAPK3/AKT1/NRAS/MAP2K1/RAF1/PIK3R2/PIK3CB/PIK3CD/JUN/NFKB1/PIK3R3/AKT3
Environmental Information Processing	Signal transduction	hsa04010	MAPK signaling pathway	300/9434	0.0533333	16.2305	15.3928	1.43843e-16	4.06806e-16	6.15118e-17	16	KRAS/MAPK3/AKT1/NRAS/SOS1/BRAF/EGFR/MAP2K1/RAF1/JUN/GRB2/MAP3K1/NFKB1/AKT3/PRKCA/FGFR1
Organismal Systems	Development and regeneration	hsa04380	Osteoclast differentiation	143/9434	0.0909091	27.6657	18.4485	2.09588e-16	5.83622e-16	8.82476e-17	13	MAPK3/AKT1/MAP2K1/PIK3R2/PIK3CB/PIK3CD/JUN/GRB2/NFKB1/PIK3R3/AKT3/FYN/JAK1
Human Diseases	Infectious disease: viral	hsa05170	Human immunodeficiency virus 1 infection	213/9434	0.0657277	20.0024	16.1058	1.10327e-15	3.02563e-15	4.57496e-16	14	KRAS/MAPK3/AKT1/NRAS/MAP2K1/RAF1/PIK3R2/PIK3CB/PIK3CD/JUN/NFKB1/PIK3R3/AKT3/PRKCA
Human Diseases	Infectious disease: viral	hsa05164	Influenza A	173/9434	0.0751445	22.8682	16.6678	2.60953e-15	7.04963e-15	1.06595e-15	13	MAPK3/AKT1/MAP2K1/RAF1/JAK2/PIK3R2/PIK3CB/PIK3CD/NFKB1/PIK3R3/AKT3/PRKCA/JAK1
Human Diseases	Cancer: specific types	hsa05219	Bladder cancer	41/9434	0.219512	66.8025	24.244	4.06335e-15	1.08157e-14	1.6354e-15	9	KRAS/MAPK3/NRAS/BRAF/EGFR/MAP2K1/RAF1/SRC/CDKN1A
Organismal Systems	Immune system	hsa04620	Toll-like receptor signaling pathway	109/9434	0.100917	30.7115	17.9137	2.04432e-14	5.36264e-14	8.10867e-15	11	MAPK3/AKT1/MAP2K1/PIK3R2/PIK3CB/PIK3CD/JUN/NFKB1/PIK3R3/AKT3/JAK1
Organismal Systems	Endocrine system	hsa04914	Progesterone-mediated oocyte maturation	111/9434	0.0990991	30.1581	17.7425	2.51145e-14	6.49388e-14	9.81919e-15	11	KRAS/MAPK3/AKT1/BRAF/MAP2K1/RAF1/PIK3R2/PIK3CB/PIK3CD/PIK3R3/AKT3
Cellular Processes	Cellular community - eukaryotes	hsa04540	Gap junction	92/9434	0.108696	33.0785	17.7526	1.76732e-13	4.50543e-13	6.81251e-14	10	KRAS/MAPK3/NRAS/SOS1/EGFR/MAP2K1/RAF1/SRC/GRB2/PRKCA
Organismal Systems	Development and regeneration	hsa04360	Axon guidance	184/9434	0.0652174	19.8471	14.8237	2.16141e-13	5.43355e-13	8.2159e-14	12	KRAS/MAPK3/NRAS/RAF1/SRC/PIK3R2/PIK3CB/PIK3CD/PTPN11/PIK3R3/FYN/PRKCA
Human Diseases	Infectious disease: bacterial	hsa05135	Yersinia infection	138/9434	0.0797101	24.2576	15.8026	2.895e-13	7.17802e-13	1.08536e-13	11	MAPK3/AKT1/MAP2K1/SRC/PIK3R2/PIK3CB/PIK3CD/JUN/NFKB1/PIK3R3/AKT3
Human Diseases	Infectious disease: viral	hsa05162	Measles	139/9434	0.0791367	24.0831	15.7416	3.13761e-13	7.67442e-13	1.16042e-13	11	AKT1/PIK3R2/PIK3CB/PIK3CD/JUN/STAT3/NFKB1/PIK3R3/AKT3/CDKN1B/JAK1
Organismal Systems	Immune system	hsa04666	Fc gamma R-mediated phagocytosis	99/9434	0.10101	30.7397	17.0793	3.76427e-13	9.08444e-13	1.37363e-13	10	MAPK3/AKT1/MAP2K1/RAF1/PIK3R2/PIK3CB/PIK3CD/PIK3R3/AKT3/PRKCA
Organismal Systems	Immune system	hsa04613	Neutrophil extracellular trap formation	196/9434	0.0612245	18.632	14.3223	4.61398e-13	1.09885e-12	1.66154e-13	12	MAPK3/AKT1/MAP2K1/RAF1/SRC/PIK3R2/PIK3CB/PIK3CD/NFKB1/PIK3R3/AKT3/PRKCA
Human Diseases	Infectious disease: parasitic	hsa05142	Chagas disease	103/9434	0.0970874	29.5459	16.7252	5.65375e-13	1.329e-12	2.00953e-13	10	MAPK3/AKT1/PIK3R2/PIK3CB/PIK3CD/JUN/NFKB1/PIK3R3/AKT3/SMAD2
Human Diseases	Infectious disease: viral	hsa05169	Epstein-Barr virus infection	204/9434	0.0588235	17.9013	14.0122	7.44644e-13	1.72796e-12	2.61279e-13	12	AKT1/PIK3R2/PIK3CB/PIK3CD/JUN/STAT3/CDKN1A/NFKB1/PIK3R3/AKT3/CDKN1B/JAK1
Environmental Information Processing	Signal transduction	hsa04668	TNF signaling pathway	119/9434	0.0840336	25.5733	15.4888	2.46777e-12	5.654e-12	8.54923e-13	10	MAPK3/AKT1/MAP2K1/PIK3R2/PIK3CB/PIK3CD/JUN/NFKB1/PIK3R3/AKT3
Environmental Information Processing	Signal transduction	hsa04024	cAMP signaling pathway	226/9434	0.0530973	16.1587	13.2436	2.52205e-12	5.70614e-12	8.62807e-13	12	MAPK3/AKT1/BRAF/MAP2K1/RAF1/PIK3R2/PIK3CB/PIK3CD/JUN/NFKB1/PIK3R3/AKT3
Cellular Processes	Transport and catabolism	hsa04140	Autophagy - animal	169/9434	0.0650888	19.808	14.1656	2.73206e-12	6.10497e-12	9.23112e-13	11	KRAS/MAPK3/AKT1/NRAS/MAP2K1/RAF1/PIK3R2/PIK3CB/PIK3CD/PIK3R3/AKT3
Human Diseases	Neurodegenerative disease	hsa05010	Alzheimer disease	391/9434	0.0358056	10.8965	11.4758	4.8902e-12	1.07942e-11	1.63216e-12	14	KRAS/MAPK3/AKT1/NRAS/BRAF/MAP2K1/RAF1/PIK3R2/PIK3CB/PIK3CD/CTNNB1/NFKB1/PIK3R3/AKT3
Human Diseases	Infectious disease: viral	hsa05168	Herpes simplex virus 1 infection	182/9434	0.0604396	18.3931	13.604	6.1644e-12	1.34428e-11	2.03265e-12	11	AKT1/JAK2/SRC/PIK3R2/PIK3CB/PIK3CD/PTPN11/NFKB1/PIK3R3/AKT3/JAK1
Organismal Systems	Aging	hsa04211	Longevity regulating pathway	90/9434	0.1	30.4323	16.1083	7.38598e-12	1.5915e-11	2.40646e-12	9	KRAS/AKT1/NRAS/PIK3R2/PIK3CB/PIK3CD/NFKB1/PIK3R3/AKT3
Human Diseases	Cancer: specific types	hsa05222	Small cell lung cancer	93/9434	0.0967742	29.4506	15.831	9.99522e-12	2.12839e-11	3.21827e-12	9	AKT1/PIK3R2/PIK3CB/PIK3CD/CDKN1A/NFKB1/PIK3R3/AKT3/CDKN1B
Human Diseases	Cardiovascular disease	hsa05418	Fluid shear stress and atherosclerosis	142/9434	0.0704225	21.4312	14.0849	1.46975e-11	3.09332e-11	4.6773e-12	10	AKT1/SRC/PIK3R2/PIK3CB/PIK3CD/JUN/CTNNB1/NFKB1/PIK3R3/AKT3
Organismal Systems	Aging	hsa04213	Longevity regulating pathway - multiple species	62/9434	0.129032	39.2674	17.3573	1.5286e-11	3.18019e-11	4.80867e-12	8	KRAS/AKT1/NRAS/PIK3R2/PIK3CB/PIK3CD/PIK3R3/AKT3
Human Diseases	Cancer: specific types	hsa05216	Thyroid cancer	37/9434	0.189189	57.5745	19.797	1.92299e-11	3.95524e-11	5.9806e-12	7	KRAS/MAPK3/NRAS/BRAF/MAP2K1/CTNNB1/CDKN1A
Organismal Systems	Excretory system	hsa04960	Aldosterone-regulated sodium reabsorption	38/9434	0.184211	56.0594	19.5265	2.35196e-11	4.78319e-11	7.23251e-12	7	KRAS/MAPK3/PIK3R2/PIK3CB/PIK3CD/PIK3R3/PRKCA
Organismal Systems	Endocrine system	hsa04921	Oxytocin signaling pathway	155/9434	0.0645161	19.6337	13.4303	3.53315e-11	7.10557e-11	1.07441e-11	10	KRAS/MAPK3/NRAS/EGFR/MAP2K1/RAF1/SRC/JUN/CDKN1A/PRKCA
Human Diseases	Endocrine and metabolic disease	hsa04931	Insulin resistance	109/9434	0.0825688	25.1276	14.547	4.28288e-11	8.51869e-11	1.28808e-11	9	AKT1/PIK3R2/PIK3CB/PIK3CD/STAT3/PTPN11/NFKB1/PIK3R3/AKT3
Human Diseases	Drug resistance: antineoplastic	hsa01524	Platinum drug resistance	75/9434	0.106667	32.4611	15.7059	7.41429e-11	1.45868e-10	2.20563e-11	8	MAPK3/AKT1/PIK3R2/PIK3CB/PIK3CD/CDKN1A/PIK3R3/AKT3
Human Diseases	Infectious disease: viral	hsa05171	Coronavirus disease - COVID-19	238/9434	0.0462185	14.0653	11.7215	1.13568e-10	2.21031e-10	3.34214e-11	11	MAPK3/EGFR/PIK3R2/PIK3CB/PIK3CD/JUN/STAT3/NFKB1/PIK3R3/PRKCA/JAK1
Organismal Systems	Immune system	hsa04611	Platelet activation	126/9434	0.0714286	21.7373	13.455	1.5956e-10	3.07238e-10	4.64565e-11	9	MAPK3/AKT1/SRC/PIK3R2/PIK3CB/PIK3CD/PIK3R3/AKT3/FYN
Human Diseases	Infectious disease: bacterial	hsa05131	Shigellosis	253/9434	0.0434783	13.2314	11.3231	2.18989e-10	4.17232e-10	6.30882e-11	11	MAPK3/AKT1/EGFR/SRC/PIK3R2/PIK3CB/PIK3CD/JUN/NFKB1/PIK3R3/AKT3
Organismal Systems	Nervous system	hsa04730	Long-term depression	60/9434	0.116667	35.5043	15.3943	6.85207e-10	1.2919e-09	1.95344e-10	7	KRAS/MAPK3/NRAS/BRAF/MAP2K1/RAF1/PRKCA
Organismal Systems	Nervous system	hsa04720	Long-term potentiation	67/9434	0.104478	31.7949	14.5241	1.51895e-09	2.83433e-09	4.28569e-10	7	KRAS/MAPK3/NRAS/BRAF/MAP2K1/RAF1/PRKCA
Organismal Systems	Endocrine system	hsa04928	Parathyroid hormone synthesis, secretion and action	115/9434	0.0695652	21.1703	12.4954	2.38194e-09	4.39929e-09	6.65203e-10	8	MAPK3/BRAF/EGFR/MAP2K1/RAF1/CDKN1A/PRKCA/FGFR1
Human Diseases	Infectious disease: bacterial	hsa05132	Salmonella infection	251/9434	0.0398406	12.1244	10.2564	4.03275e-09	7.37302e-09	1.11485e-09	10	MAPK3/AKT1/MAP2K1/RAF1/PIK3CB/PIK3CD/JUN/CTNNB1/NFKB1/AKT3
Human Diseases	Infectious disease: bacterial	hsa05100	Bacterial invasion of epithelial cells	78/9434	0.0897436	27.311	13.3971	4.50217e-09	8.14893e-09	1.23217e-09	7	SHC1/SRC/PIK3R2/PIK3CB/PIK3CD/CTNNB1/PIK3R3
Human Diseases	Substance dependence	hsa05034	Alcoholism	191/9434	0.0471204	14.3398	10.6938	6.49728e-09	1.16436e-08	1.7606e-09	9	KRAS/MAPK3/NRAS/SOS1/BRAF/MAP2K1/SHC1/RAF1/GRB2
Environmental Information Processing	Signal transduction	hsa04371	Apelin signaling pathway	140/9434	0.0571429	17.3899	11.2179	1.13834e-08	2.01999e-08	3.05437e-09	8	KRAS/MAPK3/AKT1/NRAS/MAP2K1/RAF1/AKT3/SMAD2
Human Diseases	Cardiovascular disease	hsa05415	Diabetic cardiomyopathy	205/9434	0.0439024	13.3605	10.2733	1.20782e-08	2.12249e-08	3.20934e-09	9	AKT1/PIK3R2/PIK3CB/PIK3CD/NFKB1/PIK3R3/AKT3/PRKCA/SMAD2
Organismal Systems	Digestive system	hsa04973	Carbohydrate digestion and absorption	52/9434	0.115385	35.1141	14.1632	1.38081e-08	2.40314e-08	3.63371e-09	6	AKT1/PIK3R2/PIK3CB/PIK3CD/PIK3R3/AKT3
Organismal Systems	Endocrine system	hsa04916	Melanogenesis	101/9434	0.0693069	21.0917	11.6557	2.78382e-08	4.79037e-08	7.24337e-09	7	KRAS/MAPK3/NRAS/MAP2K1/RAF1/CTNNB1/PRKCA
Human Diseases	Endocrine and metabolic disease	hsa04932	Non-alcoholic fatty liver disease	157/9434	0.0509554	15.5069	10.5243	2.80541e-08	4.79037e-08	7.24337e-09	8	AKT1/PIK3R2/PIK3CB/PIK3CD/JUN/NFKB1/PIK3R3/AKT3
Organismal Systems	Endocrine system	hsa04923	Regulation of lipolysis in adipocytes	59/9434	0.101695	30.9481	13.249	3.00761e-08	5.08764e-08	7.69286e-09	6	AKT1/PIK3R2/PIK3CB/PIK3CD/PIK3R3/AKT3
Organismal Systems	Immune system	hsa04659	Th17 cell differentiation	109/9434	0.0642202	19.5437	11.1804	4.73696e-08	7.93879e-08	1.2004e-08	7	MAPK3/JAK2/JUN/STAT3/NFKB1/SMAD2/JAK1
Human Diseases	Infectious disease: parasitic	hsa05145	Toxoplasmosis	112/9434	0.0625	19.0202	11.015	5.72071e-08	9.49953e-08	1.43639e-08	7	MAPK3/AKT1/JAK2/STAT3/NFKB1/AKT3/JAK1
Organismal Systems	Nervous system	hsa04726	Serotonergic synapse	115/9434	0.0608696	18.524	10.856	6.87218e-08	1.13079e-07	1.70982e-08	7	KRAS/MAPK3/NRAS/BRAF/MAP2K1/RAF1/PRKCA
Organismal Systems	Immune system	hsa04670	Leukocyte transendothelial migration	116/9434	0.0603448	18.3643	10.8043	7.29712e-08	1.18989e-07	1.79919e-08	7	PIK3R2/PIK3CB/PIK3CD/CTNNB1/PTPN11/PIK3R3/PRKCA
Organismal Systems	Endocrine system	hsa04920	Adipocytokine signaling pathway	70/9434	0.0857143	26.0848	12.0949	8.53517e-08	1.37934e-07	2.08566e-08	6	AKT1/JAK2/STAT3/PTPN11/NFKB1/AKT3
Human Diseases	Infectious disease: bacterial	hsa05152	Tuberculosis	182/9434	0.043956	13.3768	9.68054	8.88186e-08	1.42267e-07	2.15117e-08	8	MAPK3/AKT1/RAF1/JAK2/SRC/NFKB1/AKT3/JAK1
Human Diseases	Neurodegenerative disease	hsa05017	Spinocerebellar ataxia	144/9434	0.0486111	14.7935	9.57677	3.22846e-07	5.12588e-07	7.75068e-08	7	AKT1/PIK3R2/PIK3CB/PIK3CD/PIK3R3/AKT3/PRKCA
Human Diseases	Endocrine and metabolic disease	hsa04930	Type II diabetes mellitus	47/9434	0.106383	32.3747	12.3805	3.80372e-07	5.98672e-07	9.05233e-08	5	MAPK3/PIK3R2/PIK3CB/PIK3CD/PIK3R3
Cellular Processes	Cellular community - eukaryotes	hsa04520	Adherens junction	93/9434	0.0645161	19.6337	10.3685	4.70811e-07	7.34628e-07	1.11081e-07	6	MAPK3/EGFR/SRC/CTNNB1/FYN/FGFR1
Human Diseases	Endocrine and metabolic disease	hsa04934	Cushing syndrome	155/9434	0.0451613	13.7436	9.18502	5.32927e-07	8.24442e-07	1.24661e-07	7	MAPK3/BRAF/EGFR/MAP2K1/CTNNB1/CDKN1A/CDKN1B
Organismal Systems	Sensory system	hsa04750	Inflammatory mediator regulation of TRP channels	99/9434	0.0606061	18.4438	10.0178	6.82688e-07	1.04717e-06	1.5834e-07	6	SRC/PIK3R2/PIK3CB/PIK3CD/PIK3R3/PRKCA
Human Diseases	Infectious disease: parasitic	hsa05146	Amoebiasis	103/9434	0.0582524	17.7275	9.80074	8.63212e-07	1.31295e-06	1.98527e-07	6	PIK3R2/PIK3CB/PIK3CD/NFKB1/PIK3R3/PRKCA
Environmental Information Processing	Signal transduction	hsa04152	AMPK signaling pathway	122/9434	0.0491803	14.9667	8.91506	2.33655e-06	3.52429e-06	5.32897e-07	6	AKT1/PIK3R2/PIK3CB/PIK3CD/PIK3R3/AKT3
Human Diseases	Infectious disease: bacterial	hsa05120	Epithelial cell signaling in Helicobacter pylori infection	71/9434	0.0704225	21.4312	9.92173	3.05492e-06	4.56975e-06	6.90977e-07	5	EGFR/SRC/JUN/PTPN11/NFKB1
Human Diseases	Infectious disease: parasitic	hsa05140	Leishmaniasis	79/9434	0.0632911	19.2609	9.35808	5.19148e-06	7.70212e-06	1.16461e-06	5	MAPK3/JAK2/JUN/NFKB1/JAK1
NA	NA	hsa04081	Hormone signaling	219/9434	0.0319635	9.72721	7.50278	5.40064e-06	7.94728e-06	1.20168e-06	7	JAK2/SRC/PIK3R2/PIK3CB/PIK3CD/STAT3/PIK3R3
Organismal Systems	Immune system	hsa04658	Th1 and Th2 cell differentiation	93/9434	0.0537634	16.3614	8.54769	1.15914e-05	1.69197e-05	2.55837e-06	5	MAPK3/JAK2/JUN/NFKB1/JAK1
Environmental Information Processing	Signal transduction	hsa04070	Phosphatidylinositol signaling system	98/9434	0.0510204	15.5267	8.29986	1.49729e-05	2.16807e-05	3.27827e-06	5	PIK3R2/PIK3CB/PIK3CD/PIK3R3/PRKCA
Human Diseases	Neurodegenerative disease	hsa05022	Pathways of neurodegeneration - multiple diseases	483/9434	0.0186335	5.67061	6.05039	1.64526e-05	2.36344e-05	3.57367e-06	9	KRAS/MAPK3/NRAS/BRAF/MAP2K1/RAF1/CTNNB1/NFKB1/PRKCA
Human Diseases	Infectious disease: bacterial	hsa05130	Pathogenic Escherichia coli infection	203/9434	0.0295567	8.99476	6.61152	4.33153e-05	6.17328e-05	9.33441e-06	6	MAPK3/SRC/JUN/PTPN11/NFKB1/FYN
Human Diseases	Immune disease	hsa05321	Inflammatory bowel disease	66/9434	0.0606061	18.4438	8.16511	5.96442e-05	8.43406e-05	1.27529e-05	4	JUN/STAT3/NFKB1/SMAD2
Organismal Systems	Circulatory system	hsa04270	Vascular smooth muscle contraction	134/9434	0.0373134	11.3553	6.93182	6.77443e-05	9.5052e-05	1.43725e-05	5	MAPK3/BRAF/MAP2K1/RAF1/PRKCA
Environmental Information Processing	Signal transduction	hsa04022	cGMP-PKG signaling pathway	166/9434	0.0301205	9.16634	6.09482	0.000186292	0.000259376	3.92194e-05	5	MAPK3/AKT1/MAP2K1/RAF1/AKT3
Human Diseases	Neurodegenerative disease	hsa05020	Prion disease	278/9434	0.0215827	6.56811	5.41066	0.000245405	0.000339072	5.12699e-05	6	MAPK3/PIK3R2/PIK3CB/PIK3CD/PIK3R3/FYN
Cellular Processes	Transport and catabolism	hsa04137	Mitophagy - animal	105/9434	0.0380952	11.5932	6.26727	0.000361778	0.000496074	7.50098e-05	4	KRAS/NRAS/SRC/JUN
Organismal Systems	Environmental adaptation	hsa04714	Thermogenesis	235/9434	0.0212766	6.47495	4.87996	0.000919567	0.00125144	0.000189226	5	KRAS/NRAS/SOS1/GRB2/FGFR1
Human Diseases	Endocrine and metabolic disease	hsa04936	Alcoholic liver disease	144/9434	0.0277778	8.45341	5.17488	0.00118906	0.00160612	0.000242856	4	AKT1/CTNNB1/NFKB1/AKT3
Organismal Systems	Circulatory system	hsa04261	Adrenergic signaling in cardiomyocytes	154/9434	0.025974	7.90448	4.9601	0.00152437	0.00204378	0.000309033	4	MAPK3/AKT1/AKT3/PRKCA
Cellular Processes	Transport and catabolism	hsa04148	Efferocytosis	157/9434	0.0254777	7.75344	4.89941	0.00163663	0.00217817	0.000329353	4	MAPK3/MAP2K1/JAK2/PTPN11
Human Diseases	Infectious disease: bacterial	hsa05133	Pertussis	78/9434	0.0384615	11.7047	5.45067	0.00206895	0.00273343	0.000413313	3	MAPK3/JUN/NFKB1
Organismal Systems	Immune system	hsa04621	NOD-like receptor signaling pathway	189/9434	0.021164	6.44069	4.33814	0.00321554	0.00421749	0.000637712	4	MAPK3/JUN/NFKB1/JAK1
Organismal Systems	Immune system	hsa04657	IL-17 signaling pathway	95/9434	0.0315789	9.61019	4.8428	0.00362512	0.00472048	0.000713768	3	MAPK3/JUN/NFKB1
Organismal Systems	Nervous system	hsa04728	Dopaminergic synapse	132/9434	0.0227273	6.91642	3.93034	0.00904139	0.0116892	0.00176749	3	AKT1/AKT3/PRKCA
Human Diseases	Substance dependence	hsa05030	Cocaine addiction	49/9434	0.0408163	12.4213	4.60225	0.0111644	0.0143316	0.00216704	2	JUN/NFKB1
Cellular Processes	Cell growth and death	hsa04110	Cell cycle	158/9434	0.0189873	5.77828	3.4777	0.0146966	0.018733	0.00283255	3	CDKN1A/SMAD2/CDKN1B
Cellular Processes	Cell growth and death	hsa04217	Necroptosis	159/9434	0.0188679	5.74194	3.46234	0.0149462	0.018918	0.00286053	3	JAK2/STAT3/JAK1
Cellular Processes	Cellular community - eukaryotes	hsa04530	Tight junction	170/9434	0.0176471	5.3704	3.30156	0.0178526	0.0224397	0.00339303	3	SRC/JUN/MAP3K1
Human Diseases	Cancer: specific types	hsa05217	Basal cell carcinoma	63/9434	0.031746	9.66103	3.96022	0.0180209	0.0224951	0.00340141	2	CTNNB1/CDKN1A
Environmental Information Processing	Signal transduction	hsa04310	Wnt signaling pathway	174/9434	0.0172414	5.24694	3.24652	0.0189826	0.0235332	0.00355839	3	JUN/CTNNB1/PRKCA
Human Diseases	Substance dependence	hsa05031	Amphetamine addiction	69/9434	0.0289855	8.82094	3.74371	0.0213855	0.0263318	0.00398154	2	JUN/PRKCA
Organismal Systems	Immune system	hsa04622	RIG-I-like receptor signaling pathway	72/9434	0.0277778	8.45341	3.6451	0.0231586	0.0283223	0.00428252	2	MAP3K1/NFKB1
Metabolism	Carbohydrate metabolism	hsa00562	Inositol phosphate metabolism	73/9434	0.0273973	8.3376	3.61349	0.0237627	0.0288661	0.00436475	2	PIK3CB/PIK3CD
Human Diseases	Cancer: overview	hsa05202	Transcriptional misregulation in cancer	201/9434	0.0149254	4.54213	2.9145	0.0276399	0.0333521	0.00504307	3	CDKN1A/NFKB1/CDKN1B
Organismal Systems	Nervous system	hsa04727	GABAergic synapse	89/9434	0.0224719	6.83871	3.17757	0.0342817	0.0410927	0.00621349	2	SRC/PRKCA
Organismal Systems	Environmental adaptation	hsa04713	Circadian entrainment	97/9434	0.0206186	6.27469	2.99814	0.0401074	0.0477594	0.00722155	2	MAPK3/PRKCA
STAD
Category	Subcategory	ID	Description	BgRatio	RichFactor	FoldEnrichment	zScore	pvalue	p.adjust	qvalue	Count	Gene_symbol
Human Diseases	Cancer: specific types	hsa05210	Colorectal cancer	87/9434	0.252874	79.5203	41.5561	5.23796e-40	9.06167e-38	9.92455e-39	22	AKT1/NRAS/HRAS/EGFR/SOS1/MYC/AXIN1/PIK3CB/TCF7L2/MAPK1/LEF1/SMAD3/RAC1/CCND1/RAF1/MAPK3/PIK3R2/MAP2K1/CDKN1A/MTOR/AKT3/GRB2
Human Diseases	Cancer: specific types	hsa05213	Endometrial cancer	59/9434	0.322034	101.269	43.6351	2.73599e-36	2.36663e-34	2.59199e-35	19	AKT1/NRAS/HRAS/EGFR/SOS1/MYC/AXIN1/PIK3CB/TCF7L2/MAPK1/LEF1/CCND1/RAF1/MAPK3/PIK3R2/MAP2K1/CDKN1A/AKT3/GRB2
Human Diseases	Cancer: specific types	hsa05225	Hepatocellular carcinoma	170/9434	0.135294	42.5455	30.873	3.01962e-35	1.74131e-33	1.90713e-34	23	AKT1/NRAS/HRAS/EGFR/SOS1/MYC/AXIN1/PIK3CB/TCF7L2/MAPK1/LEF1/SMAD3/PLCG1/CCND1/RAF1/SHC1/MAPK3/PIK3R2/MAP2K1/CDKN1A/MTOR/AKT3/GRB2
Human Diseases	Cancer: specific types	hsa05226	Gastric cancer	150/9434	0.146667	46.1218	31.4625	2.8836e-34	1.24716e-32	1.36591e-33	22	AKT1/NRAS/HRAS/EGFR/SOS1/MYC/AXIN1/PIK3CB/TCF7L2/MAPK1/LEF1/SMAD3/CCND1/RAF1/SHC1/MAPK3/PIK3R2/MAP2K1/CDKN1A/MTOR/AKT3/GRB2
Human Diseases	Infectious disease: viral	hsa05167	Kaposi sarcoma-associated herpesvirus infection	196/9434	0.117347	36.9017	28.6869	9.70203e-34	3.3569e-32	3.67656e-33	23	AKT1/NRAS/HRAS/MYC/SRC/PIK3CB/TCF7L2/MAPK1/LEF1/RAC1/PLCG1/CCND1/EP300/RAF1/MAPK3/PIK3R2/STAT3/MAP2K1/CREBBP/CDKN1A/MTOR/AKT3/JAK2
Human Diseases	Drug resistance: antineoplastic	hsa01521	EGFR tyrosine kinase inhibitor resistance	80/9434	0.2375	74.6858	37.3817	2.21708e-33	6.39257e-32	7.00129e-33	19	AKT1/NRAS/HRAS/EGFR/SOS1/SRC/PIK3CB/MAPK1/PLCG1/RAF1/SHC1/MAPK3/PIK3R2/STAT3/MAP2K1/MTOR/AKT3/JAK2/GRB2
Human Diseases	Cancer: specific types	hsa05215	Prostate cancer	106/9434	0.188679	59.3333	34.1118	4.26219e-33	1.05337e-31	1.15368e-32	20	AKT1/NRAS/HRAS/EGFR/SOS1/PIK3CB/TCF7L2/MAPK1/LEF1/CCND1/EP300/RAF1/MAPK3/PIK3R2/MAP2K1/CREBBP/CDKN1A/MTOR/AKT3/GRB2
Environmental Information Processing	Signal transduction	hsa04012	ErbB signaling pathway	86/9434	0.22093	69.4752	36.029	1.03752e-32	2.24364e-31	2.45729e-32	19	AKT1/NRAS/HRAS/EGFR/SOS1/MYC/SRC/PIK3CB/MAPK1/PLCG1/RAF1/SHC1/MAPK3/PIK3R2/MAP2K1/CDKN1A/MTOR/AKT3/GRB2
Human Diseases	Cancer: specific types	hsa05221	Acute myeloid leukemia	68/9434	0.264706	83.2412	38.4411	1.92571e-32	3.70164e-31	4.05413e-32	18	AKT1/NRAS/HRAS/SOS1/MYC/PIK3CB/TCF7L2/MAPK1/LEF1/CCND1/RAF1/MAPK3/PIK3R2/STAT3/MAP2K1/MTOR/AKT3/GRB2
Human Diseases	Cancer: specific types	hsa05224	Breast cancer	148/9434	0.141892	44.6203	30.2088	3.75491e-32	6.49599e-31	7.11456e-32	21	AKT1/NRAS/HRAS/EGFR/SOS1/MYC/AXIN1/PIK3CB/TCF7L2/MAPK1/LEF1/CCND1/RAF1/SHC1/MAPK3/PIK3R2/MAP2K1/CDKN1A/MTOR/AKT3/GRB2
Human Diseases	Cancer: specific types	hsa05214	Glioma	76/9434	0.236842	74.4789	36.3252	1.87604e-31	2.9505e-30	3.23146e-31	18	AKT1/NRAS/HRAS/EGFR/SOS1/PIK3CB/MAPK1/PLCG1/CCND1/RAF1/SHC1/MAPK3/PIK3R2/MAP2K1/CDKN1A/MTOR/AKT3/GRB2
Human Diseases	Cancer: specific types	hsa05220	Chronic myeloid leukemia	77/9434	0.233766	73.5117	36.084	2.44542e-31	3.52548e-30	3.86119e-31	18	AKT1/NRAS/HRAS/SOS1/MYC/PIK3CB/MAPK1/SMAD3/CCND1/RAF1/SHC1/PTPN11/MAPK3/PIK3R2/MAP2K1/CDKN1A/AKT3/GRB2
Human Diseases	Cancer: overview	hsa05205	Proteoglycans in cancer	204/9434	0.107843	33.9131	26.8418	3.72964e-31	4.9633e-30	5.43592e-31	22	AKT1/NRAS/HRAS/EGFR/SOS1/MYC/SRC/PIK3CB/MAPK1/RAC1/PLCG1/CCND1/RAF1/PTPN11/MAPK3/PIK3R2/STAT3/MAP2K1/CDKN1A/MTOR/AKT3/GRB2
Human Diseases	Cancer: specific types	hsa05211	Renal cell carcinoma	70/9434	0.242857	76.3705	35.7478	8.55305e-30	1.05691e-28	1.15756e-29	17	AKT1/NRAS/HRAS/SOS1/PIK3CB/MAPK1/RAC1/EP300/RAF1/PTPN11/MAPK3/PIK3R2/MAP2K1/CREBBP/CDKN1A/AKT3/GRB2
Organismal Systems	Endocrine system	hsa04917	Prolactin signaling pathway	71/9434	0.239437	75.2948	35.4903	1.12309e-29	1.2953e-28	1.41865e-29	17	AKT1/NRAS/HRAS/SOS1/SRC/PIK3CB/MAPK1/CCND1/RAF1/SHC1/MAPK3/PIK3R2/STAT3/MAP2K1/AKT3/JAK2/GRB2
Organismal Systems	Endocrine system	hsa04935	Growth hormone synthesis, secretion and action	122/9434	0.155738	48.9743	30.1229	1.49594e-29	1.61748e-28	1.77151e-29	19	AKT1/NRAS/HRAS/SOS1/PIK3CB/MAPK1/PLCG1/EP300/RAF1/SHC1/MAPK3/PIK3R2/STAT3/MAP2K1/CREBBP/MTOR/AKT3/JAK2/GRB2
Human Diseases	Cancer: specific types	hsa05223	Non-small cell lung cancer	73/9434	0.232877	73.232	34.9912	1.91153e-29	1.94527e-28	2.1305e-29	17	AKT1/NRAS/HRAS/EGFR/SOS1/PIK3CB/MAPK1/PLCG1/CCND1/RAF1/MAPK3/PIK3R2/STAT3/MAP2K1/CDKN1A/AKT3/GRB2
Human Diseases	Drug resistance: antineoplastic	hsa01522	Endocrine resistance	99/9434	0.181818	57.1758	31.735	3.66126e-29	3.51888e-28	3.85396e-29	18	AKT1/NRAS/HRAS/EGFR/SOS1/SRC/PIK3CB/MAPK1/CCND1/RAF1/SHC1/MAPK3/PIK3R2/MAP2K1/CDKN1A/MTOR/AKT3/GRB2
Human Diseases	Infectious disease: viral	hsa05161	Hepatitis B	163/9434	0.122699	38.5849	27.3384	4.41908e-29	4.02369e-28	4.40684e-29	20	AKT1/NRAS/HRAS/SOS1/MYC/SRC/PIK3CB/MAPK1/SMAD3/EP300/RAF1/MAPK3/PIK3R2/STAT3/MAP2K1/CREBBP/CDKN1A/AKT3/JAK2/GRB2
Environmental Information Processing	Signal transduction	hsa04068	FoxO signaling pathway	133/9434	0.142857	44.9238	28.8131	8.66409e-29	7.49443e-28	8.20808e-29	19	AKT1/NRAS/HRAS/EGFR/SOS1/PIK3CB/MAPK1/SMAD3/CCND1/EP300/RAF1/MAPK3/PIK3R2/STAT3/MAP2K1/CREBBP/CDKN1A/AKT3/GRB2
Human Diseases	Infectious disease: viral	hsa05163	Human cytomegalovirus infection	226/9434	0.0884956	27.8289	23.0571	4.04759e-26	3.33444e-25	3.65196e-26	20	AKT1/NRAS/HRAS/EGFR/SOS1/MYC/SRC/PIK3CB/MAPK1/RAC1/CCND1/RAF1/MAPK3/PIK3R2/STAT3/MAP2K1/CDKN1A/MTOR/AKT3/GRB2
Human Diseases	Cancer: overview	hsa05235	PD-L1 expression and PD-1 checkpoint pathway in cancer	90/9434	0.177778	55.9052	29.5595	1.51446e-25	1.19092e-24	1.30432e-25	16	AKT1/NRAS/HRAS/EGFR/PIK3CB/MAPK1/PLCG1/RAF1/PTPN11/MAPK3/PIK3R2/STAT3/MAP2K1/MTOR/AKT3/JAK2
Organismal Systems	Endocrine system	hsa04919	Thyroid hormone signaling pathway	122/9434	0.139344	43.8191	26.886	2.60319e-25	1.95805e-24	2.14451e-25	17	AKT1/NRAS/HRAS/MYC/SRC/PIK3CB/MAPK1/PLCG1/CCND1/EP300/RAF1/MAPK3/PIK3R2/MAP2K1/CREBBP/MTOR/AKT3
Human Diseases	Cancer: overview	hsa05231	Choline metabolism in cancer	99/9434	0.161616	50.8229	28.1461	7.87515e-25	5.67667e-24	6.21723e-25	16	AKT1/NRAS/HRAS/EGFR/SOS1/PIK3CB/MAPK1/RAC1/PLCG1/RAF1/MAPK3/PIK3R2/MAP2K1/MTOR/AKT3/GRB2
Environmental Information Processing	Signal transduction	hsa04630	JAK-STAT signaling pathway	168/9434	0.107143	33.6929	24.1485	9.2423e-25	6.39567e-24	7.00469e-25	18	AKT1/HRAS/EGFR/SOS1/MYC/PIK3CB/CCND1/EP300/RAF1/PTPN11/PIK3R2/STAT3/CREBBP/CDKN1A/MTOR/AKT3/JAK2/GRB2
Human Diseases	Cancer: overview	hsa05207	Chemical carcinogenesis - receptor activation	217/9434	0.0875576	27.5339	22.334	1.47901e-24	9.84113e-24	1.07782e-24	19	AKT1/NRAS/HRAS/EGFR/SOS1/MYC/SRC/PIK3CB/MAPK1/CCND1/RAF1/MAPK3/PIK3R2/STAT3/MAP2K1/MTOR/AKT3/JAK2/GRB2
Human Diseases	Cancer: specific types	hsa05212	Pancreatic cancer	77/9434	0.194805	61.2597	29.987	1.58027e-24	1.01254e-23	1.10896e-24	15	AKT1/EGFR/PIK3CB/MAPK1/SMAD3/RAC1/CCND1/RAF1/MAPK3/PIK3R2/STAT3/MAP2K1/CDKN1A/MTOR/AKT3
Environmental Information Processing	Signal transduction	hsa04072	Phospholipase D signaling pathway	149/9434	0.114094	35.8787	24.2377	9.37004e-24	5.78935e-23	6.34063e-24	17	AKT1/NRAS/HRAS/EGFR/SOS1/PIK3CB/MAPK1/PLCG1/RAF1/SHC1/PTPN11/MAPK3/PIK3R2/MAP2K1/MTOR/AKT3/GRB2
Organismal Systems	Immune system	hsa04062	Chemokine signaling pathway	193/9434	0.0932642	29.3285	22.458	1.23521e-23	7.36868e-23	8.07036e-24	18	AKT1/NRAS/HRAS/SOS1/SRC/PIK3CB/MAPK1/RAC1/PLCG1/RAF1/SHC1/MAPK3/PIK3R2/STAT3/MAP2K1/AKT3/JAK2/GRB2
Organismal Systems	Nervous system	hsa04722	Neurotrophin signaling pathway	120/9434	0.133333	41.9289	25.4848	2.0993e-23	1.2106e-22	1.32588e-23	16	AKT1/NRAS/HRAS/SOS1/PIK3CB/MAPK1/RAC1/PLCG1/RAF1/SHC1/PTPN11/MAPK3/PIK3R2/MAP2K1/AKT3/GRB2
Human Diseases	Infectious disease: viral	hsa05160	Hepatitis C	159/9434	0.106918	33.6222	23.4307	2.96794e-23	1.6563e-22	1.81402e-23	17	AKT1/NRAS/HRAS/EGFR/SOS1/MYC/PIK3CB/MAPK1/CCND1/RAF1/MAPK3/PIK3R2/STAT3/MAP2K1/CDKN1A/AKT3/GRB2
Organismal Systems	Immune system	hsa04664	Fc epsilon RI signaling pathway	69/9434	0.202899	63.8048	29.5728	4.09936e-23	2.21622e-22	2.42725e-23	14	AKT1/NRAS/HRAS/SOS1/PIK3CB/MAPK1/RAC1/PLCG1/RAF1/MAPK3/PIK3R2/MAP2K1/AKT3/GRB2
Human Diseases	Cancer: overview	hsa05206	MicroRNAs in cancer	319/9434	0.0626959	19.7158	19.2068	4.68703e-23	2.45714e-22	2.69112e-23	20	NRAS/HRAS/EGFR/SOS1/MYC/PIK3CB/MAPK1/PLCG1/CCND1/EP300/RAF1/SHC1/MAPK3/PIK3R2/STAT3/MAP2K1/CREBBP/CDKN1A/MTOR/GRB2
Human Diseases	Infectious disease: viral	hsa05165	Human papillomavirus infection	333/9434	0.0600601	18.8869	18.769	1.11931e-22	5.69534e-22	6.23767e-23	20	AKT1/NRAS/HRAS/EGFR/SOS1/AXIN1/PIK3CB/TCF7L2/MAPK1/CCND1/EP300/RAF1/MAPK3/PIK3R2/MAP2K1/CREBBP/CDKN1A/MTOR/AKT3/GRB2
Cellular Processes	Cellular community - eukaryotes	hsa04550	Signaling pathways regulating pluripotency of stem cells	144/9434	0.111111	34.9407	23.1806	4.49653e-22	2.22257e-21	2.43421e-22	16	AKT1/NRAS/HRAS/MYC/AXIN1/PIK3CB/MAPK1/SMAD3/RAF1/MAPK3/PIK3R2/STAT3/MAP2K1/AKT3/JAK2/GRB2
Environmental Information Processing	Signal transduction	hsa04370	VEGF signaling pathway	60/9434	0.216667	68.1344	29.4637	7.65707e-22	3.67965e-21	4.03004e-22	13	AKT1/NRAS/HRAS/SRC/PIK3CB/MAPK1/RAC1/PLCG1/RAF1/MAPK3/PIK3R2/MAP2K1/AKT3
Organismal Systems	Endocrine system	hsa04926	Relaxin signaling pathway	130/9434	0.115385	36.2846	22.8798	6.99178e-21	3.26913e-20	3.58043e-21	15	AKT1/NRAS/HRAS/EGFR/SOS1/SRC/PIK3CB/MAPK1/RAF1/SHC1/MAPK3/PIK3R2/MAP2K1/AKT3/GRB2
Human Diseases	Cancer: overview	hsa05230	Central carbon metabolism in cancer	71/9434	0.183099	57.5784	27.0272	8.45275e-21	3.84822e-20	4.21467e-21	13	AKT1/NRAS/HRAS/EGFR/MYC/PIK3CB/MAPK1/RAF1/MAPK3/PIK3R2/MAP2K1/MTOR/AKT3
Human Diseases	Cancer: specific types	hsa05218	Melanoma	73/9434	0.178082	56.0009	26.644	1.25079e-20	5.54839e-20	6.07673e-21	13	AKT1/NRAS/HRAS/EGFR/PIK3CB/MAPK1/CCND1/RAF1/MAPK3/PIK3R2/MAP2K1/CDKN1A/AKT3
Human Diseases	Endocrine and metabolic disease	hsa04933	AGE-RAGE signaling pathway in diabetic complications	101/9434	0.138614	43.5894	24.3042	1.29241e-20	5.58968e-20	6.12195e-21	14	AKT1/NRAS/HRAS/PIK3CB/MAPK1/SMAD3/RAC1/PLCG1/CCND1/MAPK3/PIK3R2/STAT3/AKT3/JAK2
Organismal Systems	Endocrine system	hsa04915	Estrogen signaling pathway	139/9434	0.107914	33.9353	22.0939	1.99179e-20	8.4044e-20	9.2047e-21	15	AKT1/NRAS/HRAS/EGFR/SOS1/SRC/PIK3CB/MAPK1/RAF1/SHC1/MAPK3/PIK3R2/MAP2K1/AKT3/GRB2
Environmental Information Processing	Signal transduction	hsa04151	PI3K-Akt signaling pathway	362/9434	0.0524862	16.5052	16.9906	2.91417e-20	1.20036e-19	1.31466e-20	19	AKT1/NRAS/HRAS/EGFR/SOS1/MYC/PIK3CB/MAPK1/RAC1/CCND1/RAF1/MAPK3/PIK3R2/MAP2K1/CDKN1A/MTOR/AKT3/JAK2/GRB2
Environmental Information Processing	Signal transduction	hsa04014	Ras signaling pathway	238/9434	0.0714286	22.4619	18.9403	3.4346e-20	1.38183e-19	1.51341e-20	17	AKT1/NRAS/HRAS/EGFR/SOS1/PIK3CB/MAPK1/RAC1/PLCG1/RAF1/SHC1/PTPN11/MAPK3/PIK3R2/MAP2K1/AKT3/GRB2
Environmental Information Processing	Signal transduction	hsa04066	HIF-1 signaling pathway	110/9434	0.127273	40.023	23.2512	4.56236e-20	1.79384e-19	1.96465e-20	14	AKT1/EGFR/PIK3CB/MAPK1/PLCG1/EP300/MAPK3/PIK3R2/STAT3/MAP2K1/CREBBP/CDKN1A/MTOR/AKT3
Human Diseases	Cancer: specific types	hsa05219	Bladder cancer	41/9434	0.268293	84.3691	30.2151	1.2443e-19	4.78362e-19	5.23914e-20	11	NRAS/HRAS/EGFR/MYC/SRC/MAPK1/CCND1/RAF1/MAPK3/MAP2K1/CDKN1A
Cellular Processes	Cellular community - eukaryotes	hsa04510	Focal adhesion	203/9434	0.0788177	24.7856	19.3493	1.30232e-19	4.86311e-19	5.32619e-20	16	AKT1/HRAS/EGFR/SOS1/SRC/PIK3CB/MAPK1/RAC1/CCND1/RAF1/SHC1/MAPK3/PIK3R2/MAP2K1/AKT3/GRB2
Cellular Processes	Cell growth and death	hsa04218	Cellular senescence	157/9434	0.0955414	30.0446	20.7272	1.32119e-19	4.86311e-19	5.32619e-20	15	AKT1/NRAS/HRAS/MYC/PIK3CB/MAPK1/SMAD3/CCND1/RAF1/MAPK3/PIK3R2/MAP2K1/CDKN1A/MTOR/AKT3
Organismal Systems	Immune system	hsa04660	T cell receptor signaling pathway	122/9434	0.114754	36.0863	22.0306	2.08323e-19	7.5083e-19	8.22327e-20	14	AKT1/NRAS/HRAS/SOS1/PIK3CB/MAPK1/PLCG1/RAF1/PTPN11/MAPK3/PIK3R2/MAP2K1/AKT3/GRB2
Organismal Systems	Immune system	hsa04662	B cell receptor signaling pathway	91/9434	0.142857	44.9238	23.7797	2.6966e-19	9.52066e-19	1.04272e-19	13	AKT1/NRAS/HRAS/SOS1/PIK3CB/MAPK1/RAC1/RAF1/MAPK3/PIK3R2/MAP2K1/AKT3/GRB2
Human Diseases	Cancer: overview	hsa05208	Chemical carcinogenesis - reactive oxygen species	227/9434	0.0704846	22.1651	18.2307	8.03244e-19	2.77024e-18	3.03403e-19	16	AKT1/NRAS/HRAS/EGFR/SOS1/SRC/PIK3CB/MAPK1/RAC1/RAF1/PTPN11/MAPK3/PIK3R2/MAP2K1/AKT3/GRB2
Organismal Systems	Immune system	hsa04650	Natural killer cell mediated cytotoxicity	134/9434	0.104478	32.8547	20.9756	8.1666e-19	2.77024e-18	3.03403e-19	14	NRAS/HRAS/SOS1/PIK3CB/MAPK1/RAC1/PLCG1/RAF1/SHC1/PTPN11/MAPK3/PIK3R2/MAP2K1/GRB2
Organismal Systems	Endocrine system	hsa04910	Insulin signaling pathway	138/9434	0.101449	31.9024	20.6544	1.25099e-18	4.16195e-18	4.55827e-19	14	AKT1/NRAS/HRAS/SOS1/PIK3CB/MAPK1/RAF1/SHC1/MAPK3/PIK3R2/MAP2K1/MTOR/AKT3/GRB2
Human Diseases	Cancer: specific types	hsa05216	Thyroid cancer	37/9434	0.27027	84.991	28.9113	6.48592e-18	2.1171e-17	2.3187e-18	10	NRAS/HRAS/MYC/TCF7L2/MAPK1/LEF1/CCND1/MAPK3/MAP2K1/CDKN1A
Human Diseases	Infectious disease: viral	hsa05166	Human T-cell leukemia virus 1 infection	224/9434	0.0669643	21.058	17.1598	3.04582e-17	9.75789e-17	1.06871e-17	15	AKT1/NRAS/HRAS/MYC/PIK3CB/MAPK1/SMAD3/CCND1/EP300/MAPK3/PIK3R2/MAP2K1/CREBBP/CDKN1A/AKT3
Human Diseases	Cancer: overview	hsa05203	Viral carcinogenesis	205/9434	0.0682927	21.4758	16.7405	3.59503e-16	1.1308e-15	1.23848e-16	14	NRAS/HRAS/SRC/PIK3CB/MAPK1/RAC1/CCND1/EP300/MAPK3/PIK3R2/STAT3/CREBBP/CDKN1A/GRB2
Environmental Information Processing	Signal transduction	hsa04150	mTOR signaling pathway	158/9434	0.0822785	25.8738	17.8082	4.64317e-16	1.43441e-15	1.571e-16	13	AKT1/NRAS/HRAS/SOS1/PIK3CB/MAPK1/RAF1/MAPK3/PIK3R2/MAP2K1/MTOR/AKT3/GRB2
Environmental Information Processing	Signal transduction	hsa04015	Rap1 signaling pathway	212/9434	0.0660377	20.7667	16.4406	5.77555e-16	1.75293e-15	1.91985e-16	14	AKT1/NRAS/HRAS/EGFR/SRC/PIK3CB/MAPK1/RAC1/PLCG1/RAF1/MAPK3/PIK3R2/MAP2K1/AKT3
Cellular Processes	Cell motility	hsa04810	Regulation of actin cytoskeleton	232/9434	0.0603448	18.9764	15.658	2.05319e-15	6.12416e-15	6.70733e-16	14	AKT1/NRAS/HRAS/EGFR/SOS1/SRC/PIK3CB/MAPK1/RAC1/RAF1/MAPK3/PIK3R2/MAP2K1/AKT3
Organismal Systems	Endocrine system	hsa04929	GnRH secretion	65/9434	0.153846	48.3795	21.6486	3.15723e-15	9.25763e-15	1.01392e-15	10	AKT1/NRAS/HRAS/PIK3CB/MAPK1/RAF1/MAPK3/PIK3R2/MAP2K1/AKT3
Organismal Systems	Immune system	hsa04625	C-type lectin receptor signaling pathway	105/9434	0.104762	32.9441	18.5908	8.71109e-15	2.5117e-14	2.75087e-15	11	AKT1/NRAS/HRAS/SRC/PIK3CB/MAPK1/RAF1/PTPN11/MAPK3/PIK3R2/AKT3
Human Diseases	Infectious disease: viral	hsa05170	Human immunodeficiency virus 1 infection	213/9434	0.0610329	19.1928	15.168	2.34727e-14	6.657e-14	7.29091e-15	13	AKT1/NRAS/HRAS/PIK3CB/MAPK1/RAC1/PLCG1/RAF1/MAPK3/PIK3R2/MAP2K1/MTOR/AKT3
Human Diseases	Cardiovascular disease	hsa05417	Lipid and atherosclerosis	216/9434	0.0601852	18.9262	15.0531	2.81579e-14	7.85695e-14	8.60512e-15	13	AKT1/NRAS/HRAS/SRC/PIK3CB/MAPK1/RAC1/PLCG1/MAPK3/PIK3R2/STAT3/AKT3/JAK2
Environmental Information Processing	Signal transduction	hsa04071	Sphingolipid signaling pathway	122/9434	0.0901639	28.3536	17.1752	4.75318e-14	1.30524e-13	1.42953e-14	11	AKT1/NRAS/HRAS/PIK3CB/MAPK1/RAC1/RAF1/MAPK3/PIK3R2/MAP2K1/AKT3
Cellular Processes	Cellular community - eukaryotes	hsa04540	Gap junction	92/9434	0.108696	34.1812	18.0632	1.20677e-13	3.26205e-13	3.57267e-14	10	NRAS/HRAS/EGFR/SOS1/SRC/MAPK1/RAF1/MAPK3/MAP2K1/GRB2
Cellular Processes	Cellular community - eukaryotes	hsa04520	Adherens junction	93/9434	0.107527	33.8136	17.9609	1.34954e-13	3.53742e-13	3.87427e-14	10	EGFR/SRC/TCF7L2/MAPK1/LEF1/SMAD3/RAC1/EP300/MAPK3/CREBBP
Organismal Systems	Endocrine system	hsa04912	GnRH signaling pathway	93/9434	0.107527	33.8136	17.9609	1.34954e-13	3.53742e-13	3.87427e-14	10	NRAS/HRAS/EGFR/SOS1/SRC/MAPK1/RAF1/MAPK3/MAP2K1/GRB2
Environmental Information Processing	Signal transduction	hsa04371	Apelin signaling pathway	140/9434	0.0785714	24.7081	15.962	2.22042e-13	5.73333e-13	6.27928e-14	11	AKT1/NRAS/HRAS/MAPK1/SMAD3/CCND1/RAF1/MAPK3/MAP2K1/MTOR/AKT3
Organismal Systems	Immune system	hsa04666	Fc gamma R-mediated phagocytosis	99/9434	0.10101	31.7643	17.3795	2.57208e-13	6.54368e-13	7.16679e-14	10	AKT1/PIK3CB/MAPK1/RAC1/PLCG1/RAF1/MAPK3/PIK3R2/MAP2K1/AKT3
Organismal Systems	Immune system	hsa04613	Neutrophil extracellular trap formation	196/9434	0.0612245	19.2531	14.5849	2.87982e-13	7.22042e-13	7.90798e-14	12	AKT1/SRC/PIK3CB/MAPK1/RAC1/PLCG1/RAF1/MAPK3/PIK3R2/MAP2K1/MTOR/AKT3
Organismal Systems	Endocrine system	hsa04916	Melanogenesis	101/9434	0.0990099	31.1353	17.1971	3.1596e-13	7.80874e-13	8.55231e-14	10	NRAS/HRAS/TCF7L2/MAPK1/LEF1/EP300/RAF1/MAPK3/MAP2K1/CREBBP
Organismal Systems	Nervous system	hsa04725	Cholinergic synapse	116/9434	0.0862069	27.1092	15.9805	1.3029e-12	3.17467e-12	3.47697e-13	10	AKT1/NRAS/HRAS/PIK3CB/MAPK1/MAPK3/PIK3R2/MAP2K1/AKT3/JAK2
Cellular Processes	Transport and catabolism	hsa04140	Autophagy - animal	169/9434	0.0650888	20.4682	14.4237	1.79013e-12	4.30127e-12	4.71086e-13	11	AKT1/NRAS/HRAS/PIK3CB/MAPK1/RAF1/MAPK3/PIK3R2/MAP2K1/MTOR/AKT3
Environmental Information Processing	Signal transduction	hsa04010	MAPK signaling pathway	300/9434	0.0433333	13.6269	12.5532	1.93708e-12	4.5906e-12	5.02774e-13	13	AKT1/NRAS/HRAS/EGFR/SOS1/MYC/MAPK1/RAC1/RAF1/MAPK3/MAP2K1/AKT3/GRB2
Human Diseases	Infectious disease: viral	hsa05164	Influenza A	173/9434	0.0635838	19.995	14.2417	2.31626e-12	5.41504e-12	5.93068e-13	11	AKT1/PIK3CB/MAPK1/EP300/RAF1/MAPK3/PIK3R2/MAP2K1/CREBBP/AKT3/JAK2
Organismal Systems	Development and regeneration	hsa04360	Axon guidance	184/9434	0.0597826	18.7996	13.7714	4.55937e-12	1.05169e-11	1.15184e-12	11	NRAS/HRAS/SRC/PIK3CB/MAPK1/RAC1/PLCG1/RAF1/PTPN11/MAPK3/PIK3R2
Human Diseases	Infectious disease: bacterial	hsa05132	Salmonella infection	251/9434	0.0478088	15.0343	12.7281	5.4781e-12	1.24699e-11	1.36573e-12	12	AKT1/HRAS/MYC/PIK3CB/TCF7L2/MAPK1/LEF1/RAC1/RAF1/MAPK3/MAP2K1/AKT3
Cellular Processes	Cell growth and death	hsa04210	Apoptosis	137/9434	0.0729927	22.9538	14.6193	7.03012e-12	1.57949e-11	1.7299e-12	10	AKT1/NRAS/HRAS/PIK3CB/MAPK1/RAF1/MAPK3/PIK3R2/MAP2K1/AKT3
Human Diseases	Infectious disease: bacterial	hsa05135	Yersinia infection	138/9434	0.0724638	22.7874	14.5622	7.56457e-12	1.67778e-11	1.83755e-12	10	AKT1/SRC/PIK3CB/MAPK1/RAC1/PLCG1/MAPK3/PIK3R2/MAP2K1/AKT3
Organismal Systems	Nervous system	hsa04720	Long-term potentiation	67/9434	0.119403	37.5483	16.9564	2.1762e-11	4.7656e-11	5.2194e-12	8	NRAS/HRAS/MAPK1/EP300/RAF1/MAPK3/MAP2K1/CREBBP
Organismal Systems	Endocrine system	hsa04921	Oxytocin signaling pathway	155/9434	0.0645161	20.2882	13.6753	2.42736e-11	5.24917e-11	5.74902e-12	10	NRAS/HRAS/EGFR/SRC/MAPK1/CCND1/RAF1/MAPK3/MAP2K1/CDKN1A
Environmental Information Processing	Signal transduction	hsa04024	cAMP signaling pathway	226/9434	0.0486726	15.3059	12.2946	4.28338e-11	9.14845e-11	1.00196e-11	11	AKT1/PIK3CB/MAPK1/RAC1/EP300/RAF1/MAPK3/PIK3R2/MAP2K1/CREBBP/AKT3
Human Diseases	Infectious disease: bacterial	hsa05131	Shigellosis	253/9434	0.0434783	13.6725	11.54	1.44684e-10	3.05249e-10	3.34316e-11	11	AKT1/EGFR/SRC/PIK3CB/MAPK1/RAC1/PLCG1/MAPK3/PIK3R2/MTOR/AKT3
Organismal Systems	Development and regeneration	hsa04380	Osteoclast differentiation	143/9434	0.0629371	19.7916	12.7888	3.58094e-10	7.46389e-10	8.17463e-11	9	AKT1/PIK3CB/MAPK1/RAC1/MAPK3/PIK3R2/MAP2K1/AKT3/GRB2
Organismal Systems	Aging	hsa04213	Longevity regulating pathway - multiple species	62/9434	0.112903	35.5043	15.3951	6.75953e-10	1.39214e-09	1.52471e-10	7	AKT1/NRAS/HRAS/PIK3CB/PIK3R2/MTOR/AKT3
Human Diseases	Endocrine and metabolic disease	hsa04934	Cushing syndrome	155/9434	0.0580645	18.2594	12.2368	7.36524e-10	1.49904e-09	1.64179e-10	9	EGFR/AXIN1/TCF7L2/MAPK1/LEF1/CCND1/MAPK3/MAP2K1/CDKN1A
Human Diseases	Neurodegenerative disease	hsa05010	Alzheimer disease	391/9434	0.0306905	9.65115	9.86814	9.55695e-10	1.9225e-09	2.10557e-10	12	AKT1/NRAS/HRAS/AXIN1/PIK3CB/MAPK1/RAF1/MAPK3/PIK3R2/MAP2K1/MTOR/AKT3
Organismal Systems	Immune system	hsa04620	Toll-like receptor signaling pathway	109/9434	0.0733945	23.0801	13.0954	1.16114e-09	2.30893e-09	2.52879e-10	8	AKT1/PIK3CB/MAPK1/RAC1/MAPK3/PIK3R2/MAP2K1/AKT3
Organismal Systems	Endocrine system	hsa04914	Progesterone-mediated oocyte maturation	111/9434	0.0720721	22.6643	12.9675	1.34383e-09	2.64185e-09	2.89342e-10	8	AKT1/PIK3CB/MAPK1/RAF1/MAPK3/PIK3R2/MAP2K1/AKT3
Environmental Information Processing	Signal transduction	hsa04310	Wnt signaling pathway	174/9434	0.0517241	16.2655	11.4792	2.05966e-09	4.00361e-09	4.38485e-10	9	MYC/AXIN1/TCF7L2/LEF1/SMAD3/RAC1/CCND1/EP300/CREBBP
Human Diseases	Drug resistance: antineoplastic	hsa01524	Platinum drug resistance	75/9434	0.0933333	29.3502	13.922	2.65304e-09	5.09974e-09	5.58536e-10	7	AKT1/PIK3CB/MAPK1/MAPK3/PIK3R2/CDKN1A/AKT3
Human Diseases	Infectious disease: bacterial	hsa05152	Tuberculosis	182/9434	0.0494505	15.5505	11.1951	3.06557e-09	5.82795e-09	6.38291e-10	9	AKT1/SRC/MAPK1/EP300/RAF1/MAPK3/CREBBP/AKT3/JAK2
Human Diseases	Substance dependence	hsa05034	Alcoholism	191/9434	0.0471204	14.8178	10.8963	4.69237e-09	8.8237e-09	9.66392e-10	9	NRAS/HRAS/SOS1/MAPK1/RAF1/SHC1/MAPK3/MAP2K1/GRB2
Human Diseases	Infectious disease: viral	hsa05169	Epstein-Barr virus infection	204/9434	0.0441176	13.8735	10.4988	8.36834e-09	1.55669e-08	1.70492e-09	9	AKT1/MYC/PIK3CB/RAC1/CCND1/PIK3R2/STAT3/CDKN1A/AKT3
Organismal Systems	Aging	hsa04211	Longevity regulating pathway	90/9434	0.0777778	24.4585	12.6295	9.67024e-09	1.77974e-08	1.94921e-09	7	AKT1/NRAS/HRAS/PIK3CB/PIK3R2/MTOR/AKT3
Human Diseases	Cancer: specific types	hsa05222	Small cell lung cancer	93/9434	0.0752688	23.6695	12.4084	1.2183e-08	2.21859e-08	2.42985e-09	7	AKT1/MYC/PIK3CB/CCND1/PIK3R2/CDKN1A/AKT3
Organismal Systems	Nervous system	hsa04730	Long-term depression	60/9434	0.1	31.4467	13.3623	2.70211e-08	4.86944e-08	5.33312e-09	6	NRAS/HRAS/MAPK1/RAF1/MAPK3/MAP2K1
Organismal Systems	Immune system	hsa04659	Th17 cell differentiation	109/9434	0.0642202	20.1951	11.3844	3.70232e-08	6.53573e-08	7.15809e-09	7	MAPK1/SMAD3/PLCG1/MAPK3/STAT3/MTOR/JAK2
Human Diseases	Endocrine and metabolic disease	hsa04931	Insulin resistance	109/9434	0.0642202	20.1951	11.3844	3.70232e-08	6.53573e-08	7.15809e-09	7	AKT1/PIK3CB/PTPN11/PIK3R2/STAT3/MTOR/AKT3
Human Diseases	Infectious disease: viral	hsa05168	Herpes simplex virus 1 infection	182/9434	0.043956	13.8227	9.86568	6.69941e-08	1.1707e-07	1.28218e-08	8	AKT1/SRC/PIK3CB/PTPN11/PIK3R2/MTOR/AKT3/JAK2
Environmental Information Processing	Signal transduction	hsa04668	TNF signaling pathway	119/9434	0.0588235	18.498	10.8493	6.81221e-08	1.17851e-07	1.29073e-08	7	AKT1/PIK3CB/MAPK1/MAPK3/PIK3R2/MAP2K1/AKT3
Organismal Systems	Endocrine system	hsa04920	Adipocytokine signaling pathway	70/9434	0.0857143	26.9543	12.31	6.92345e-08	1.1859e-07	1.29882e-08	6	AKT1/PTPN11/STAT3/MTOR/AKT3/JAK2
Organismal Systems	Immune system	hsa04611	Platelet activation	126/9434	0.0555556	17.4704	10.5121	1.01141e-07	1.71543e-07	1.87878e-08	7	AKT1/SRC/PIK3CB/MAPK1/MAPK3/PIK3R2/AKT3
Human Diseases	Endocrine and metabolic disease	hsa04930	Type II diabetes mellitus	47/9434	0.106383	33.4539	12.5974	3.2021e-07	5.37828e-07	5.89042e-08	5	PIK3CB/MAPK1/MAPK3/PIK3R2/MTOR
Human Diseases	Infectious disease: parasitic	hsa05142	Chagas disease	103/9434	0.0582524	18.3184	9.98143	7.02317e-07	1.16828e-06	1.27953e-07	6	AKT1/PIK3CB/MAPK1/MAPK3/PIK3R2/AKT3
Environmental Information Processing	Signal transduction	hsa04350	TGF-beta signaling pathway	110/9434	0.0545455	17.1527	9.62433	1.03601e-06	1.70695e-06	1.86949e-07	6	MYC/MAPK1/SMAD3/EP300/MAPK3/CREBBP
Human Diseases	Infectious disease: parasitic	hsa05145	Toxoplasmosis	112/9434	0.0535714	16.8464	9.52829	1.15214e-06	1.88037e-06	2.05943e-07	6	AKT1/MAPK1/MAPK3/STAT3/AKT3/JAK2
Human Diseases	Neurodegenerative disease	hsa05022	Pathways of neurodegeneration - multiple diseases	483/9434	0.0207039	6.5107	7.02221	1.34041e-06	2.13654e-06	2.33999e-07	10	NRAS/HRAS/AXIN1/MAPK1/RAC1/PLCG1/RAF1/MAPK3/MAP2K1/MTOR
Organismal Systems	Nervous system	hsa04726	Serotonergic synapse	115/9434	0.0521739	16.407	9.38881	1.34614e-06	2.13654e-06	2.33999e-07	6	NRAS/HRAS/MAPK1/RAF1/MAPK3/MAP2K1
Organismal Systems	Endocrine system	hsa04928	Parathyroid hormone synthesis, secretion and action	115/9434	0.0521739	16.407	9.38881	1.34614e-06	2.13654e-06	2.33999e-07	6	EGFR/MAPK1/RAF1/MAPK3/MAP2K1/CDKN1A
Environmental Information Processing	Signal transduction	hsa04152	AMPK signaling pathway	122/9434	0.0491803	15.4656	9.08287	1.90433e-06	2.99499e-06	3.28019e-07	6	AKT1/PIK3CB/CCND1/PIK3R2/MTOR/AKT3
Human Diseases	Infectious disease: bacterial	hsa05120	Epithelial cell signaling in Helicobacter pylori infection	71/9434	0.0704225	22.1455	10.1011	2.57719e-06	4.0167e-06	4.39919e-07	5	EGFR/SRC/RAC1/PLCG1/PTPN11
Human Diseases	Cardiovascular disease	hsa05415	Diabetic cardiomyopathy	205/9434	0.0341463	10.7379	7.96148	2.74975e-06	4.24738e-06	4.65183e-07	7	AKT1/PIK3CB/SMAD3/RAC1/PIK3R2/MTOR/AKT3
Human Diseases	Infectious disease: viral	hsa05162	Measles	139/9434	0.0431655	13.5741	8.43507	4.07544e-06	6.23939e-06	6.83353e-07	6	AKT1/PIK3CB/CCND1/PIK3R2/STAT3/AKT3
Human Diseases	Infectious disease: bacterial	hsa05100	Bacterial invasion of epithelial cells	78/9434	0.0641026	20.1581	9.59587	4.11446e-06	6.24387e-06	6.83843e-07	5	SRC/PIK3CB/RAC1/SHC1/PIK3R2
Human Diseases	Cardiovascular disease	hsa05418	Fluid shear stress and atherosclerosis	142/9434	0.0422535	13.2873	8.33252	4.61285e-06	6.93933e-06	7.60012e-07	6	AKT1/SRC/PIK3CB/RAC1/PIK3R2/AKT3
Organismal Systems	Excretory system	hsa04960	Aldosterone-regulated sodium reabsorption	38/9434	0.105263	33.1018	11.199	5.68951e-06	8.48522e-06	9.29322e-07	4	PIK3CB/MAPK1/MAPK3/PIK3R2
Human Diseases	Infectious disease: viral	hsa05171	Coronavirus disease - COVID-19	238/9434	0.0294118	9.24902	7.27982	7.3847e-06	1.09193e-05	1.1959e-06	7	EGFR/PIK3CB/MAPK1/PLCG1/MAPK3/PIK3R2/STAT3
Cellular Processes	Transport and catabolism	hsa04148	Efferocytosis	157/9434	0.0382166	12.0178	7.8627	8.23776e-06	1.19759e-05	1.31163e-06	6	MAPK1/RAC1/PTPN11/MAPK3/MAP2K1/JAK2
Environmental Information Processing	Signal transduction	hsa04390	Hippo signaling pathway	157/9434	0.0382166	12.0178	7.8627	8.23776e-06	1.19759e-05	1.31163e-06	6	MYC/AXIN1/TCF7L2/LEF1/SMAD3/CCND1
Cellular Processes	Cell growth and death	hsa04110	Cell cycle	158/9434	0.0379747	11.9418	7.83367	8.54412e-06	1.23178e-05	1.34907e-06	6	MYC/SMAD3/CCND1/EP300/CREBBP/CDKN1A
Environmental Information Processing	Signal transduction	hsa04022	cGMP-PKG signaling pathway	166/9434	0.0361446	11.3663	7.61049	1.13439e-05	1.6219e-05	1.77635e-06	6	AKT1/MAPK1/RAF1/MAPK3/MAP2K1/AKT3
Organismal Systems	Digestive system	hsa04973	Carbohydrate digestion and absorption	52/9434	0.0769231	24.1897	9.47064	2.02319e-05	2.86894e-05	3.14213e-06	4	AKT1/PIK3CB/PIK3R2/AKT3
Organismal Systems	Immune system	hsa04670	Leukocyte transendothelial migration	116/9434	0.0431034	13.5546	7.68422	2.87335e-05	4.04137e-05	4.42621e-06	5	PIK3CB/RAC1/PLCG1/PTPN11/PIK3R2
Organismal Systems	Endocrine system	hsa04923	Regulation of lipolysis in adipocytes	59/9434	0.0677966	21.3198	8.84277	3.3491e-05	4.67253e-05	5.11747e-06	4	AKT1/PIK3CB/PIK3R2/AKT3
Human Diseases	Cancer: specific types	hsa05217	Basal cell carcinoma	63/9434	0.0634921	19.9661	8.53072	4.34474e-05	6.01312e-05	6.58571e-06	4	AXIN1/TCF7L2/LEF1/CDKN1A
Human Diseases	Endocrine and metabolic disease	hsa04936	Alcoholic liver disease	144/9434	0.0347222	10.919	6.77438	8.09811e-05	0.000110313	1.20817e-05	5	AKT1/TCF7L2/LEF1/CCND1/AKT3
Human Diseases	Neurodegenerative disease	hsa05017	Spinocerebellar ataxia	144/9434	0.0347222	10.919	6.77438	8.09811e-05	0.000110313	1.20817e-05	5	AKT1/PIK3CB/PIK3R2/MTOR/AKT3
Human Diseases	Endocrine and metabolic disease	hsa04932	Non-alcoholic fatty liver disease	157/9434	0.0318471	10.0149	6.43331	0.000121923	0.000164786	1.80478e-05	5	AKT1/PIK3CB/RAC1/PIK3R2/AKT3
Organismal Systems	Immune system	hsa04658	Th1 and Th2 cell differentiation	93/9434	0.0430108	13.5254	6.85594	0.000199319	0.000267304	2.92757e-05	4	MAPK1/PLCG1/MAPK3/JAK2
Organismal Systems	Sensory system	hsa04750	Inflammatory mediator regulation of TRP channels	99/9434	0.040404	12.7057	6.61284	0.000253599	0.000337482	3.69618e-05	4	SRC/PIK3CB/PLCG1/PIK3R2
Organismal Systems	Endocrine system	hsa04922	Glucagon signaling pathway	107/9434	0.0373832	11.7558	6.31963	0.000341578	0.000451091	4.94046e-05	4	AKT1/EP300/CREBBP/AKT3
Human Diseases	Infectious disease: bacterial	hsa05130	Pathogenic Escherichia coli infection	203/9434	0.0246305	7.74548	5.48739	0.000403711	0.000529107	5.7949e-05	5	SRC/MAPK1/RAC1/PTPN11/MAPK3
NA	NA	hsa04081	Hormone signaling	219/9434	0.0228311	7.1796	5.22594	0.000571418	0.000743273	8.1405e-05	5	SRC/PIK3CB/PIK3R2/STAT3/JAK2
Organismal Systems	Environmental adaptation	hsa04714	Thermogenesis	235/9434	0.0212766	6.69078	4.98959	0.000787034	0.0010161	0.000111285	5	NRAS/HRAS/SOS1/MTOR/GRB2
Organismal Systems	Circulatory system	hsa04270	Vascular smooth muscle contraction	134/9434	0.0298507	9.38706	5.52268	0.000800774	0.00102618	0.000112389	4	MAPK1/RAF1/MAPK3/MAP2K1
Organismal Systems	Circulatory system	hsa04261	Adrenergic signaling in cardiomyocytes	154/9434	0.025974	8.16797	5.06537	0.00134457	0.00171038	0.000187325	4	AKT1/MAPK1/MAPK3/AKT3
Human Diseases	Neurodegenerative disease	hsa05020	Prion disease	278/9434	0.0179856	5.65588	4.45041	0.00166815	0.0021065	0.000230709	5	PIK3CB/MAPK1/RAC1/MAPK3/PIK3R2
Human Diseases	Infectious disease: parasitic	hsa05140	Leishmaniasis	79/9434	0.0379747	11.9418	5.5158	0.00194987	0.00244441	0.000267717	3	MAPK1/MAPK3/JAK2
Environmental Information Processing	Signal transduction	hsa04070	Phosphatidylinositol signaling system	98/9434	0.0306122	9.62653	4.8484	0.00360099	0.00448181	0.000490858	3	PIK3CB/PLCG1/PIK3R2
Cellular Processes	Transport and catabolism	hsa04137	Mitophagy - animal	105/9434	0.0285714	8.98476	4.64695	0.0043724	0.00540303	0.000591753	3	NRAS/HRAS/SRC
Cellular Processes	Transport and catabolism	hsa04144	Endocytosis	252/9434	0.015873	4.99153	3.62744	0.00788849	0.00967878	0.00106004	4	HRAS/EGFR/SRC/SMAD3
Cellular Processes	Cell growth and death	hsa04114	Oocyte meiosis	139/9434	0.0215827	6.78705	3.88212	0.00950128	0.0115755	0.00126778	3	MAPK1/MAPK3/MAP2K1
Cellular Processes	Cellular community - eukaryotes	hsa04530	Tight junction	170/9434	0.0176471	5.54941	3.38072	0.0163369	0.0197328	0.00216119	3	SRC/RAC1/CCND1
Environmental Information Processing	Signal transduction	hsa04330	Notch signaling pathway	62/9434	0.0322581	10.1441	4.0799	0.016425	0.0197328	0.00216119	2	EP300/CREBBP
Genetic Information Processing	Information processing in viruses	hsa03250	Viral life cycle - HIV-1	64/9434	0.03125	9.82708	4.0019	0.0174422	0.0208104	0.0022792	2	EP300/CREBBP
Human Diseases	Immune disease	hsa05321	Inflammatory bowel disease	66/9434	0.030303	9.52929	3.92727	0.0184857	0.0219043	0.00239902	2	SMAD3/STAT3
Human Diseases	Cardiovascular disease	hsa05416	Viral myocarditis	70/9434	0.0285714	8.98476	3.78712	0.0206502	0.0243026	0.00266168	2	RAC1/CCND1
Metabolism	Carbohydrate metabolism	hsa00562	Inositol phosphate metabolism	73/9434	0.0273973	8.61553	3.68918	0.02234	0.0261136	0.00286003	2	PIK3CB/PLCG1
Cellular Processes	Cell growth and death	hsa04115	p53 signaling pathway	75/9434	0.0266667	8.38578	3.62695	0.0234975	0.0272823	0.00298802	2	CCND1/CDKN1A
Human Diseases	Infectious disease: bacterial	hsa05133	Pertussis	78/9434	0.025641	8.06325	3.53782	0.0252794	0.0291555	0.00319318	2	MAPK1/MAPK3
Genetic Information Processing	Chromosome	hsa03083	Polycomb repressive complex	83/9434	0.0240964	7.57751	3.39939	0.0283681	0.0325012	0.00355961	2	EP300/CREBBP
Human Diseases	Cardiovascular disease	hsa05412	Arrhythmogenic right ventricular cardiomyopathy	86/9434	0.0232558	7.31318	3.32175	0.0302909	0.0344758	0.00377587	2	TCF7L2/LEF1
Organismal Systems	Immune system	hsa04657	IL-17 signaling pathway	95/9434	0.0210526	6.62035	3.1096	0.0363599	0.0411128	0.00450277	2	MAPK1/MAPK3
Organismal Systems	Environmental adaptation	hsa04713	Circadian entrainment	97/9434	0.0206186	6.48385	3.06617	0.0377678	0.0424275	0.00464676	2	MAPK1/MAPK3
Human Diseases	Infectious disease: parasitic	hsa05146	Amoebiasis	103/9434	0.0194175	6.10615	2.94291	0.0421156	0.0470065	0.00514826	2	PIK3CB/PIK3R2

## Sheet: S9
Table S9: Significantly enriched Hallmark gene sets associated with newly predicted genes across cancer types, reported using the same statistical criteria as in Table S8.
BRCA
ID	Description	BgRatio	RichFactor	FoldEnrichment	zScore	pvalue	p.adjust	qvalue	Count	Gene_symbol
HALLMARK_PI3K_AKT_MTOR_SIGNALING	Genes up-regulated by activation of the PI3K/AKT/mTOR pathway.	105/4384	0.0761905	13.3608	9.70803	6.39511e-08	1.91853e-06	1.48097e-06	8	GRB2/MAPK1/RAF1/MAPK8/PLCG1/PTPN11/RAC1/PIK3R3
HALLMARK_IL6_JAK_STAT3_SIGNALING	Genes up-regulated by IL6 [GeneID=3569] via STAT3 [GeneID=6774], e.g., during acute phase response.	87/4384	0.0689655	12.0938	7.91442	6.71978e-06	0.000100797	7.7808e-05	6	GRB2/JUN/PTPN11/STAT3/STAT1/CBL
HALLMARK_UV_RESPONSE_DN	Genes down-regulated in response to ultraviolet (UV) radiation.	144/4384	0.0416667	7.30667	5.82721	0.000119576	0.00119576	0.000923044	6	PIK3CD/MYC/PIK3R3/NFKB1/AKT3/FYN
HALLMARK_APICAL_JUNCTION	Genes encoding components of apical junction complex.	200/4384	0.03	5.2608	4.6706	0.000714845	0.00536134	0.00413858	6	SHC1/PIK3CB/SRC/PLCG1/PIK3R3/AKT3
HALLMARK_COMPLEMENT	Genes encoding components of the complement system, which is part of the innate immune system.	200/4384	0.025	4.384	3.70947	0.00473	0.02838	0.0219074	5	GRB2/SRC/RAF1/PIK3CG/FYN
HNSC
ID	Description	BgRatio	RichFactor	FoldEnrichment	zScore	pvalue	p.adjust	qvalue	Count	Gene_symbol
HALLMARK_PI3K_AKT_MTOR_SIGNALING	Genes up-regulated by activation of the PI3K/AKT/mTOR pathway.	105/4384	0.0857143	14.4527	10.7761	4.09141e-09	1.35016e-07	1.07669e-07	9	AKT1/EGFR/RAF1/GRB2/PTPN11/CDKN1A/PIK3R3/SMAD2/CDKN1B
HALLMARK_UV_RESPONSE_DN	Genes down-regulated in response to ultraviolet (UV) radiation.	144/4384	0.0486111	8.19658	6.78193	1.38902e-05	0.000229189	0.000182766	7	PIK3CD/NFKB1/PIK3R3/AKT3/FYN/PRKCA/CDKN1B
HALLMARK_APICAL_JUNCTION	Genes encoding components of apical junction complex.	200/4384	0.03	5.05846	4.53742	0.000894464	0.00737932	0.00588463	6	EGFR/SHC1/SRC/PIK3CB/PIK3R3/AKT3
HALLMARK_HYPOXIA	Genes up-regulated in response to low oxygen levels (hypoxia).	200/4384	0.03	5.05846	4.53742	0.000894464	0.00737932	0.00588463	6	EGFR/JUN/MAP3K1/CDKN1A/PRKCA/CDKN1B
HALLMARK_IL6_JAK_STAT3_SIGNALING	Genes up-regulated by IL6 [GeneID=3569] via STAT3 [GeneID=6774], e.g., during acute phase response.	87/4384	0.045977	7.75243	4.91322	0.00154968	0.0102279	0.0081562	4	JUN/STAT3/GRB2/PTPN11
HALLMARK_COMPLEMENT	Genes encoding components of the complement system, which is part of the innate immune system.	200/4384	0.025	4.21538	3.59485	0.00564322	0.0310377	0.024751	5	RAF1/JAK2/SRC/GRB2/FYN
STAD
ID	Description	BgRatio	RichFactor	FoldEnrichment	zScore	pvalue	p.adjust	qvalue	Count	Gene_symbol
HALLMARK_PI3K_AKT_MTOR_SIGNALING	Genes up-regulated by activation of the PI3K/AKT/mTOR pathway.	105/4384	0.0952381	16.701	12.3314	9.77409e-11	3.22545e-09	2.46924e-09	10	AKT1/HRAS/EGFR/MAPK1/RAC1/PLCG1/RAF1/PTPN11/CDKN1A/GRB2
HALLMARK_APICAL_JUNCTION	Genes encoding components of apical junction complex.	200/4384	0.035	6.1376	5.63173	8.82306e-05	0.0014558	0.00111449	7	HRAS/EGFR/SRC/PIK3CB/PLCG1/SHC1/AKT3
HALLMARK_WNT_BETA_CATENIN_SIGNALING	Genes up-regulated by activation of WNT signaling through accumulation of beta catenin CTNNB1 [GeneID=1499].	42/4384	0.0714286	12.5257	5.68342	0.00162437	0.0178681	0.0136789	3	MYC/AXIN1/LEF1

## Sheet: S10
Table S10: Overlap among the 100 newly predicted genes in different types of cancer. For each type of cancer, we evaluate how its predicted genes intersect with those of other cancers. As shown, some cancer types, such as BRCA, exhibit high levels of overlap with many others, suggesting shared molecular characteristics. In contrast, cancers such as ESCA show minimal overlap with most other types,…
Cancer Type	BRCA	BLCA	LUAD	STAD	THCA	LUSC	LIHC	HNSC	CESC	PRAD	ESCA
BRCA	100	53	58	52	44	58	51	54	65	63	37
BLCA	53	100	60	55	45	62	60	57	56	56	46
LUAD	58	60	100	60	53	63	59	57	65	54	48
STAD	52	55	60	100	45	57	51	56	59	57	48
THCA	44	45	53	45	100	49	42	52	52	52	33
LUSC	58	62	63	57	49	100	57	61	71	57	47
LIHC	51	60	59	51	42	57	100	50	57	49	43
HNSC	54	57	57	56	52	61	50	100	61	63	43
CESC	65	56	65	59	52	71	57	61	100	61	49
PRAD	63	56	54	57	52	57	49	63	61	100	36
ESCA	37	46	48	48	33	47	43	43	49	36	100

[truncated: 4 more sheets: S11, S12, S13, S14]
